# Supplementary material for: Synthesis, characterization, and α-glucosidase inhibitory activity of methyl proline derivatives of phenylpropanoid
Source: Royal Society of Chemistry journal article supplement (doi:10.1039/d6ra02514e), 2026-05-05
Supplement: d6ra02514e1.pdf [file d6ra02514e1.pdf]

## *Supporting Information*

### **Synthesis, characterization, and $\alpha$ -glucosidase inhibitory activity of methyl proline derivatives of phenylpropanoid**

Weiwei Zhang,<sup>\*,#[a]</sup> Huiwen Yang,<sup>#[a]</sup> Xiangdi Yao,<sup>[a]</sup> Ruipeng Li,<sup>[a]</sup> Yao Yao,<sup>[a]</sup> Wei Ma,<sup>[a]</sup>

Kailiang Ma,<sup>[a]</sup> Lufei Shao<sup>[b]</sup> and Pengjuan Zhou<sup>[c]</sup>

<sup>a</sup> Address here. School of Basic Medical Sciences, Ningxia Medical University, Yinchuan 750004, PR China,

E-mail: [20190033@nxmu.edu.cn](mailto:20190033@nxmu.edu.cn).

<sup>b</sup> The Neurology department, General Hospital of Ningxia Medical University, Yinchuan 750004, PR China

<sup>c</sup> Institute of Agricultural Resources and Environment, Ningxia Academy of Agriculture and Forestry Science

Yinchuan 750004, PR China

<sup>#</sup> W. Zhang and H. Yang contributed equally to this work.

## Content

|                                                                           |           |
|---------------------------------------------------------------------------|-----------|
| <b>1. General Information.....</b>                                        | <b>2</b>  |
| <b>2. Synthetic Procedure and Characterization Data of Products .....</b> | <b>3</b>  |
| <b>3. Spectra .....</b>                                                   | <b>20</b> |
| <b>4. Antimicrobial Susceptibility Testing.....</b>                       | <b>74</b> |

## 1. General Information

All oxygen and/or moisture-sensitive reactions were carried out under Ar atmosphere. Unless otherwise stated, the materials were obtained from commercial suppliers and used without further purification. During the experiment, reagents such as THF, dichloromethane (DCM), triethyl amine (Et<sub>3</sub>N) and *N, N*-Dimethylformamide (DMF) are all purchased highly pure and extra dry reagents, which can be used immediately without further processing. Reactions were monitored using thin-layer chromatography (TLC) carried out on 0.25 mm silica gel plates with UV light, and phosphomolybdic acid/heat as developing agents. Silica gel 200-300 mesh was used for column chromatography. NMR spectra were recorded on Bruker 400 MHz spectrometers at 25 °C in suitable deuterated solvents. Chemical shifts are shown in  $\delta$  <sup>13</sup>C NMR spectra were recorded with a complete proton decoupling environment. The chemical shift values are listed as  $\delta_{\text{H}}$  and  $\delta_{\text{C}}$  for <sup>1</sup>H and <sup>13</sup>C, respectively. Coupling constants (*J*) are reported in hertz (Hz) and the resonance multiplicity abbreviations used are s, singlet; d, doublet; dd, doublet of doublets; t, triplet; q, quartet; m, multiplet; and comp, overlapping multiplets of magnetically non-equivalent protons. Mass spectrometric analysis was performed on an Agilent mass spectrometer (TOF analyzer).

## 2. Synthetic Procedure and Characterization Data of Products

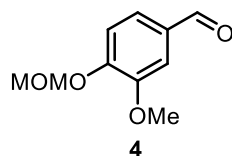

### 3-methoxy-4-(methoxymethoxy)benzaldehyde (**4**)

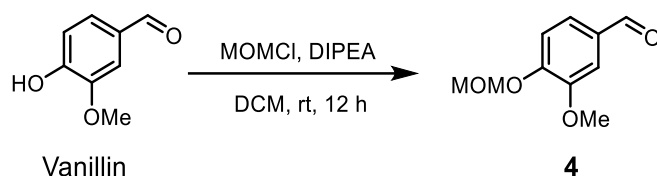

A mixture of vanillin (1.60 g, 39.43 mmol), DIPEA (10.3 mL, 59.15 mmol), and MOMCl (3.0 mL, 39.82 mmol) in CH<sub>2</sub>Cl<sub>2</sub> (100 mL) was stirred at 0 °C under Ar. After the mixture was stirred at room temperature for 12 h. The reaction mixture was poured into water and extracted with CH<sub>2</sub>Cl<sub>2</sub>. The combined organic phases were washed with saturated aqueous NaCl. The organic phase was dried with anhydrous Na<sub>2</sub>SO<sub>4</sub>, filtered and concentrated under vacuum. The residue was purified by chromatography on silica gel (gradient eluent of EtOAc/petroleum ether, 1:10) to give compound **4** as a pale yellow oil (7.50 g, 97% yield)

<sup>1</sup>H NMR (400 MHz, CDCl<sub>3</sub>) δ 9.87 (s, 1H), 7.46 – 7.40 (m, 2H), 7.27 (d, *J* = 9.3 Hz, 1H), 5.33 (s, 2H), 3.95 (s, 3H), 3.52 (s, 3H).

HRMS (ESI): calcd for C<sub>10</sub>H<sub>13</sub>O<sub>4</sub> [M+H]<sup>+</sup> 197.0814, found 197.0818.

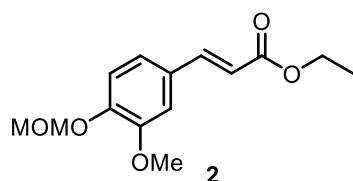

### ethyl (*E*)-3-(3-methoxy-4-(methoxymethoxy)phenyl)acrylate (**2**)

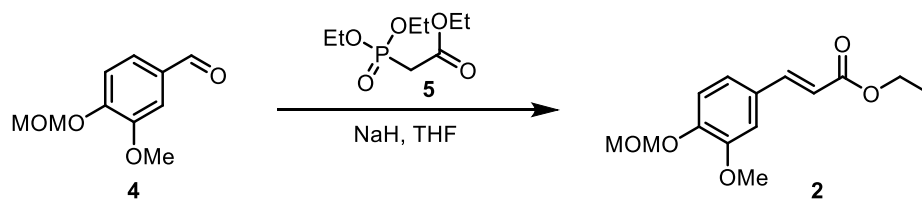

To a stirred suspension of triethyl phosphonoacetate **5** (7.96 mL, 40.14 mmol) in dry THF (100 mL), NaH (2.29 g, 57.35 mmol, 60% in the oil) was added at 0 °C. After the

suspension was stirred for 30 min. A solution of compound **4** (7.50 g, 38.23 mmol) in dry THF (100 mL) was added dropwise at r.t. Then the reaction mixture was stirred for 3-5 h. After reaction was completed (detected by TLC), saturated aqueous NH<sub>4</sub>Cl was added to quench the reaction. The mixture was extracted with EtOAc (50 mL × 3). The organic phase was combined and washed with brine, dried over Na<sub>2</sub>SO<sub>4</sub>, evaporated under vacuum. The residue was purified by chromatography on silica gel (gradient eluent of EtOAc/petroleum ether, 1:10 to 1:3) to give compound **2** (8.65 g, 85% yield) as a pale yellow solid. mp 55.9-57.3 °C

<sup>1</sup>H NMR (400 MHz, CDCl<sub>3</sub>) δ 7.63 (d, *J* = 15.8 Hz, 1H), 7.15 (d, *J* = 8.2 Hz, 1H), 7.11 – 7.04 (m, 2H), 6.33 (d, *J* = 15.9 Hz, 1H), 5.26 (s, 2H), 4.26 (q, *J* = 7.1 Hz, 2H), 3.91 (s, 3H), 3.51 (s, 3H), 1.34 (t, *J* = 7.2 Hz, 3H).

<sup>13</sup>C NMR (101 MHz, CDCl<sub>3</sub>) δ 167.3, 149.9, 148.6, 144.5, 129.0, 122.3, 116.7, 116.0, 110.5, 95.3, 60.5, 56.4, 56.0, 14.5.

HRMS (ESI): calcd for C<sub>14</sub>H<sub>18</sub>O<sub>5</sub>Na [M+Na]<sup>+</sup> 289.1052, found 289.1057.

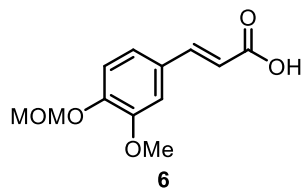

**(E)-3-(3-methoxy-4-(methoxymethoxy)phenyl)acrylic acid (**6**)**

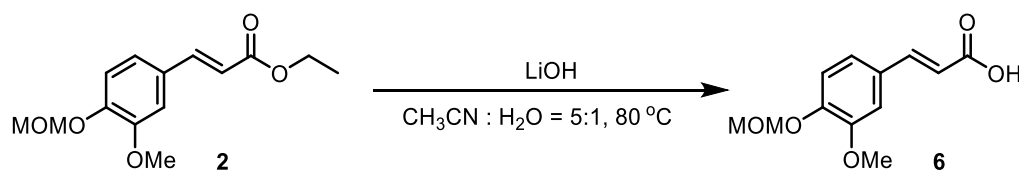

The compound **2** (300.0 mg, 0.54 mmol) was dissolved in 6.0 mL acetonitrile and water mixed solvents and stirred. LiOH (4.34 g, 17.27 mmol) was slowly added to the reaction at 80 °C for 3 h. After the mixture was cooled to room temperature, solvent was removed by evaporation under reduced pressure. The combined organic phases were washed with saturated aqueous NaCl. The mixture was extracted with CH<sub>2</sub>Cl<sub>2</sub> (50 mL × 3). The organic phase was combined and washed with brine, dried over Na<sub>2</sub>SO<sub>4</sub>, evaporated under vacuum. The residue was purified by chromatography on silica gel (gradient eluent of EtOAc/petroleum ether, 1:10 to 1:3) to give compound **6** (96 mg,

75% yield) as a white powder.

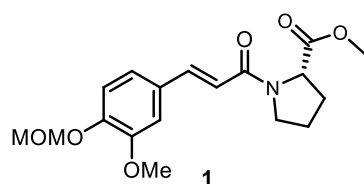

### ethyl (*E*)-3-(3-methoxy-4-(methoxymethoxy)phenyl)acryloyl)-*L*-prolinate (**1**)

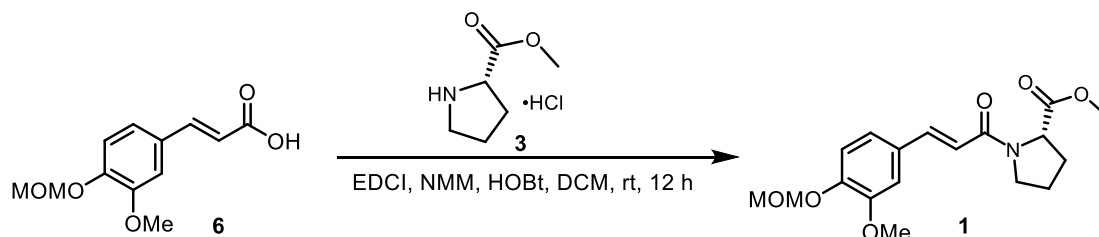

The crude product **6** (0.65 mmol) and **3** (128 mg, 0.72 mmol) was dissolved in CH<sub>2</sub>Cl<sub>2</sub> (15 ml), HOBT (44mg, 0.33mmol), EDCI(187mg, 0.98 mmol), and NMM(0.145 mL, 1.3 mmol) was added. Then the reaction mixture was stirred at r.t. for 12 h. After reaction was completed (detected by TLC), 10 ml water was added to quench the reaction, the aqueous and organic layers were separated; the aqueous layer was extracted with CH<sub>2</sub>Cl<sub>2</sub> (10 mL × 3), dried over Na<sub>2</sub>SO<sub>4</sub>, evaporated under vacuum. The residue was purified by chromatography on silica gel (gradient eluent of EtOAc/petroleum ether, 1:5 to 2:1) to give compound **1** (183 mg, 77%) as a colorless oil

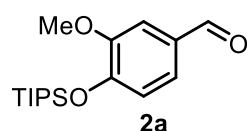

### 3-methoxy-4-((triisopropylsilyl)oxy)benzaldehyde (**2a**)

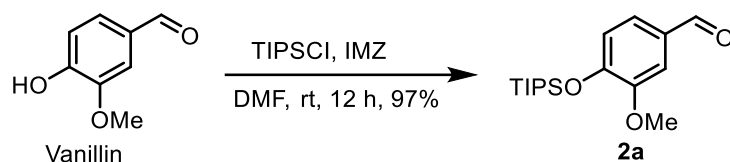

Under N<sub>2</sub> atmosphere, a mixture of vanillin (6.0 g, 39.43 mmol), imidazole (5.37 g, 78.87 mmol) and 100 ml dry DMF was stirred for 5 min. To this mixture was added TIPSCl (16.88 mL, 78.87 mmol), and the solution was then stirred for 7 h. After reaction was completed (detected by TLC), the reaction was quenched with H<sub>2</sub>O and extracted with EtOAc. The combined organic phase was washed with brine, dried over

Na<sub>2</sub>SO<sub>4</sub>, and evaporated under vacuum. The resulting residue was purified by column chromatography over silica gel (gradient eluent of EtOAc/petroleum ether, 1:20 to 1:5) to afford **2a** (11.92 g, 98%) as a colourless oil.

<sup>1</sup>H NMR (400 MHz, CDCl<sub>3</sub>) δ 9.84 (s, 1H), 7.40 (s, 1H), 7.36 (d, *J* = 8.1 Hz, 1H), 6.98 (d, *J* = 8.0 Hz, 1H), 3.87 (s, 3H), 1.33 – 1.23 (m, 3H), 1.12 – 1.07 (m, 18H).

<sup>13</sup>C NMR (101 MHz, CDCl<sub>3</sub>) δ 191.2, 152.0, 151.7, 130.7, 126.4, 120.3, 110.1, 55.6, 17.9, 13.0.

HRMS (ESI): calcd for C<sub>17</sub>H<sub>29</sub>O<sub>3</sub>Si [M+H]<sup>+</sup> 309.1886, found 309.1890.

#### 4-methoxy-3-((triisopropylsilyl)oxy)benzaldehyde (**3a**)

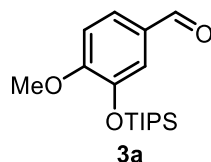

Under the same reaction conditions, compound **3a** (5.77 g, 95%) was obtained as a colorless oil from isovanillin.

<sup>1</sup>H NMR (400 MHz, CDCl<sub>3</sub>) δ 9.82 (s, 1H), 7.46 (dd, *J* = 8.3, 1.9 Hz, 1H), 7.39 (s, 1H), 6.95 (d, *J* = 8.2 Hz, 1H), 3.90 (s, 3H), 1.32 – 1.23 (m, 3H), 1.13 – 1.07 (m, 18H).

<sup>13</sup>C NMR (101 MHz, CDCl<sub>3</sub>) δ 191.1, 156.7, 146.2, 130.2, 126.3, 119.4, 111.2, 55.7, 18.0, 12.9.

HRMS (ESI): calcd for C<sub>17</sub>H<sub>29</sub>O<sub>3</sub>Si [M+H]<sup>+</sup> 309.1886, found 309.1890.

#### 2-methoxy-3-((triisopropylsilyl)oxy)benzaldehyde (**4a**)

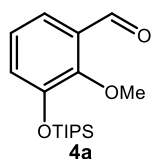

Under the same reaction conditions, compound **4a** (812 mg, 80%) was obtained as a colorless oil from 2-methoxy-3-hydroxybenzaldehyde.

<sup>1</sup>H NMR (400 MHz, CDCl<sub>3</sub>) δ 10.41 (s, 1H), 7.42 (t, *J* = 5.0 Hz, 1H), 7.13 (t, *J* = 5.0 Hz, 1H), 7.05 (td, *J* = 8.0, 2.6 Hz, 1H), 3.97 (s, 3H), 1.36 – 1.24 (m, 3H), 1.15 – 1.10 (m, 18H).

<sup>13</sup>C NMR (101 MHz, CDCl<sub>3</sub>) δ 190.6, 154.5, 149.9, 130.5, 126.6, 124.3, 120.2, 62.4, 18.0, 12.9.

HRMS (ESI): calcd for C<sub>17</sub>H<sub>29</sub>O<sub>3</sub>Si [M+H]<sup>+</sup> 309.1886, found 309.1888.

### 3-methoxy-2-((triisopropylsilyl)oxy)benzaldehyde (5a)

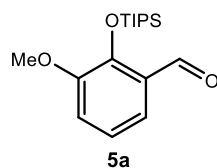

Under the same reaction conditions, compound **5a** (2.49 g, 82%) was obtained as a colorless oil from o-vanillin.

<sup>1</sup>H NMR (400 MHz, CDCl<sub>3</sub>) δ 10.56 (s, 1H), 7.38 (dd, *J* = 7.9, 1.7 Hz, 1H), 7.04 (dd, *J* = 8.0, 1.6 Hz, 1H), 6.94 (td, *J* = 7.9, 0.9 Hz, 1H), 3.83 (s, 3H), 1.35 – 1.24 (m, 3H), 1.11 – 1.07 (m, 18H).

<sup>13</sup>C NMR (101 MHz, CDCl<sub>3</sub>) δ 190.7, 150.6, 150.1, 127.5, 120.8, 119.2, 116.6, 55.2, 18.1, 14.1.

HRMS (ESI): calcd for C<sub>17</sub>H<sub>29</sub>O<sub>3</sub>Si [M+H]<sup>+</sup> 309.1886, found 309.1887.

### 2-methoxy-4-((triisopropylsilyl)oxy)benzaldehyde (6a)

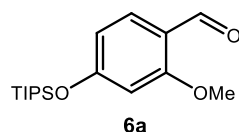

Under the same reaction conditions, compound **6a** (1.3 g, 43%) was obtained as a colorless oil from 4-hydroxy-2-methoxybenzaldehyde.

<sup>1</sup>H NMR (400 MHz, CDCl<sub>3</sub>) δ 10.28 (s, 1H), 7.74 (d, *J* = 8.4 Hz, 1H), 6.50 (d, *J* = 8.5 Hz, 1H), 6.44 (s, 1H), 3.88 (s, 3H), 1.36 – 1.22 (m, 3H), 1.15 – 0.98 (m, 18H).

<sup>13</sup>C NMR (101 MHz, CDCl<sub>3</sub>) δ 188.6, 163.8, 163.6, 130.6, 119.2, 112.6, 103.2, 55.7, 18.0, 12.8.

HRMS (ESI): calcd for C<sub>17</sub>H<sub>29</sub>O<sub>3</sub>Si [M+H]<sup>+</sup> 309.1886, found 309.1890.

### 4-methoxy-2-((triisopropylsilyl)oxy)benzaldehyde (7a)

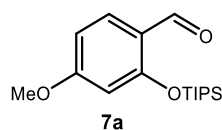

Under the same reaction conditions, compound **7a** (1.89 g, 62%) was obtained as a colorless oil from 2-hydroxy-4-methoxybenzaldehyde.

$^1\text{H}$  NMR (400 MHz,  $\text{CDCl}_3$ )  $\delta$  10.38 (s, 1H), 7.79 (dd,  $J = 8.7, 1.9$  Hz, 1H), 6.57 (d,  $J = 8.7$  Hz, 1H), 6.37 (s, 1H), 3.83 (s, 3H), 1.41 – 1.29 (m,  $J = 6.7, 5.8$  Hz, 3H), 1.19 – 1.10 (m, 18H).

$^{13}\text{C}$  NMR (101 MHz,  $\text{CDCl}_3$ )  $\delta$  189.0, 165.9, 161.3, 130.1, 121.1, 107.5, 104.8, 55.7, 18.1, 13.1.

HRMS (ESI): calcd for  $\text{C}_{17}\text{H}_{29}\text{O}_3\text{Si}$   $[\text{M}+\text{H}]^+$  309.1886, found 309.1884.

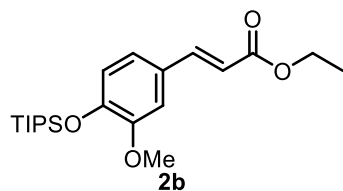

**ethyl (*E*)-3-(3-methoxy-4-((triisopropylsilyloxy)phenyl)acrylate (**2b**)**

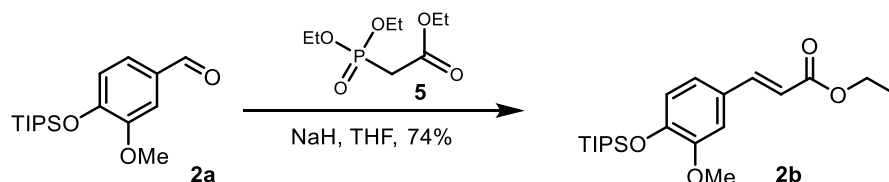

To a stirred suspension of Triethyl phosphonoacetate **5** (4.73 ml, 23.80 mmol) in dry THF (100 ml), NaH (1.36 g, 34.04 mmol) was added at 0 °C. After the suspension was stirred for 30 min. A solution of compound **2a** (7.0 g, 22.69 mmol) in dry THF (100 ml) was added dropwise at r.t. Then the reaction mixture was stirred for 3-5 h. After reaction was completed (detected by TLC), 50 ml saturated aqueous  $\text{NH}_4\text{Cl}$  was added to quench the reaction. The mixture was extracted with EtOAc (50 ml  $\times$  3). The organic phase was combined and washed with brine, dried over  $\text{Na}_2\text{SO}_4$ , evaporated under vacuum. The residue was purified by chromatography on silica gel (gradient eluent of EtOAc/petroleum ether, 1:20 to 1:5) to give compound **2b** (6.36 g, 74%) as a colorless oil.

$^1\text{H}$  NMR (400 MHz,  $\text{CDCl}_3$ )  $\delta$  7.61 (d,  $J = 16.0$  Hz, 1H), 7.00 (d,  $J = 7.8$  Hz, 2H), 6.85 (d,  $J = 7.9$  Hz, 1H), 6.29 (d,  $J = 15.9$  Hz, 1H), 4.25 (q,  $J = 7.1$  Hz, 2H), 3.82 (s, 3H), 1.33 (t,  $J = 7.1$  Hz, 3H), 1.29 – 1.22 (m, 3H), 1.13 – 1.06 (m, 18H).

$^{13}\text{C}$  NMR (101 MHz,  $\text{CDCl}_3$ )  $\delta$  167.46, 151.25, 148.15, 144.90, 128.10, 122.32, 120.66, 115.90, 110.94, 60.45, 55.56, 18.00, 14.51, 13.04.

HRMS(ESI) calcd for  $\text{C}_{21}\text{H}_{35}\text{O}_4\text{Si}$   $[\text{M}+\text{H}]^+$  379.2305, found 379.2307.

**ethyl (*E*)-3-(4-methoxy-3-((triisopropylsilyl)oxy)phenyl)acrylate (3b)**

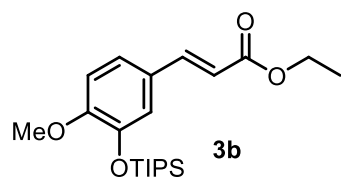

Using the same experimental procedure as described above, compound **3b** (1.2 g, 83%) was obtained as a pale yellow oil.

$^1\text{H}$  NMR (400 MHz,  $\text{CDCl}_3$ )  $\delta$  7.58 (d,  $J = 15.9$  Hz, 1H), 7.12 – 7.05 (m, 2H), 6.83 (d,  $J = 8.0$  Hz, 1H), 6.24 (d,  $J = 15.9$  Hz, 1H), 4.26 (q,  $J = 7.1$  Hz, 2H), 3.84 (s, 3H), 1.34 (t,  $J = 7.1$  Hz, 3H), 1.30 – 1.21 (m, 3H), 1.12 – 1.07 (m, 18H).

$^{13}\text{C}$  NMR (101 MHz,  $\text{CDCl}_3$ )  $\delta$  167.5, 153.2, 145.7, 144.8, 127.4, 123.0, 119.3, 115.6, 111.7, 60.5, 55.5, 18.0, 14.5, 13.0.

HRMS (ESI): calcd for  $\text{C}_{21}\text{H}_{35}\text{O}_4\text{Si}$   $[\text{M}+\text{H}]^+$  379.2305, found 379.2308.

**ethyl (*E*)-3-(2-methoxy-3-((triisopropylsilyl)oxy)phenyl)acrylate (4b)**

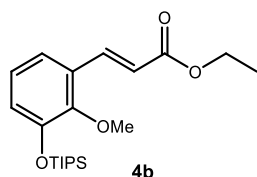

Compound **4b** (850 mg, 58%) was obtained as a pale yellow oil.

$^1\text{H}$  NMR (400 MHz,  $\text{CDCl}_3$ )  $\delta$  7.99 (d,  $J = 16.2$  Hz, 1H), 7.15 (dd,  $J = 7.7, 1.8$  Hz, 1H), 6.96 (t,  $J = 7.8$  Hz, 1H), 6.91 (dd,  $J = 8.0, 1.7$  Hz, 1H), 6.48 (d,  $J = 16.2$  Hz, 1H), 4.26 (q,  $J = 7.1$  Hz, 2H), 3.84 (s, 3H), 1.34 (t,  $J = 7.2$  Hz, 3H), 1.31 – 1.25 (m, 3H), 1.13 – 1.09 (m, 18H).

$^{13}\text{C}$  NMR (101 MHz,  $\text{CDCl}_3$ )  $\delta$  167.4, 150.4, 149.9, 139.8, 129.3, 124.2, 122.3, 120.0, 119.4, 61.3, 60.6, 18.0, 14.5, 12.9.

HRMS (ESI): calcd for  $\text{C}_{21}\text{H}_{35}\text{O}_4\text{Si}$   $[\text{M}+\text{H}]^+$  379.2305, found 379.2308.

**ethyl (*E*)-3-(3-methoxy-2-((triisopropylsilyl)oxy)phenyl)acrylate (5b)**

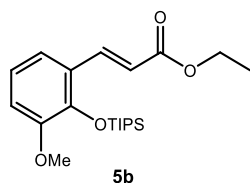

Compound **5b** (1.13 g, 77%) was obtained as a pale yellow oil.

$^1\text{H}$  NMR (400 MHz,  $\text{CDCl}_3$ )  $\delta$  8.22 (d,  $J = 16.2$  Hz, 1H), 7.14 (dd,  $J = 7.5, 1.8$  Hz, 1H), 6.92 – 6.80 (m, 2H), 6.34 (d,  $J = 16.2$  Hz, 1H), 4.25 (q,  $J = 7.1$  Hz, 2H), 3.80 (s, 3H), 1.34 (t,  $J = 7.1$  Hz, 3H), 1.31 – 1.24 (m, 3H), 1.11 – 1.07 (m, 18H).

$^{13}\text{C}$  NMR (101 MHz,  $\text{CDCl}_3$ )  $\delta$  167.3, 150.5, 145.2, 140.1, 126.1, 120.8, 118.3, 117.9, 112.6, 60.4, 55.0, 18.2, 18.2, 14.5, 14.0.

HRMS (ESI): calcd for  $\text{C}_{21}\text{H}_{35}\text{O}_4\text{Si}$   $[\text{M}+\text{H}]^+$  379.2305, found 379.2306.

**ethyl (*E*)-3-(2-methoxy-4-((triisopropylsilyl)oxy)phenyl)acrylate (6b)**

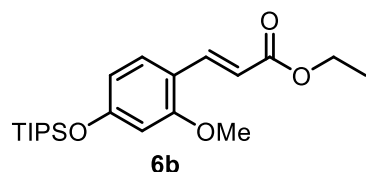

Compound **6b** (960 mg, 60%) was obtained as a colorless oil.

$^1\text{H}$  NMR (400 MHz,  $\text{CDCl}_3$ )  $\delta$  7.90 (d,  $J = 16.1$  Hz, 1H), 7.36 (d,  $J = 8.4$  Hz, 1H), 6.47 (dd,  $J = 8.4, 2.2$  Hz, 1H), 6.45 – 6.39 (m, 2H), 4.25 (q,  $J = 7.1$  Hz, 2H), 3.84 (s, 3H), 1.33 (t,  $J = 7.1$  Hz, 3H), 1.30 – 1.23 (m, 3H), 1.14 – 1.08 (m, 18H).

$^{13}\text{C}$  NMR (101 MHz,  $\text{CDCl}_3$ )  $\delta$  168.1, 159.9, 159.6, 140.1, 130.3, 116.8, 116.2, 112.2, 103.5, 60.3, 55.5, 18.0, 14.6, 12.8.

HRMS (ESI): calcd for  $\text{C}_{21}\text{H}_{35}\text{O}_4\text{Si}$   $[\text{M}+\text{H}]^+$  379.2305, found 379.2307.

**ethyl (*E*)-3-(4-methoxy-2-((triisopropylsilyl)oxy)phenyl)acrylate (7b)**

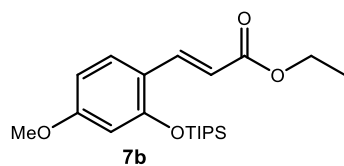

Compound **7b** (1.5 g, 65%) was obtained as a colorless oil.

$^1\text{H}$  NMR (400 MHz,  $\text{CDCl}_3$ )  $\delta$  8.11 (d,  $J = 16.2$  Hz, 1H), 7.49 (d,  $J = 8.7$  Hz, 1H), 6.52 (dd,  $J = 8.7, 2.5$  Hz, 1H), 6.39 (d,  $J = 2.5$  Hz, 1H), 6.28 (d,  $J = 16.2$  Hz, 1H), 4.23 (q,  $J = 7.1$  Hz, 2H), 3.79 (s, 3H), 1.37 – 1.28 (m, 6H), 1.16 – 1.12 (m, 18H).

$^{13}\text{C}$  NMR (101 MHz,  $\text{CDCl}_3$ )  $\delta$  167.8, 167.7, 162.4, 162.4, 156.5, 139.8, 128.4, 118.8, 118.7, 115.2, 115.1, 107.2, 107.2, 105.3, 105.2, 60.2, 60.2, 55.5, 55.4, 18.1, 18.1, 14.5, 13.0, 13.0.

HRMS (ESI): calcd for  $\text{C}_{21}\text{H}_{35}\text{O}_4\text{Si}$   $[\text{M}+\text{H}]^+$  379.2305, found 379.2309.

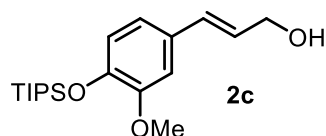

**(E)-3-(3-methoxy-4-((triisopropylsilyl)oxy)phenyl)prop-2-en-1-ol (2c)**

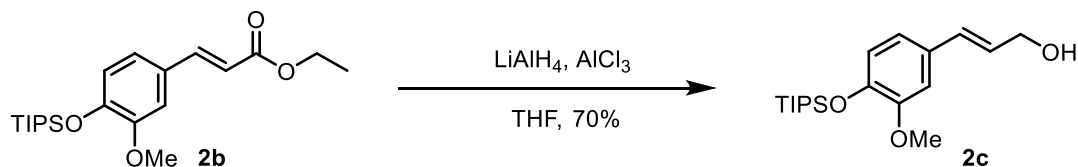

A mixture of compound **2b** (400 mg, 1.056 mmol), LiAlH<sub>4</sub> (120.3 mg, 3.17 mmol) and AlCl<sub>3</sub> (141 mg, 1.056 mmol) in dry THF (100 ml) was stirred at 0 °C for 30 min. After reaction was completed (detected by TLC), add 0.12 ml of water, 0.24 ml of 10% sodium hydroxide solution, and 0.36 ml of water slowly in sequence, and quench the reaction in three steps. Filter out the solid impurities through diatomaceous earth to obtain the filtrate, evaporated under vacuum. The residue was purified by chromatography on silica gel (gradient eluent of EtOAc/petroleum ether, 1:10 to 1:2) to give compound **2c** (248.78 mg, 70%) as a pale yellow oil:

<sup>1</sup>H NMR (400 MHz, CDCl<sub>3</sub>) δ 6.90 (s, 1H), 6.82 (d, *J* = 2.4 Hz, 2H), 6.57 – 6.47 (m, 1H), 6.22 (dt, *J* = 15.8, 6.0 Hz, 1H), 4.29 (dd, *J* = 6.0, 1.4 Hz, 2H), 3.81 (s, 3H), 1.29 – 1.20 (m, 3H), 1.12 – 1.07 (m, 18H).

<sup>13</sup>C NMR (101 MHz, CDCl<sub>3</sub>) δ 151.07, 145.73, 131.62, 130.33, 126.41, 120.53, 119.70, 110.02, 64.02, 55.57, 18.02, 13.01.

HRMS(ESI) calcd for C<sub>19</sub>H<sub>33</sub>O<sub>3</sub>Si [M+H]<sup>+</sup> 337.2199, found 337.2194.

**(E)-3-(4-methoxy-3-((triisopropylsilyl)oxy)phenyl)prop-2-en-1-ol (3c)**

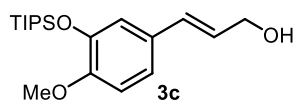

Compound **3c** (673.1 mg, 88%) was obtained as a pale yellow oil.

<sup>1</sup>H NMR (400 MHz, CDCl<sub>3</sub>) δ 6.95 (s, 1H), 6.91 (d, *J* = 8.3 Hz, 1H), 6.78 (d, *J* = 8.3 Hz, 1H), 6.49 (d, *J* = 15.8 Hz, 1H), 6.23 – 6.13 (m, 1H), 4.29 (d, *J* = 5.2 Hz, 2H), 3.80 (s, 3H), 1.29 – 1.20 (m, 3H), 1.12 – 1.06 (m, 18H).

<sup>13</sup>C NMR (101 MHz, CDCl<sub>3</sub>) δ 151.0, 145.6, 131.4, 129.7, 126.1, 120.3, 118.2, 111.9, 64.1, 55.6, 18.0, 13.0.

HRMS (ESI): calcd for C<sub>19</sub>H<sub>33</sub>O<sub>3</sub>Si [M+H]<sup>+</sup> 337.2199, found 337.2194.

**(E)-3-(2-methoxy-3-((triisopropylsilyl)oxy)phenyl)prop-2-en-1-ol (4c)**

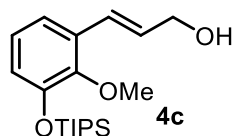

Compound **4c** (370 mg, 49%) was obtained as a colorless oil.

<sup>1</sup>H NMR (400 MHz, CDCl<sub>3</sub>) δ 7.08 (dd, *J* = 7.9, 1.5 Hz, 1H), 6.96 – 6.88 (m, 2H), 6.79 (dd, *J* = 8.1, 1.5 Hz, 1H), 6.38 (dt, *J* = 16.1, 5.9 Hz, 1H), 4.34 (dd, *J* = 5.9, 1.5 Hz, 2H), 3.80 (s, 3H), 1.32 – 1.25 (m, 3H), 1.12 – 1.10 (m, 18H).

<sup>13</sup>C NMR (101 MHz, CDCl<sub>3</sub>) δ 149.6, 148.8, 131.3, 129.7, 126.0, 124.0, 119.9, 118.8, 64.3, 60.9, 18.1, 12.9.

HRMS (ESI): calcd for C<sub>19</sub>H<sub>33</sub>O<sub>3</sub>Si [M+H]<sup>+</sup> 337.2199, found 337.2191.

**(E)-3-(3-methoxy-2-((triisopropylsilyl)oxy)phenyl)prop-2-en-1-ol (5c)**

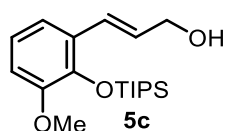

Compound **5c** (606 mg, 60.4%) was obtained as a pale yellow oil.

<sup>1</sup>H NMR (400 MHz, CDCl<sub>3</sub>) δ 7.07 (s, 1H), 7.04 (d, *J* = 7.0 Hz, 1H), 6.84 (t, *J* = 7.9 Hz, 1H), 6.73 (d, *J* = 7.9 Hz, 1H), 6.32 – 6.22 (m, 1H), 4.31 (d, *J* = 4.2 Hz, 2H), 3.77 (s, 3H), 1.30 – 1.22 (m, 3H), 1.10 – 1.06 (m, 18H).

<sup>13</sup>C NMR (101 MHz, CDCl<sub>3</sub>) δ 150.4, 143.3, 128.4, 127.0, 120.7, 118.0, 110.4, 64.5, 54.9, 18.2, 14.0.

HRMS (ESI): calcd for C<sub>19</sub>H<sub>33</sub>O<sub>3</sub>Si [M+H]<sup>+</sup> 337.2199, found 337.2203.

**(E)-3-(2-methoxy-4-((triisopropylsilyl)oxy)phenyl)prop-2-en-1-ol (6c)**

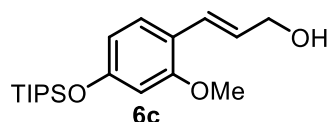

Compound **6c** (715 mg, 84%) was obtained as a pale yellow oil.

<sup>1</sup>H NMR (400 MHz, CDCl<sub>3</sub>) δ 7.27 (dd, *J* = 8.3, 1.7 Hz, 1H), 6.83 (d, *J* = 16.0 Hz, 1H), 6.45 (dd, *J* = 8.3, 2.0 Hz, 1H), 6.42 (d, *J* = 2.0 Hz, 1H), 6.35 – 6.22 (m, 1H), 4.28 (d, *J* = 6.0 Hz, 2H), 3.80 (s, 3H), 1.33 – 1.22 (m, 3H), 1.14 – 1.07 (m, 18H).

$^{13}\text{C}$  NMR (101 MHz,  $\text{CDCl}_3$ )  $\delta$  157.9, 157.2, 127.7, 127.0, 126.5, 118.8, 112.0, 103.5, 64.7, 55.5, 18.1, 12.8.

HRMS (ESI): calcd for  $\text{C}_{19}\text{H}_{32}\text{O}_3\text{NaSi}$   $[\text{M}+\text{Na}]^+$  359.2018, found 359.2014.

**(E)-3-(4-methoxy-2-((triisopropylsilyl)oxy)phenyl)prop-2-en-1-ol (7c)**

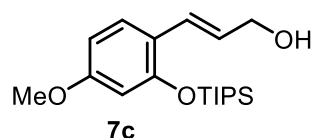

Compound **7c** (1.2 g, 90%) was obtained as a pale yellow oil.

$^1\text{H}$  NMR (400 MHz,  $\text{CDCl}_3$ )  $\delta$  7.39 (d,  $J = 8.6$  Hz, 1H), 6.93 (d,  $J = 16.0$  Hz, 1H), 6.49 (dd,  $J = 8.6, 2.5$  Hz, 1H), 6.38 (d,  $J = 2.5$  Hz, 1H), 6.20 (dt,  $J = 16.0, 6.2$  Hz, 1H), 4.29 (t,  $J = 5.0$  Hz, 2H), 3.77 (s, 3H), 1.34 – 1.29 (m, 3H), 1.13 – 1.11 (m, 18H).

$^{13}\text{C}$  NMR (101 MHz,  $\text{CDCl}_3$ )  $\delta$  160.2, 154.5, 127.1, 126.9, 126.0, 120.7, 106.6, 105.3, 64.7, 55.4, 18.2, 18.2, 13.1.

HRMS (ESI): calcd for  $\text{C}_{19}\text{H}_{33}\text{O}_3\text{Si}$   $[\text{M}+\text{H}]^+$  337.2199, found 337.2194.

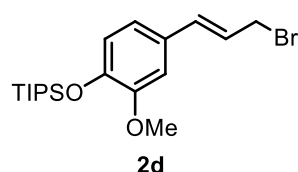

**(E)-4-(3-bromoprop-1-en-1-yl)-2-methoxyphenoxytriisopropylsilane (2d)**

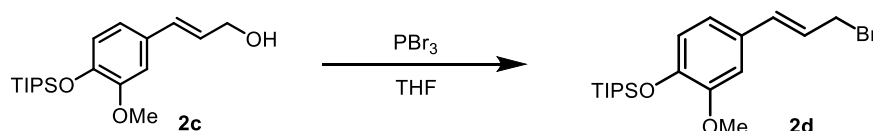

Under  $\text{Ar}_2$  atmosphere, to a mixture of compound **2c** (250 mg, 0.74 mmol) and 10 ml dry THF,  $\text{PBr}_3$  (0.08 ml, 0.85 mmol) was added slowly at 0 °C. Then the reaction mixture was stirred for 30 min. After reaction was completed (detected by TLC), 20 ml ice water was added to quench the reaction. The mixture was extracted with EtOAc (20 ml  $\times$  3). The organic phase was combined and washed with brine, dried over  $\text{Na}_2\text{SO}_4$ , evaporated under vacuum to afford crude product **2d**, which was immediately used without further purification.

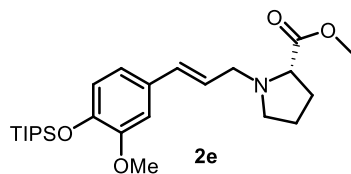

**methyl (*E*)-3-(3-methoxy-4-((triisopropylsilyloxy)phenyl)allyl)-*L*-prolinate (**2e**)**

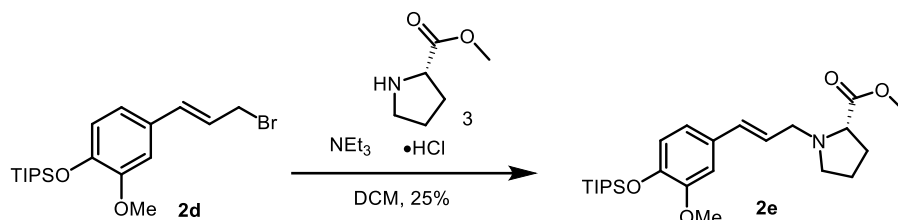

The crude product **2d** (0.74 mmol) was dissolved in CH<sub>2</sub>Cl<sub>2</sub> (100 ml) with triethylamine (0.237 ml, 1.702 mmol) and methyl *L*-prolinate hydrochloride **3** (122.6 mg, 0.74 mmol) was added. Then the reaction mixture was stirred at r.t. for 12 h. After reaction was completed (detected by TLC), 100 ml water was added to quench the reaction, the aqueous and organic layers were separated; the aqueous layer was extracted with CH<sub>2</sub>Cl<sub>2</sub> (100 mL × 3), dried over Na<sub>2</sub>SO<sub>4</sub>, evaporated under vacuum. The residue was purified by chromatography on silica gel (gradient eluent of EtOAc/petroleum ether, 1:10 to 2:1) to give compound **2e** (82.8 mg, 25%) as a colorless oil

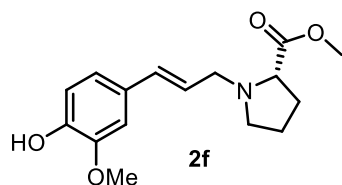

**methyl (*E*)-3-(4-hydroxy-3-methoxyphenyl)allyl)-*L*-prolinate (**2f**)**

**previously reported compound: *N-trans*-ferulic-*L*-proline methyl ester**

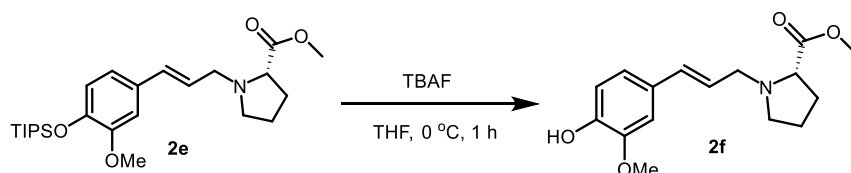

Under Ar<sub>2</sub> atmosphere, to a mixture of **2e** (240 mg, 0.54 mmol) in 10 ml dry THF, tetrabutyl ammonium fluoride solution (1 mol/L in THF) was added slowly at 0 °C. Then the reaction mixture was stirred for 2 h. After reaction was completed (detected by TLC), 10 ml water was added to quench the reaction. The mixture was extracted with EtOAc. The organic phase was combined and washed with brine, dried over

Na<sub>2</sub>SO<sub>4</sub>, evaporated under vacuum. The residue was purified by chromatography on silica gel (gradient eluent of EtOAc/petroleum ether, 1:10 to 4:1) to afford **2f** (34.6 mg, 22%) as a colourless oil

<sup>1</sup>H NMR (400 MHz, DMSO-*d*<sub>6</sub>) δ 8.99 (s, 1H), 6.99 (d, *J* = 1.9 Hz, 1H), 6.78 (dd, *J* = 8.1, 1.9 Hz, 1H), 6.70 (d, *J* = 8.0 Hz, 1H), 6.37 (d, *J* = 15.8 Hz, 1H), 6.09 (dt, *J* = 15.8, 6.7 Hz, 1H), 3.77 (s, 3H), 3.57 (s, 3H), 3.39 – 3.35 (m, 1H), 3.23 – 3.13 (m, 2H), 3.02 – 2.93 (m, 1H), 2.45 – 2.34 (m, 1H), 2.10 – 1.97 (m, 1H), 1.85 – 1.70 (m, 3H).

<sup>13</sup>C NMR (101 MHz, DMSO-*d*<sub>6</sub>) δ 174.0, 147.7, 146.3, 131.6, 128.3, 124.1, 119.5, 115.4, 109.7, 64.2, 55.9, 55.5, 52.7, 51.3, 28.9, 22.9.

HRMS(ESI) calcd for C<sub>16</sub>H<sub>22</sub>NO<sub>4</sub> [M+H]<sup>+</sup> 292.1549, found 292.1553.

**Table S1. Comparison of the  $^1\text{H}$  NMR (DMSO- $d_6$ ) and  $^{13}\text{C}$  NMR (DMSO- $d_6$ ) data of natural and our synthetic *N-trans-ferulic-L-proline* methyl ester.**

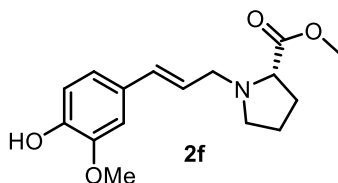

| No.    | $^1\text{H}$ NMR                                         |                                            | $^{13}\text{C}$ NMR              |                                    |
|--------|----------------------------------------------------------|--------------------------------------------|----------------------------------|------------------------------------|
|        | Natural<br>(600 MHz)<br>$\delta$ (J, Hz)                 | Synthetic<br>(400 MHz)<br>$\delta$ (J, Hz) | Natural<br>(150 MHz)<br>$\delta$ | Synthetic<br>(100 MHz)<br>$\delta$ |
| 1      | 3.72 (dd, 12.8, 7.2, H-1a)<br>3.56 (dd, 12.8, 7.2, H-1b) |                                            | 56.0                             | 55.9                               |
| 2      | 6.11 (dt, 16.0, 7.2)                                     | 6.09 (dt, 15.8, 6.7)                       | 118.5                            | 119.5                              |
| 3      | 6.58 (d, 16.0)                                           | 6.37 (d, 15.8)                             | 136.4                            | 131.6                              |
| 4      |                                                          |                                            | 127.4                            | 128.3                              |
| 5      | 7.00 (d, 2.0)                                            | 6.99 (d, 1.9)                              | 109.2                            | 109.7                              |
| 6      |                                                          |                                            | 148.0                            | 147.7                              |
| 7      |                                                          |                                            | 147.4                            | 146.3                              |
| 8      | 6.72 (d, 8.0)                                            | 6.70 (d, 8.0)                              | 115.8                            | 115.4                              |
| 9      | 6.81 (dd, 8.0, 2.0)                                      | 6.78 (dd, 8.1, 1.9)                        | 120.4                            | 124.1                              |
| 1'     | 3.50 (m)                                                 | 3.39-3.35 (m)                              | 65.1                             | 64.2                               |
| 2'     | 2.20 (m, H-2'a); 1.90 (m, H-2'b)                         | 2.10-1.97 (m, 1 H)                         | 30.2                             | 28.9                               |
| 3'     | 1.85 (m, H-3'a); 1.68 (m, H-3'b)                         | 1.85-1.70 (m, 3 H)                         | 23.5                             | 22.9                               |
| 4'     | 3.41 (m, H-4'a); 2.80 (m, H-4'b)                         |                                            | 53.2                             | 52.7                               |
| 5'     | -                                                        |                                            | 169.1                            | 174.0                              |
| 6-OMe  | 3.76 (s)                                                 | 3.77 (s)                                   | 55.9                             | 55.5                               |
| 5'-OMe | 3.66 (s)                                                 | 3.57 (s)                                   | 51.5                             | 51.3                               |

**methyl (*E*)-(3-(3-hydroxy-4-methoxyphenyl)allyl)-*L*-prolinate (3f)**

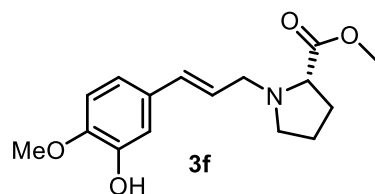

Compound **3f** was obtained as a colorless oil (40 mg, 25% yield)

$^1\text{H NMR}$  (400 MHz,  $\text{DMSO-}d_6$ )  $\delta$  8.95 (s, 1H), 6.88 – 6.81 (m, 2H), 6.76 (dd,  $J = 8.3$ , 2.1 Hz, 1H), 6.35 (d,  $J = 15.8$  Hz, 1H), 6.01 (dt,  $J = 15.6$ , 6.7 Hz, 1H), 3.75 (s, 3H), 3.56 (s, 3H), 3.34 – 3.26 (m, 1H), 3.25 – 3.13 (m, 2H), 3.02 – 2.90 (m, 1H), 2.40 (q,  $J = 7.9$  Hz, 1H), 2.11 – 1.95 (m, 1H), 1.85 – 1.67 (m, 3H).

$^{13}\text{C NMR}$  (101 MHz,  $\text{DMSO-}d_6$ )  $\delta$  174.0, 147.4, 146.5, 131.4, 129.8, 124.7, 117.8, 112.7, 112.1, 64.2, 55.9, 55.6, 52.8, 51.3, 28.9, 22.9.

HRMS (ESI): calcd for  $\text{C}_{16}\text{H}_{22}\text{NO}_4$   $[\text{M}+\text{H}]^+$  292.1549, found 292.1550.

**methyl (*E*)-(3-(3-hydroxy-2-methoxyphenyl)allyl)-*L*-prolinate (4f)**

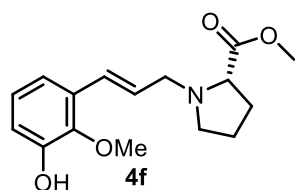

Compound **4f** was obtained as a colorless oil (44 mg, 28% yield).

$^1\text{H NMR}$  (400 MHz,  $\text{DMSO-}d_6$ )  $\delta$  9.31 (s, 1H), 6.94 (d,  $J = 7.6$  Hz, 1H), 6.86 (t,  $J = 7.8$  Hz, 1H), 6.74 (d,  $J = 7.7$  Hz, 1H), 6.68 (d,  $J = 16.0$  Hz, 1H), 6.23 (dt,  $J = 14.0$ , 6.4 Hz, 1H), 3.66 (s, 3H), 3.56 (s, 3H), 3.42 – 3.38 (m, 1H), 3.29 – 3.18 (m, 2H), 3.02 – 2.93 (m, 1H), 2.43 (q,  $J = 8.1$  Hz, 1H), 2.11 – 1.96 (m, 1H), 1.84 – 1.68 (m, 3H).

$^{13}\text{C NMR}$  (101 MHz,  $\text{DMSO-}d_6$ )  $\delta$  174.0, 150.4, 145.0, 130.5, 128.2, 126.0, 124.1, 116.4, 115.7, 64.2, 60.1, 56.2, 52.8, 51.4, 29.0, 23.0.

HRMS (ESI): calcd for  $\text{C}_{16}\text{H}_{22}\text{NO}_4$   $[\text{M}+\text{H}]^+$  292.1549, found 292.1553.

**methyl (*E*)-(3-(2-hydroxy-3-methoxyphenyl)allyl)-*L*-prolinate (5f)**

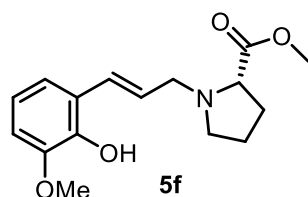

Compound **5f** was obtained as a colorless oil (36 mg, 23% yield).

$^1\text{H}$  NMR (400 MHz,  $\text{DMSO-}d_6$ )  $\delta$  8.74 (s, 1H), 6.99 (d,  $J = 7.8$  Hz, 1H), 6.82 (d,  $J = 7.9$  Hz, 1H), 6.77 – 6.67 (m, 2H), 6.21 (dt,  $J = 15.1, 6.8$  Hz, 1H), 3.78 (s, 3H), 3.56 (s, 3H), 3.37 – 3.34 (m, 1H), 3.26 – 3.15 (m, 2H), 3.02 – 2.91 (m, 1H), 2.40 (q,  $J = 8.0$  Hz, 1H), 2.10 – 1.97 (m, 1H), 1.84 – 1.67 (m, 3H).

$^{13}\text{C}$  NMR (101 MHz,  $\text{DMSO-}d_6$ )  $\delta$  174.0, 147.8, 143.6, 126.9, 126.4, 123.8, 118.8, 118.2, 110.5, 64.2, 56.5, 55.8, 52.8, 51.4, 28.9, 23.0.

HRMS (ESI): calcd for  $\text{C}_{16}\text{H}_{22}\text{NO}_4$   $[\text{M}+\text{H}]^+$  292.1549, found 292.1552.

**methyl (*E*)-(3-(4-hydroxy-2-methoxyphenyl)allyl)-*L*-prolinate (6f)**

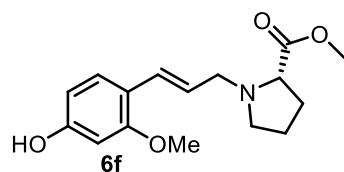

Compound **6f** was obtained as a colorless oil (31 mg, 20% yield).

$^1\text{H}$  NMR (600 MHz,  $\text{DMSO-}d_6$ )  $\delta$  9.51 (s, 1H), 7.22 (d,  $J = 8.4$  Hz, 1H), 6.58 (d,  $J = 15.9$  Hz, 1H), 6.37 (d,  $J = 2.3$  Hz, 1H), 6.32 (dd,  $J = 8.4, 2.3$  Hz, 1H), 6.02 (dt,  $J = 16.0, 6.8$  Hz, 1H), 3.73 (s, 3H), 3.56 (s, 3H), 3.32 – 3.29 (m, 1H), 3.21 – 3.13 (m, 2H), 2.98 – 2.92 (m, 1H), 2.39 (q,  $J = 8.2$  Hz, 1H), 2.07 – 2.00 (m, 1H), 1.81 – 1.69 (m, 3H).

$^{13}\text{C}$  NMR (151 MHz,  $\text{DMSO-}d_6$ )  $\delta$  174.0, 158.3, 157.3, 127.2, 126.1, 124.0, 116.3, 107.4, 98.9, 64.1, 56.5, 55.2, 52.7, 51.3, 28.9, 22.9.

HRMS (ESI): calcd for  $\text{C}_{16}\text{H}_{22}\text{NO}_4$   $[\text{M}+\text{H}]^+$  292.1549, found 292.1542.

**methyl (*E*)-(3-(2-hydroxy-4-methoxyphenyl)allyl)-*L*-prolinate (7f)**

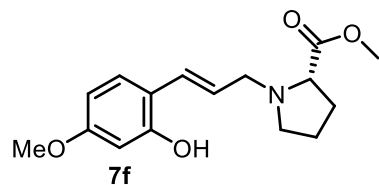

Compound **7f** was obtained as a colorless oil (47 mg, 30% yield).

$^1\text{H}$  NMR (400 MHz,  $\text{DMSO-}d_6$ )  $\delta$  9.64 (s, 1H), 7.27 (dd,  $J = 8.5, 1.7$  Hz, 1H), 6.60 (d,  $J = 15.9$  Hz, 1H), 6.36 (dd,  $J = 10.7, 2.2$  Hz, 2H), 6.08 (ddd,  $J = 16.9, 7.7, 6.0$  Hz, 1H), 3.68 (s, 3H), 3.57 (s, 3H), 3.34 – 3.29 (m, 1H), 3.22 – 3.12 (m, 2H), 3.00 – 2.92 (m, 1H), 2.43 – 2.34 (m, 1H), 2.09 – 1.98 (m, 1H), 1.83 – 1.66 (m, 3H).

$^{13}\text{C}$  NMR (101 MHz, DMSO-*d*<sub>6</sub>)  $\delta$  174.0, 159.5, 155.6, 127.4, 126.4, 124.1, 116.6, 105.1, 101.1, 64.2, 56.6, 54.9, 52.7, 51.3, 28.9, 22.9.

HRMS (ESI): calcd for C<sub>16</sub>H<sub>22</sub>NO<sub>4</sub> [M+H]<sup>+</sup> 292.1549, found 292.1543.

### 3. Spectra

<sup>1</sup>H NMR (400 MHz, CDCl<sub>3</sub>) Spectrum of **4**

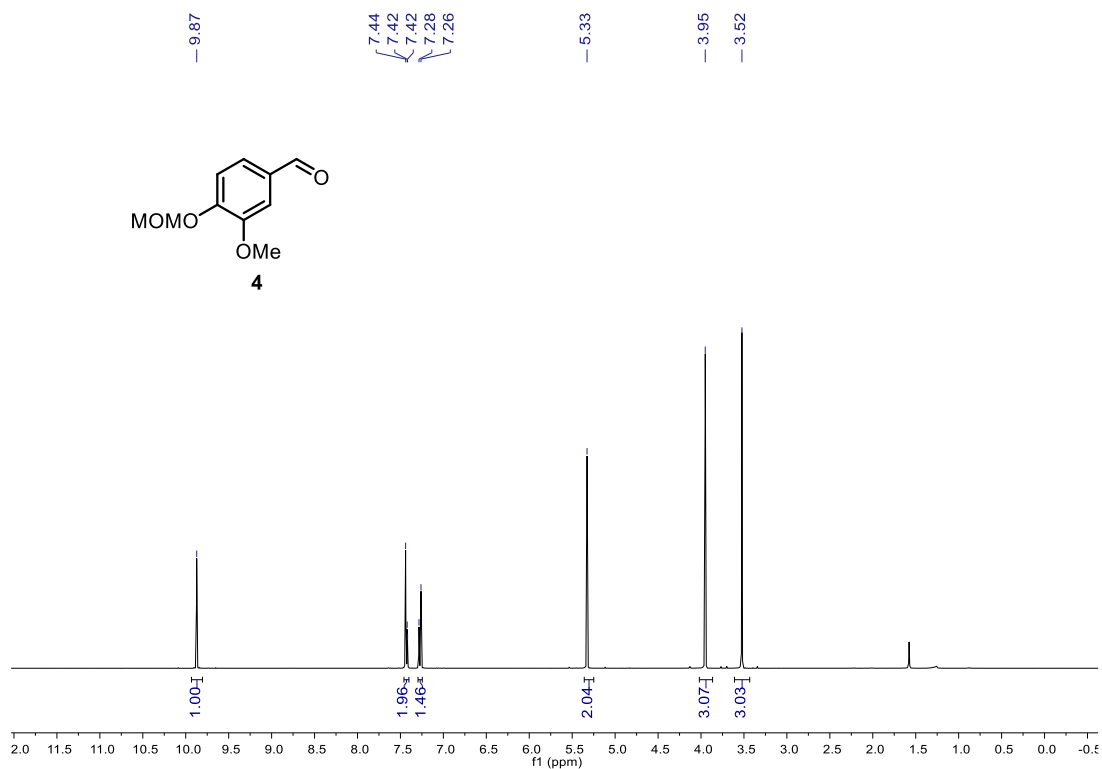

# HRMS of 4

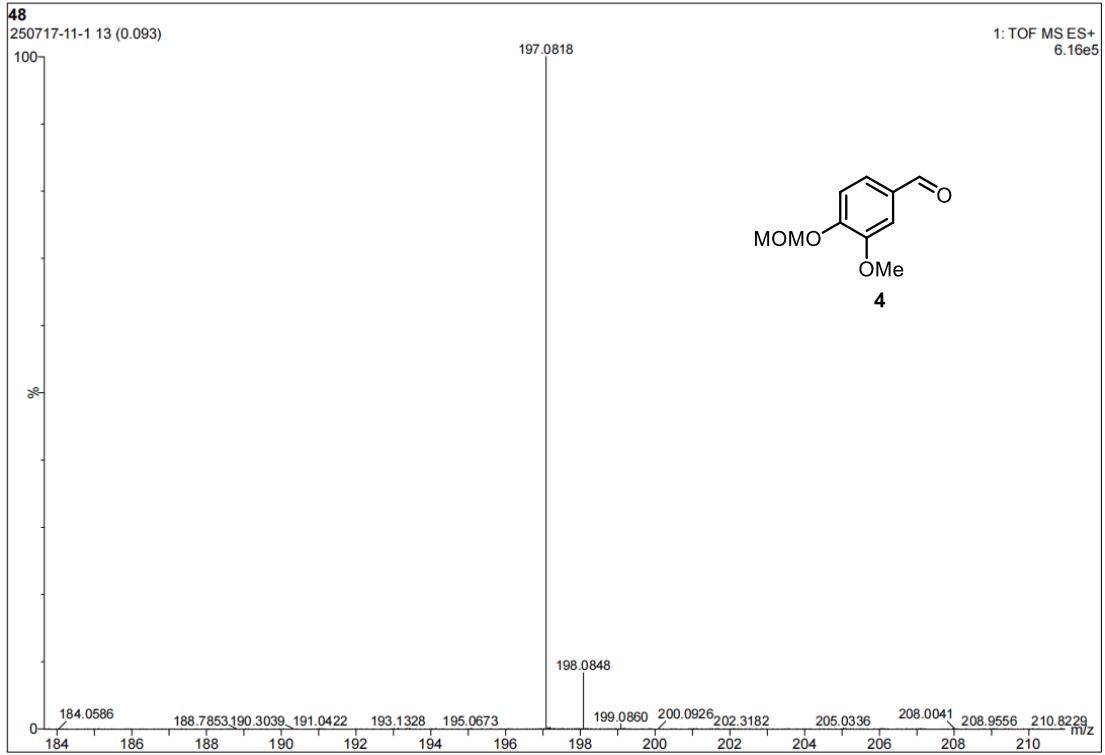

### <sup>1</sup>H NMR (400 MHz, CDCl<sub>3</sub>) Spectrum of 2

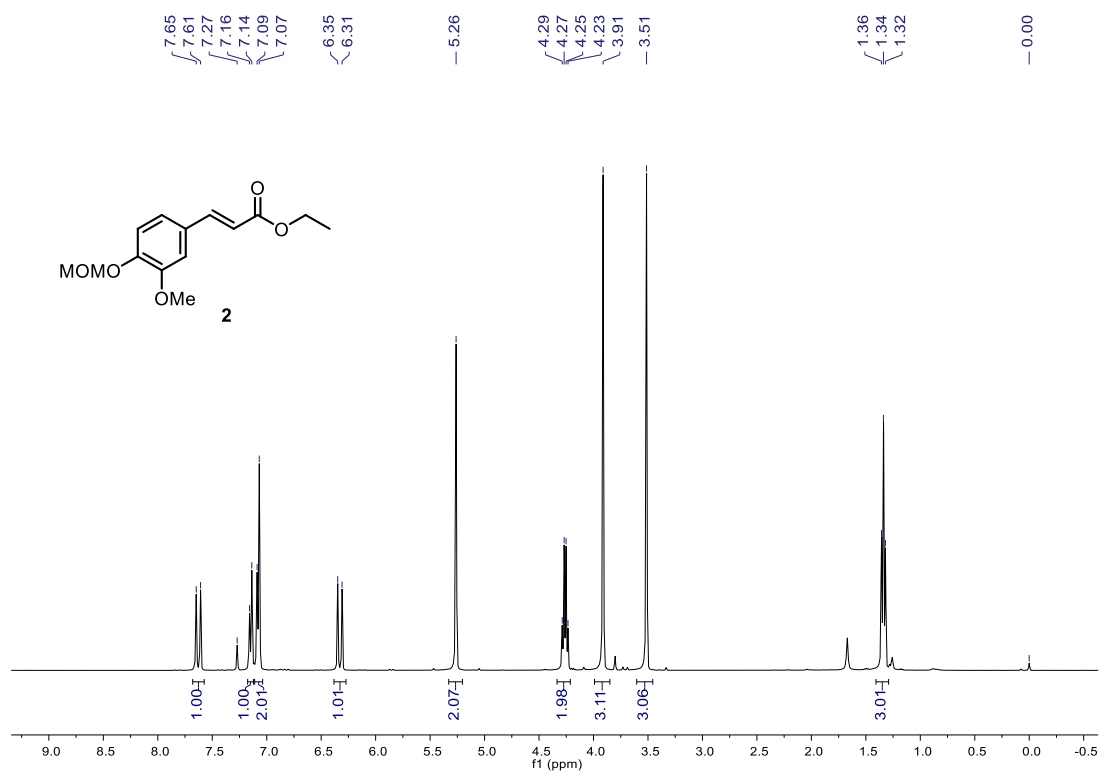

### <sup>13</sup>C NMR (101 MHz, CDCl<sub>3</sub>) Spectrum of 2

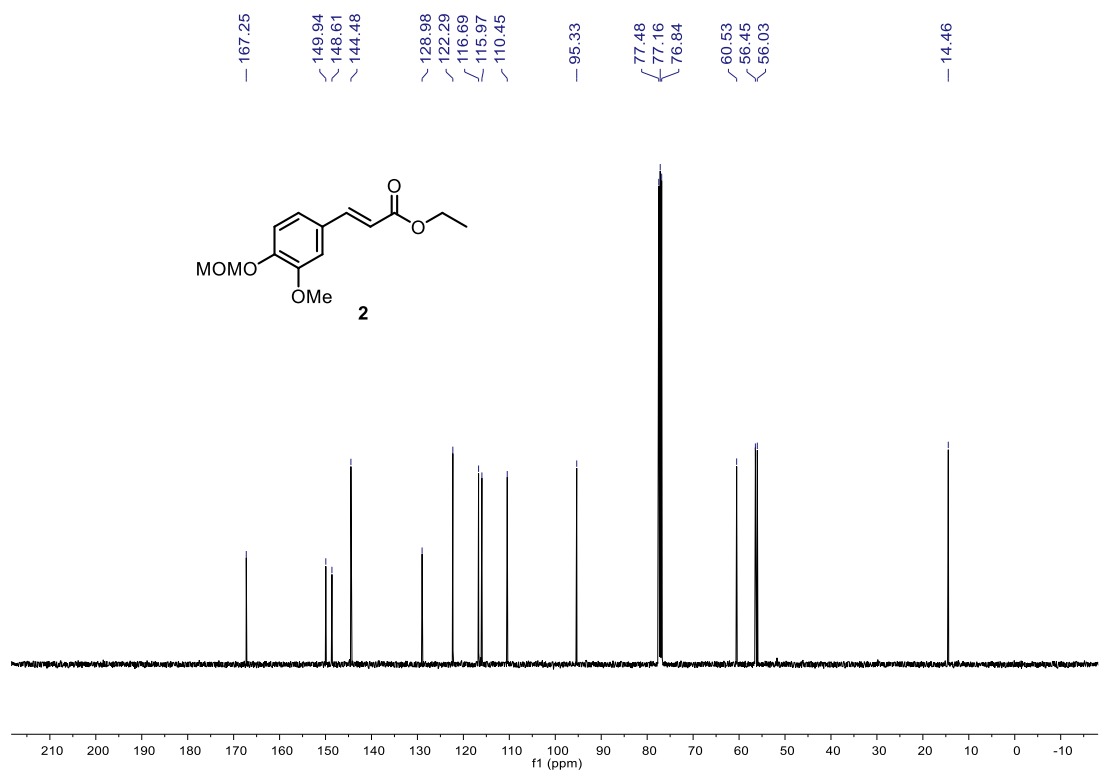

# HRMS of 2

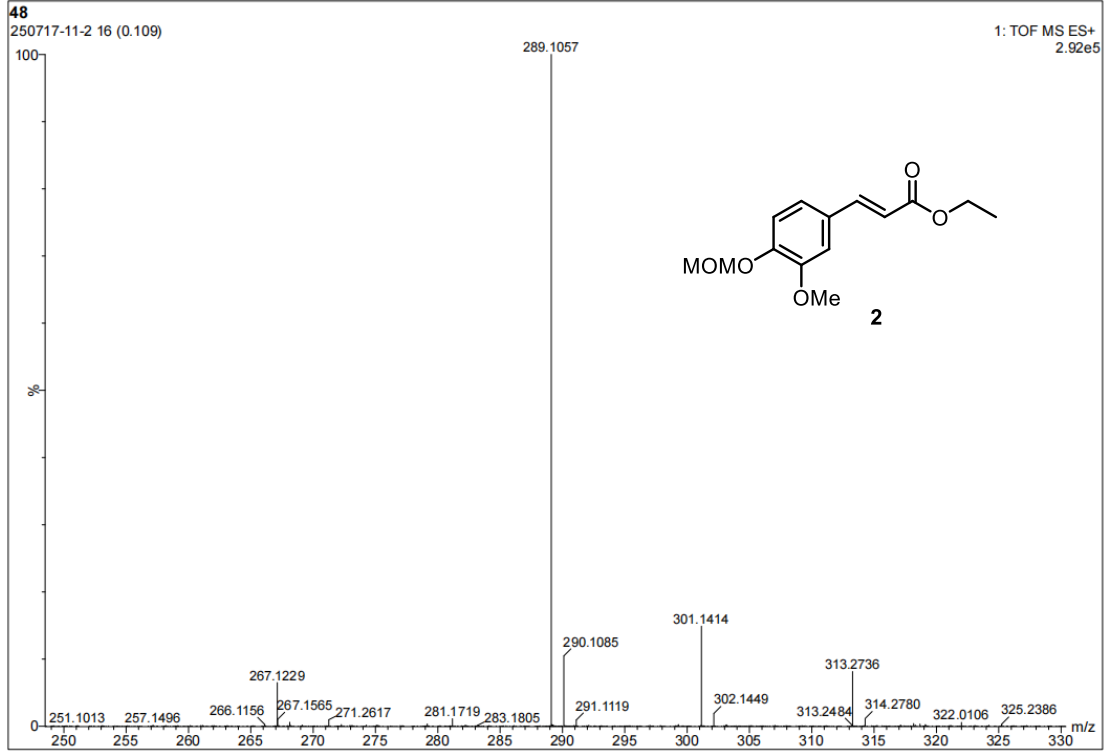

### <sup>1</sup>H NMR (400 MHz, CDCl<sub>3</sub>) Spectrum of 2a

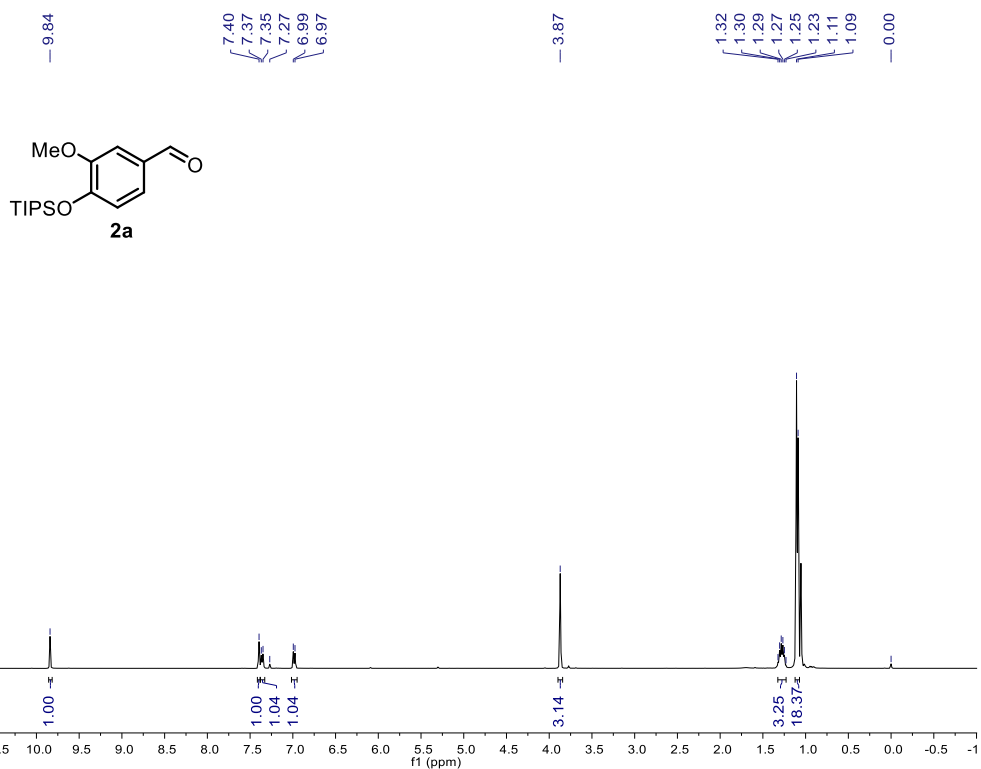

### <sup>13</sup>C NMR (101 MHz, CDCl<sub>3</sub>) Spectrum of 2a

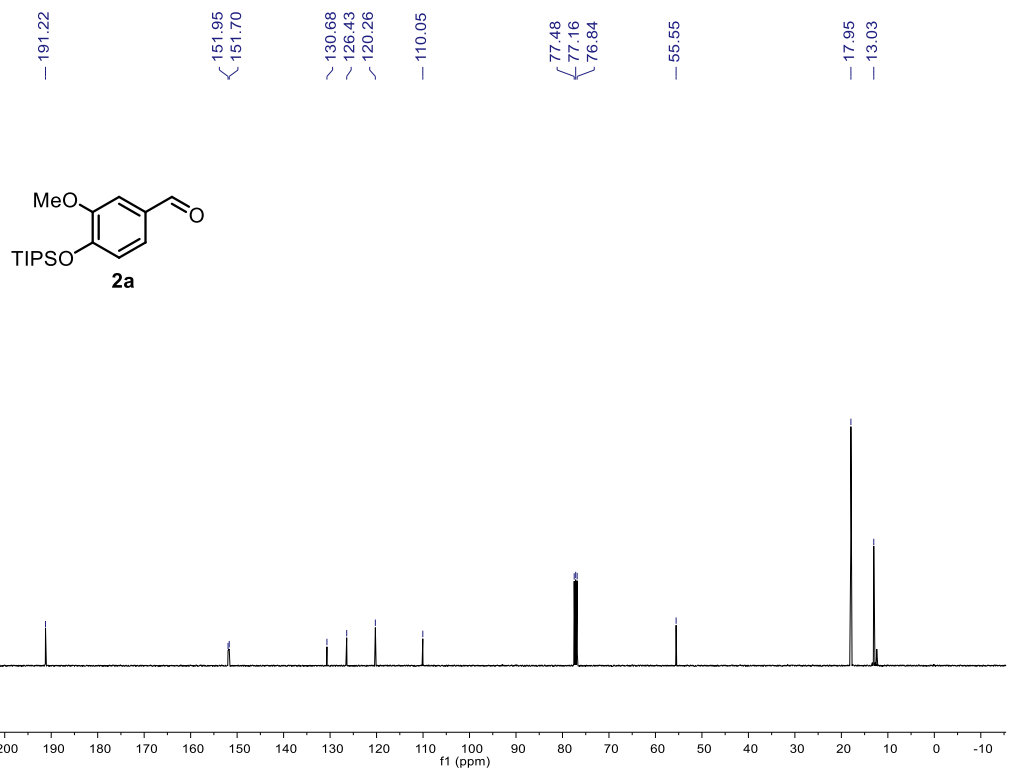

# HRMS of 2a

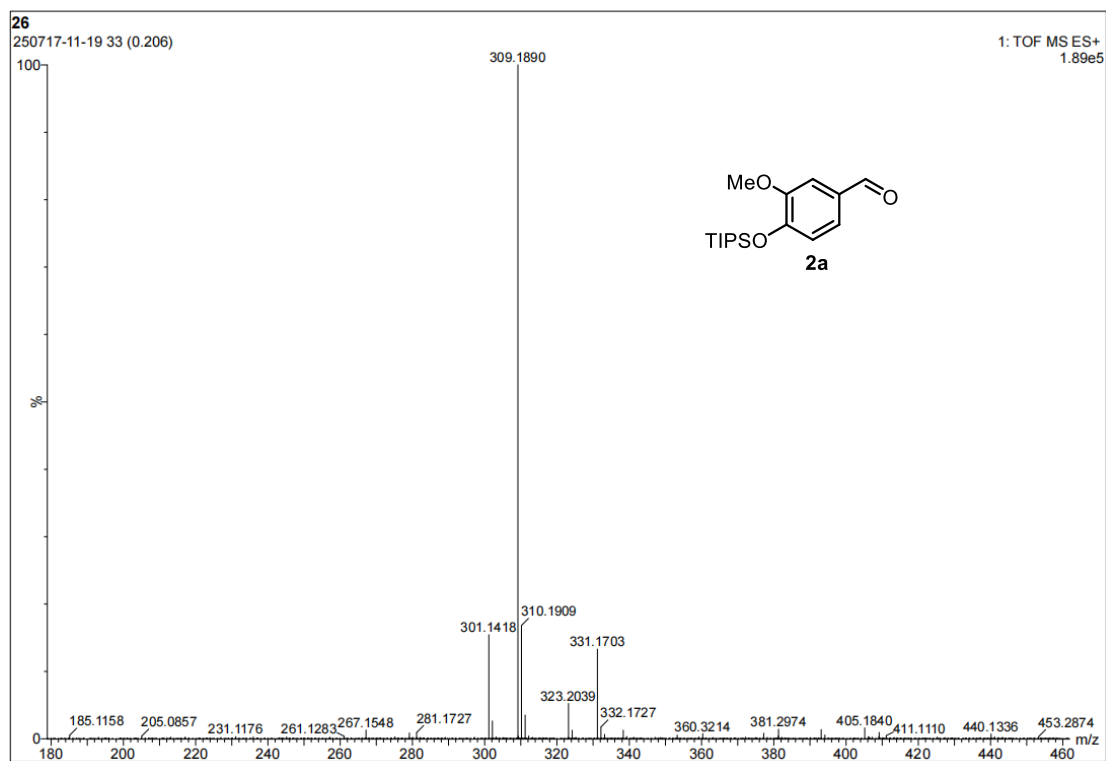

### <sup>1</sup>H NMR (400 MHz, CDCl<sub>3</sub>) Spectrum of 3a

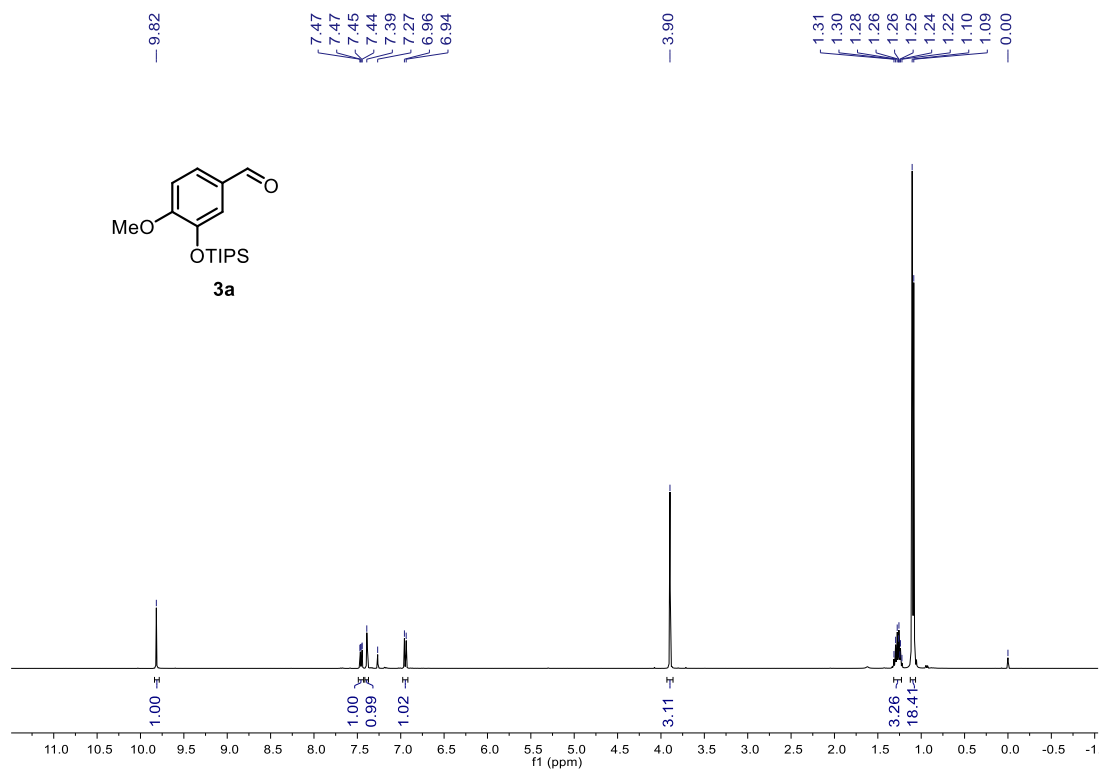

### <sup>13</sup>C NMR (101 MHz, CDCl<sub>3</sub>) Spectrum of 3a

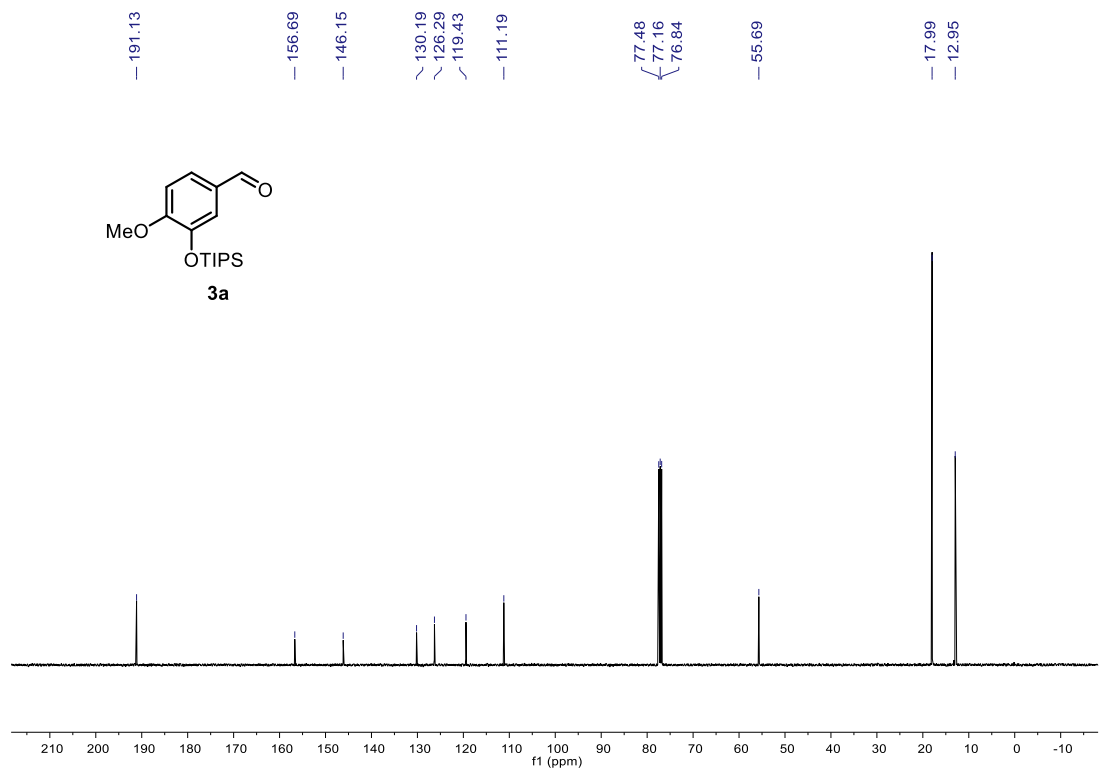

# HRMS of 3a

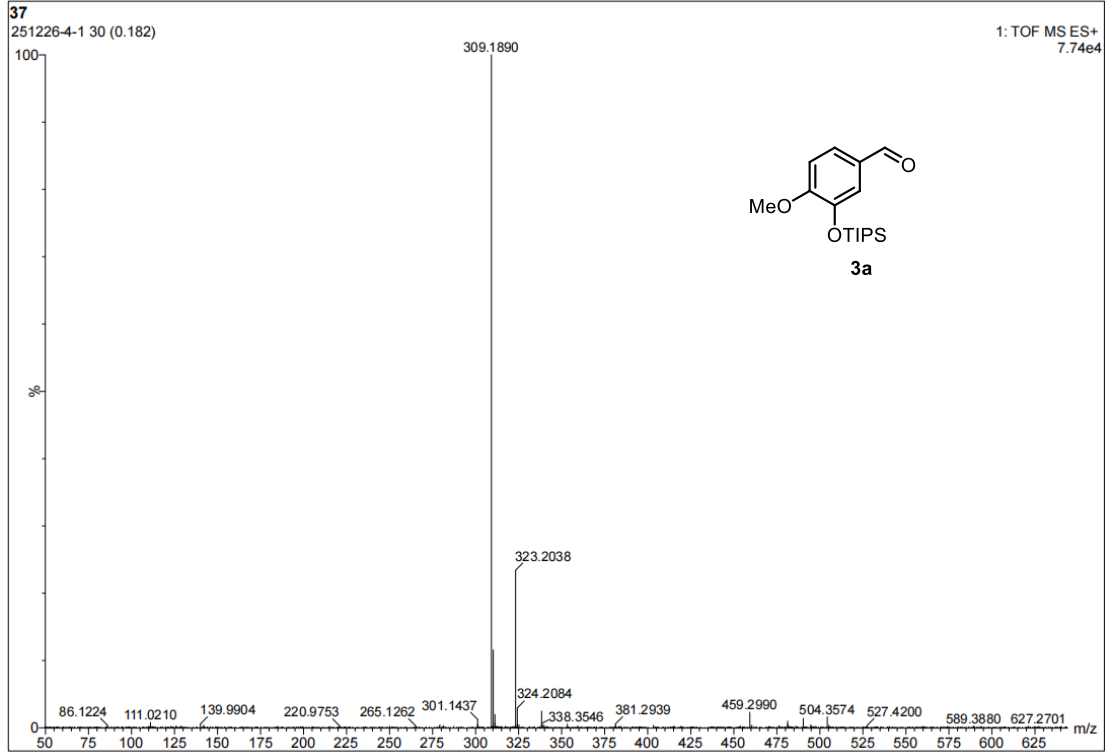

### <sup>1</sup>H NMR (400 MHz, CDCl<sub>3</sub>) Spectrum of 4a

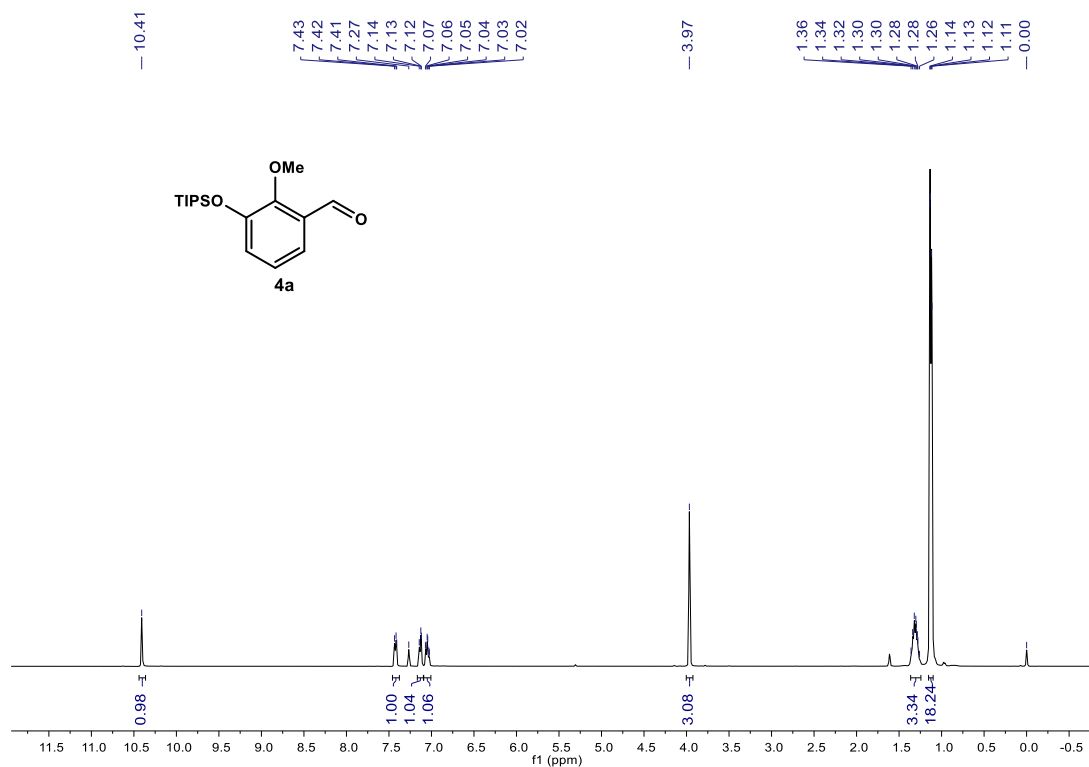

### <sup>13</sup>C NMR (101 MHz, CDCl<sub>3</sub>) Spectrum of 4a

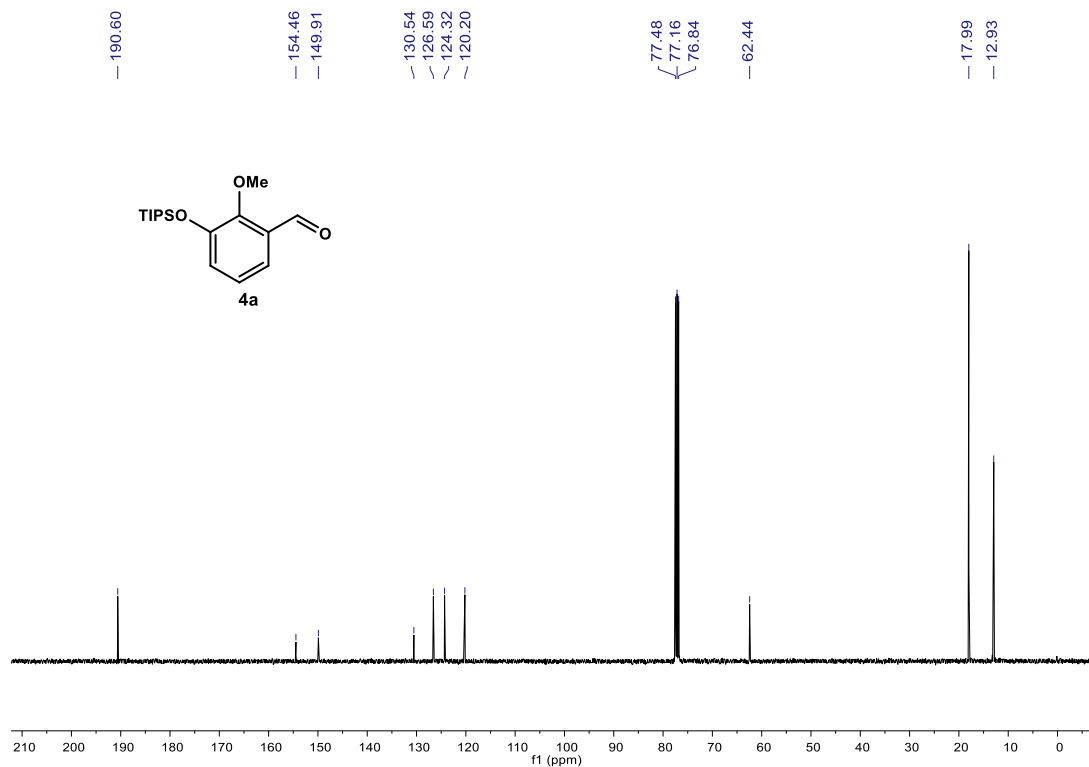

# HRMS of 4a

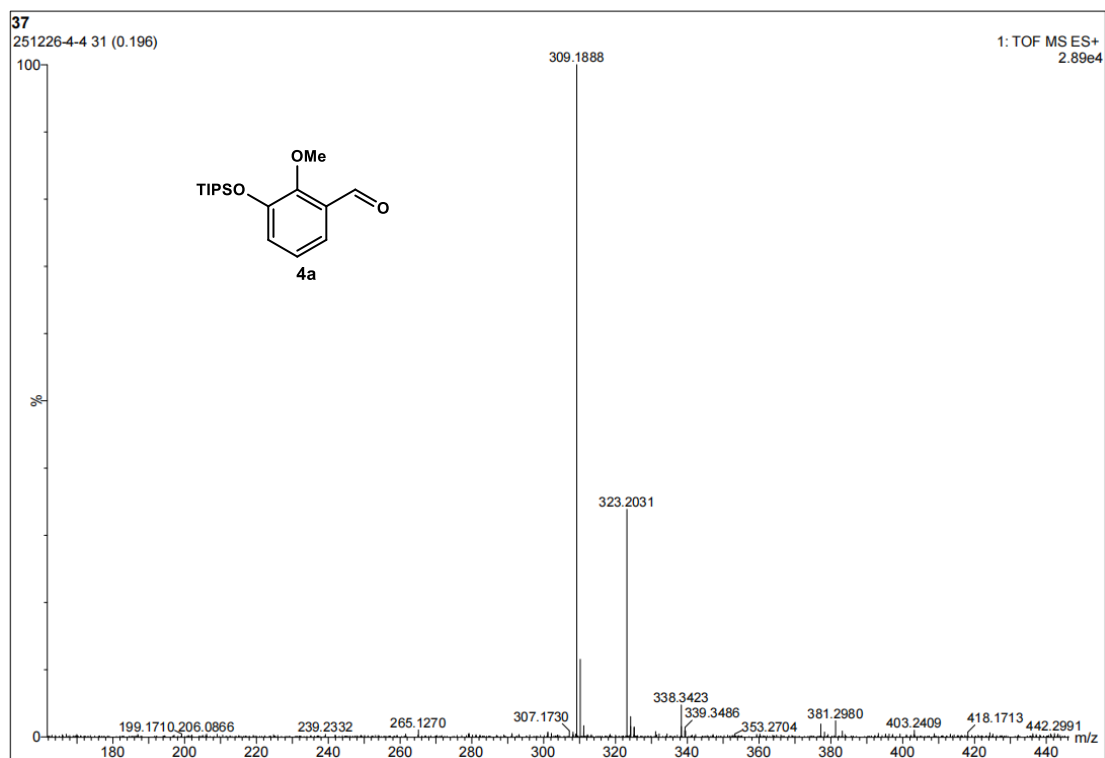

### <sup>1</sup>H NMR (400 MHz, CDCl<sub>3</sub>) Spectrum of 5a

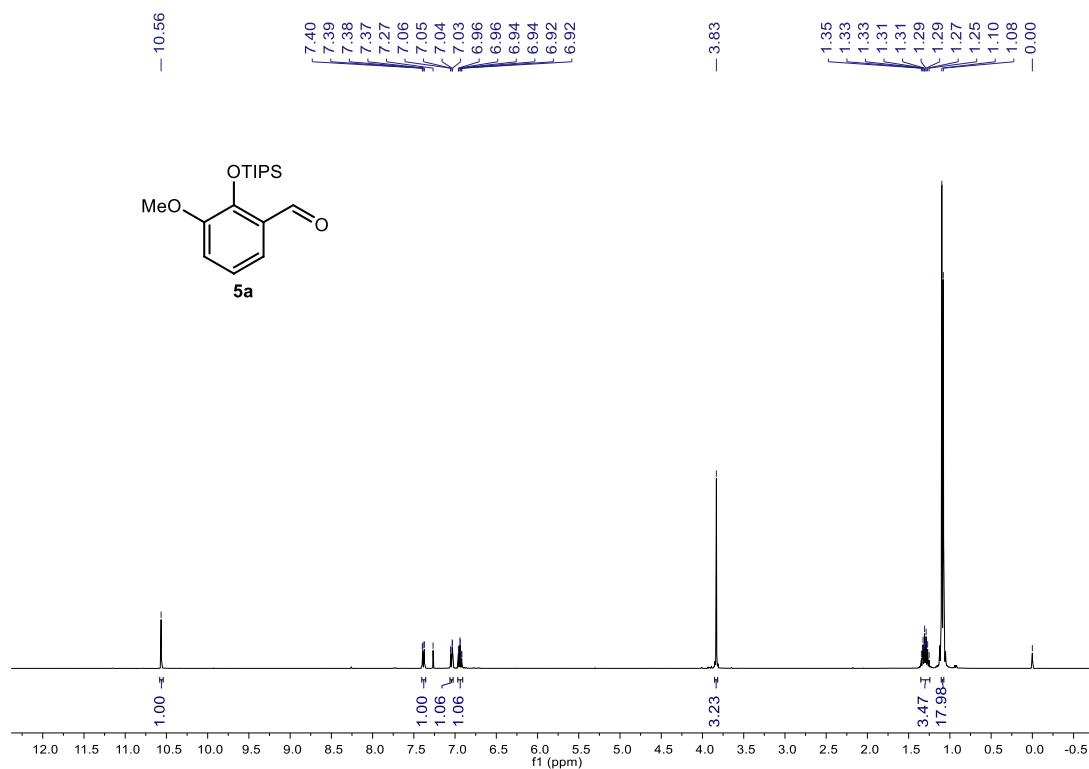

### <sup>13</sup>C NMR (101 MHz, CDCl<sub>3</sub>) Spectrum of 5a

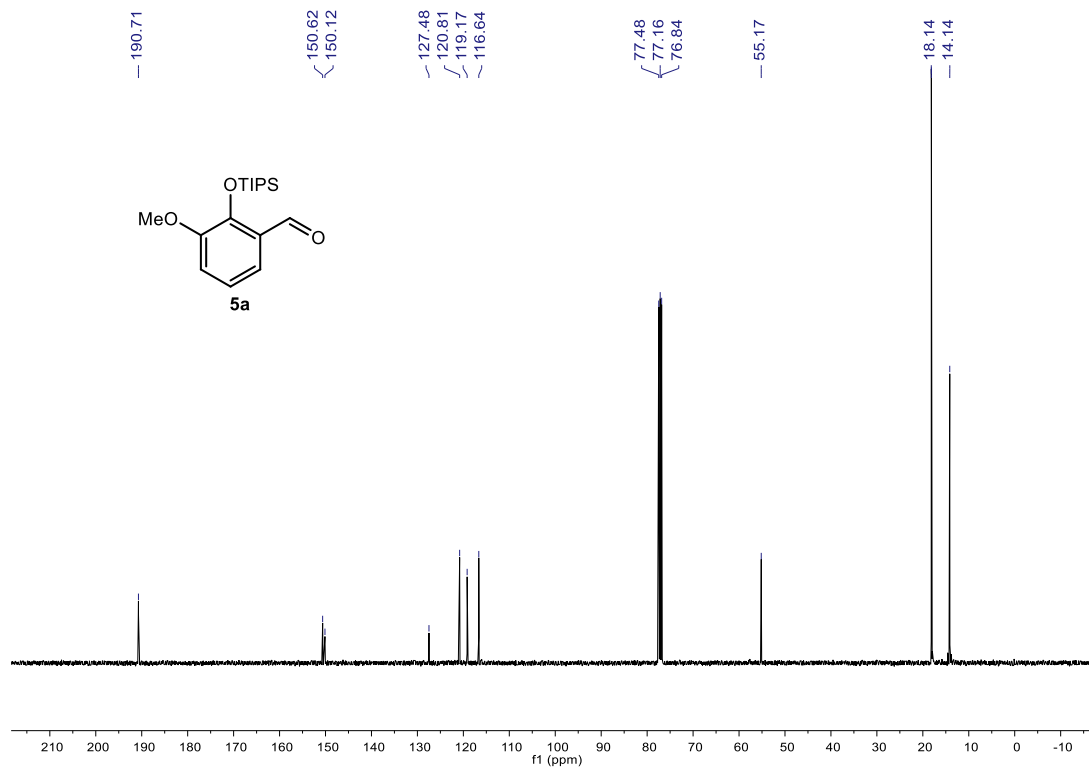

# HRMS of 5a

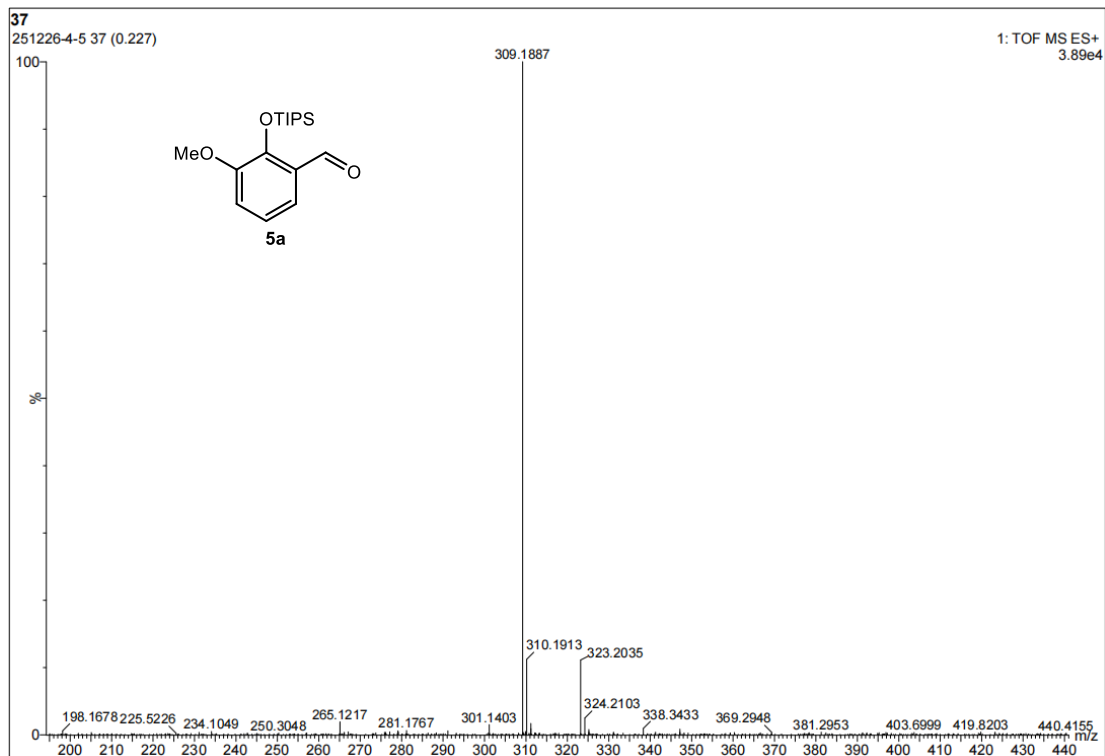

### <sup>1</sup>H NMR (400 MHz, CDCl<sub>3</sub>) Spectrum of 6a

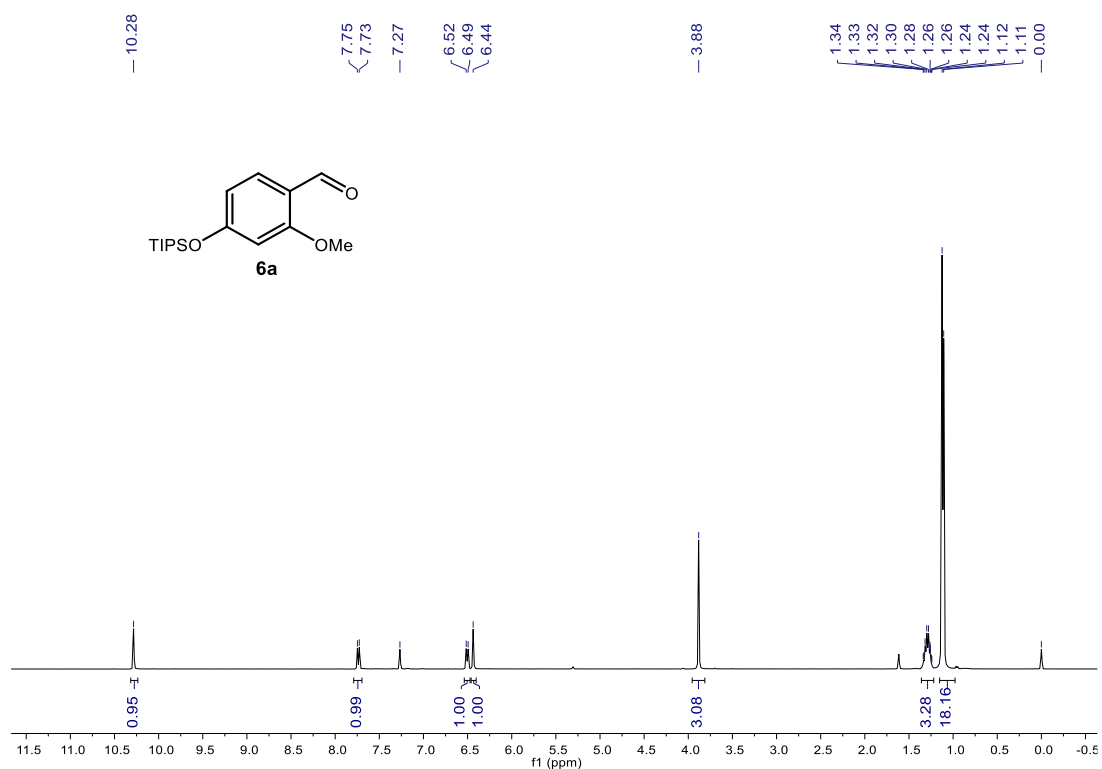

### <sup>13</sup>C NMR (101 MHz, CDCl<sub>3</sub>) Spectrum of 6a

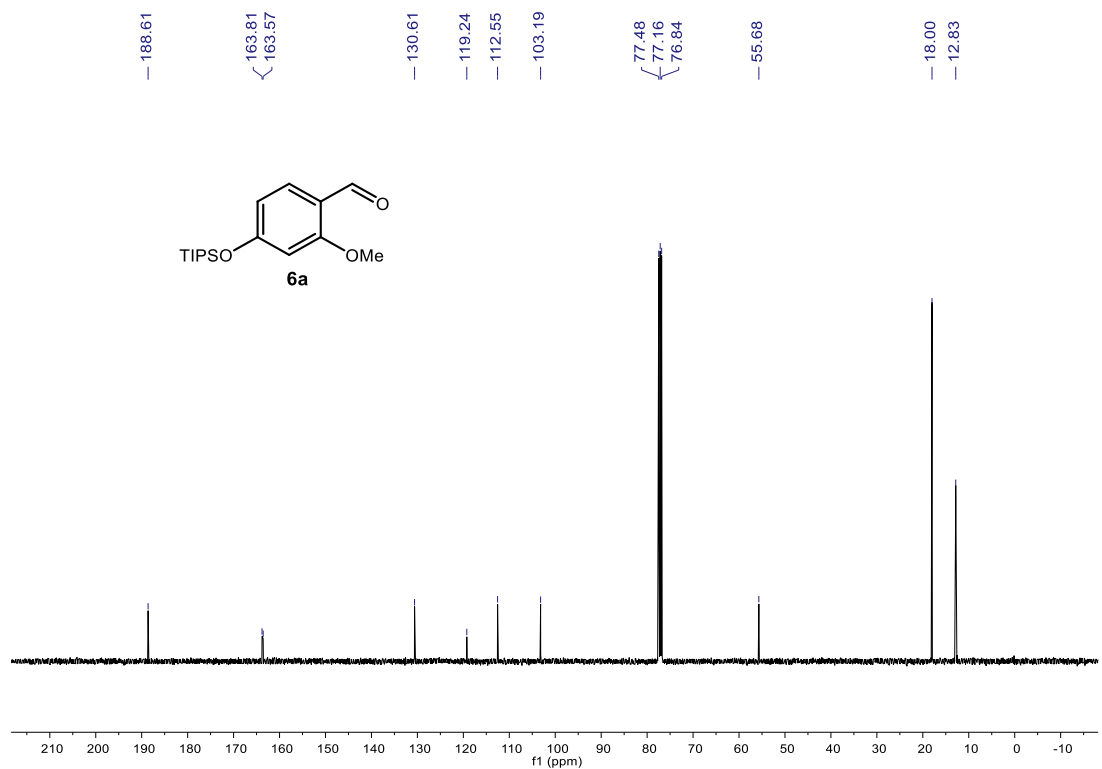

# HRMS of 6a

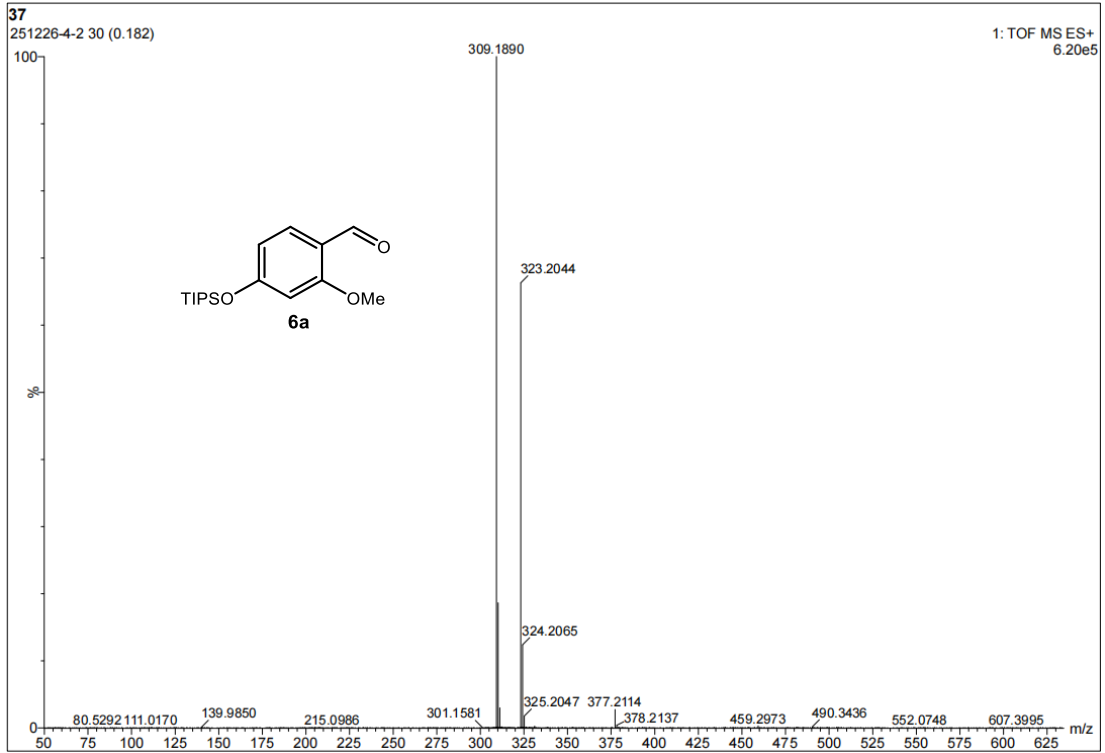

### <sup>1</sup>H NMR (400 MHz, CDCl<sub>3</sub>) Spectrum of 7a

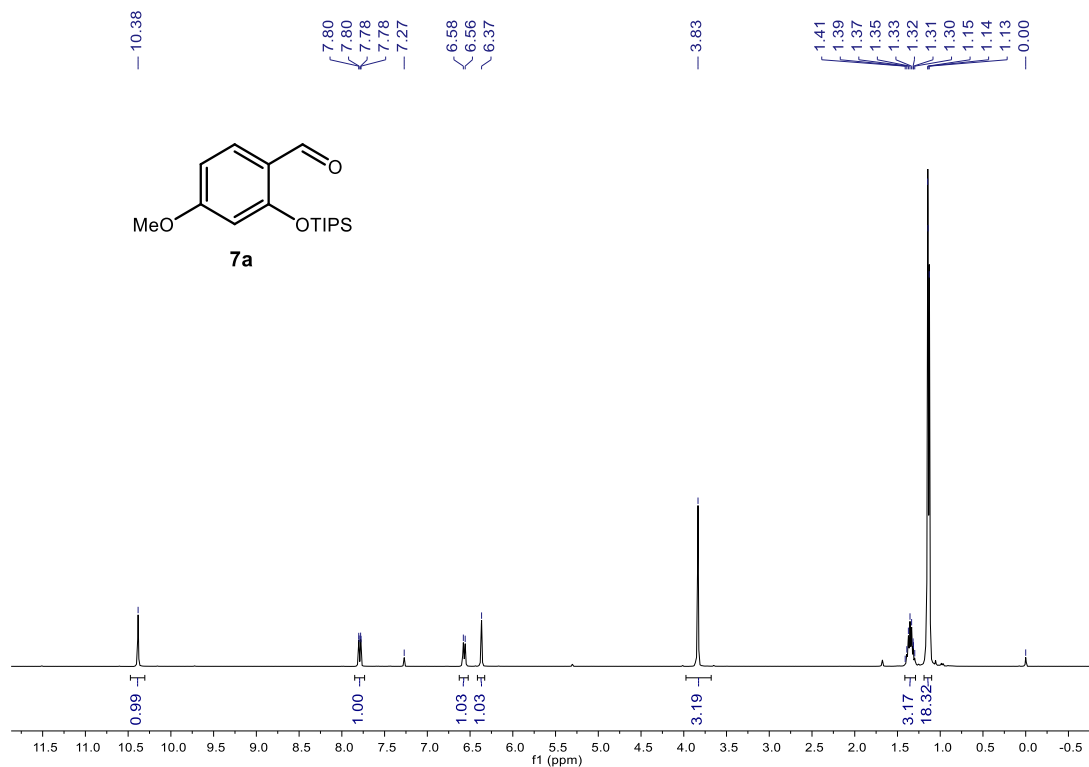

### <sup>13</sup>C NMR (101 MHz, CDCl<sub>3</sub>) Spectrum of 7a

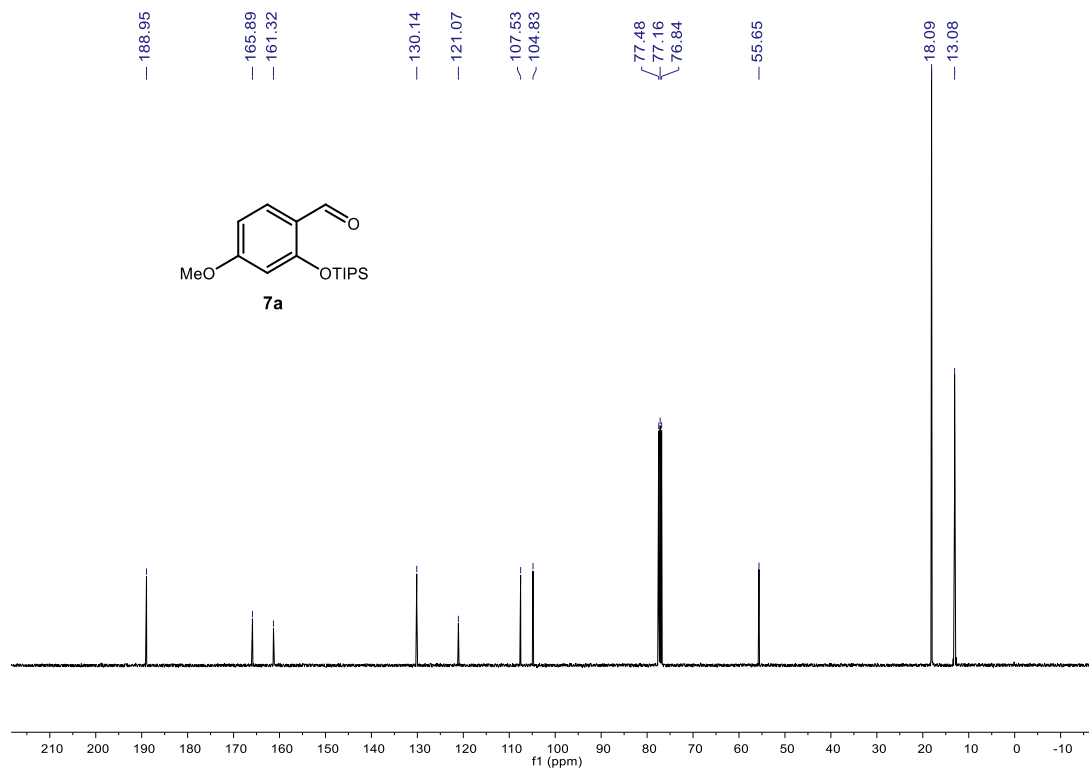

# HRMS of 7a

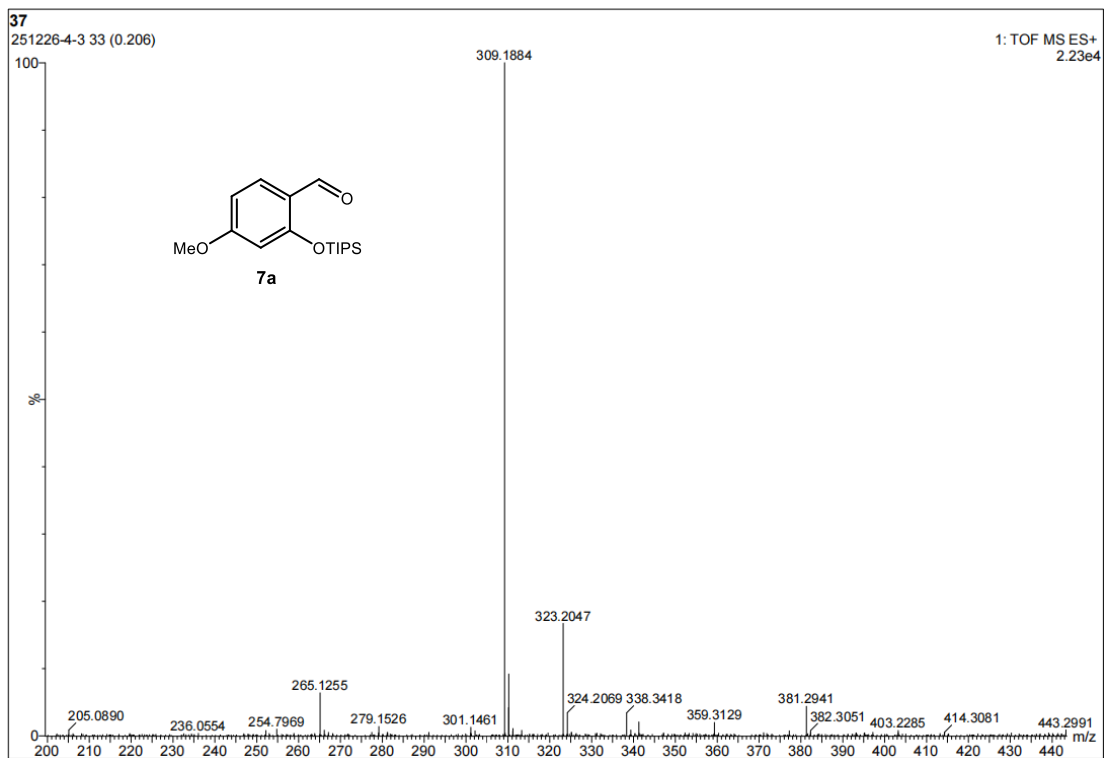

### <sup>1</sup>H NMR (400 MHz, CDCl<sub>3</sub>) Spectrum of 2b

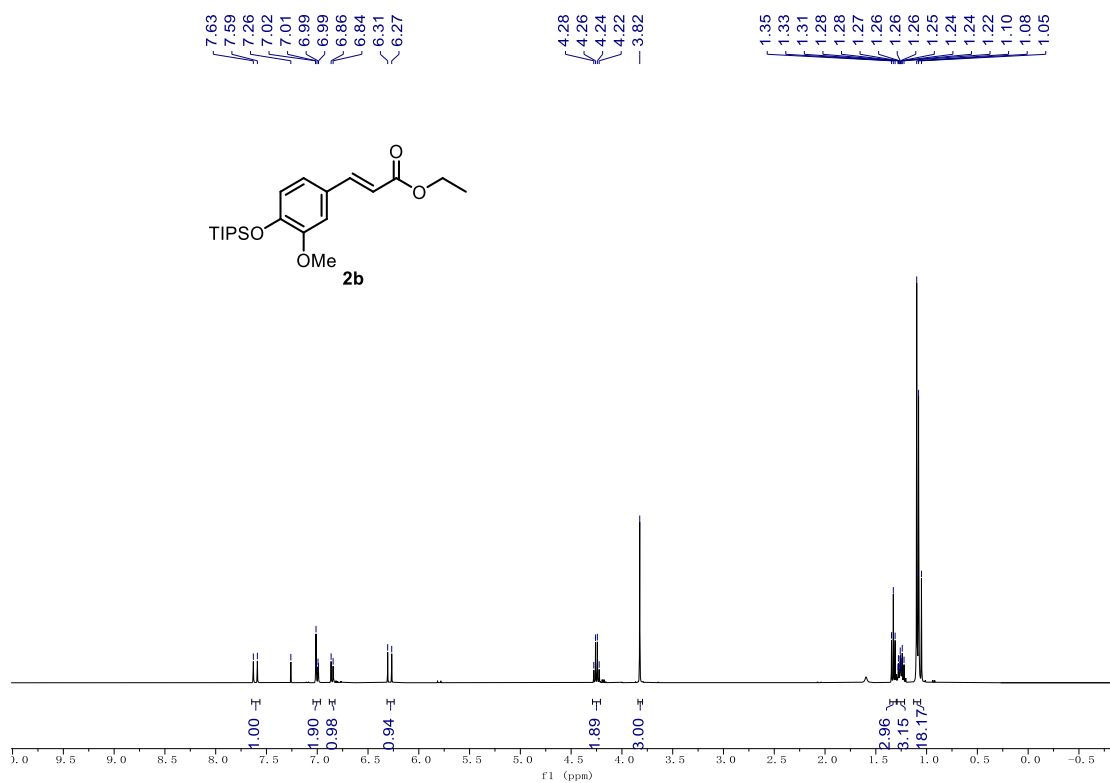

### <sup>13</sup>C NMR (101 MHz, CDCl<sub>3</sub>) Spectrum of 2b

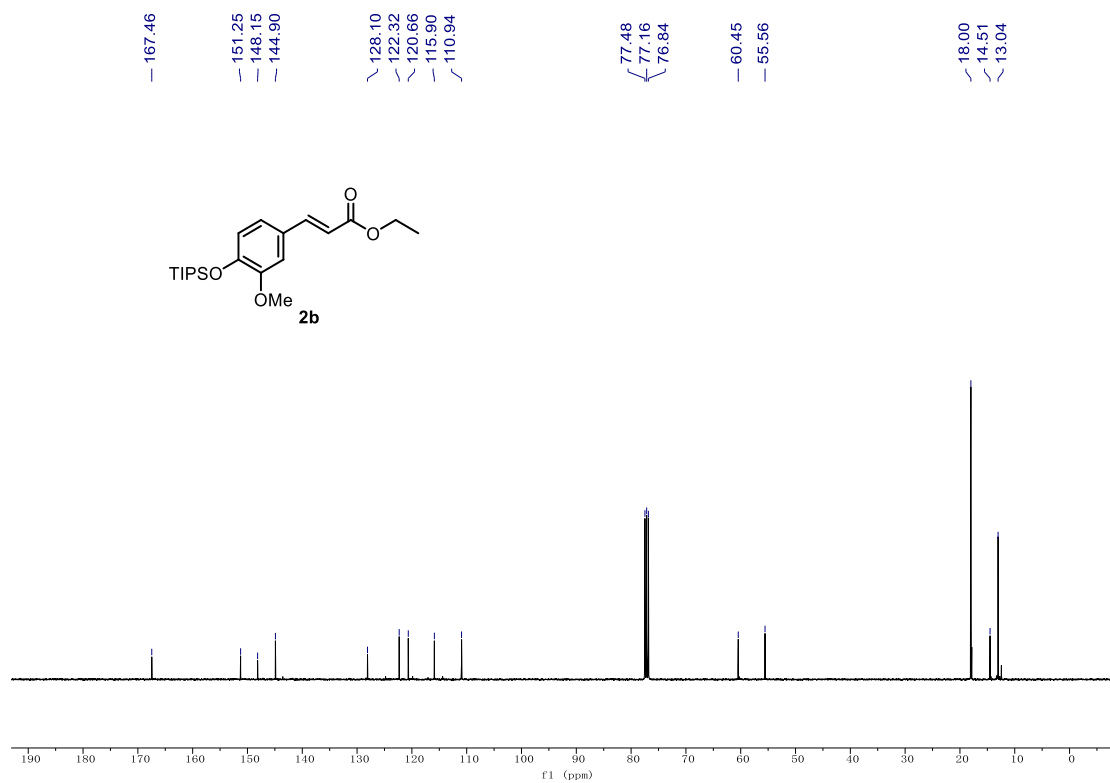

# HRMS of 2b

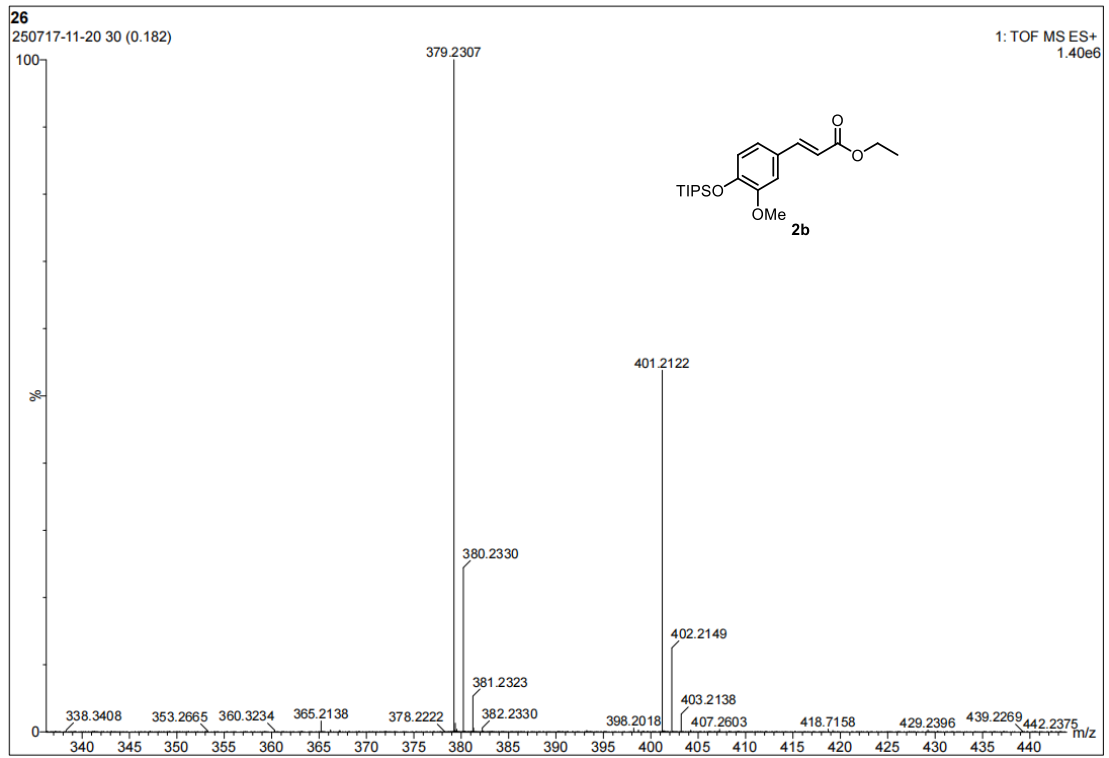

### <sup>1</sup>H NMR (400 MHz, CDCl<sub>3</sub>) Spectrum of 3b

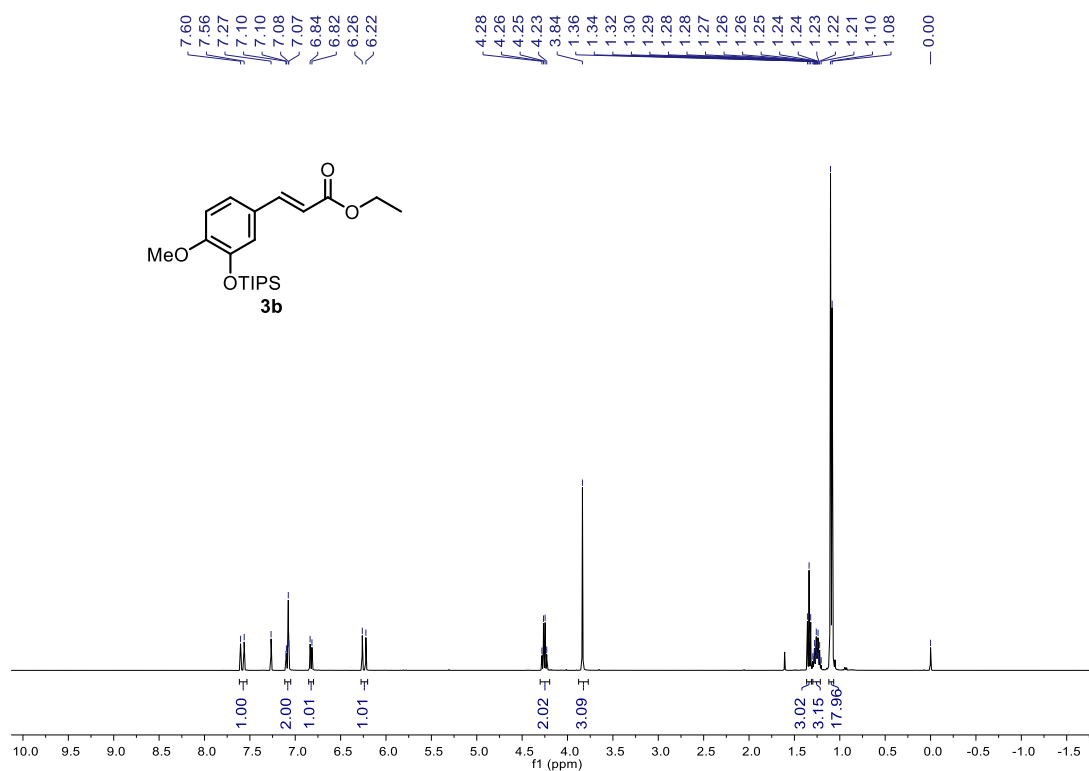

### <sup>13</sup>C NMR (101 MHz, CDCl<sub>3</sub>) Spectrum of 3b

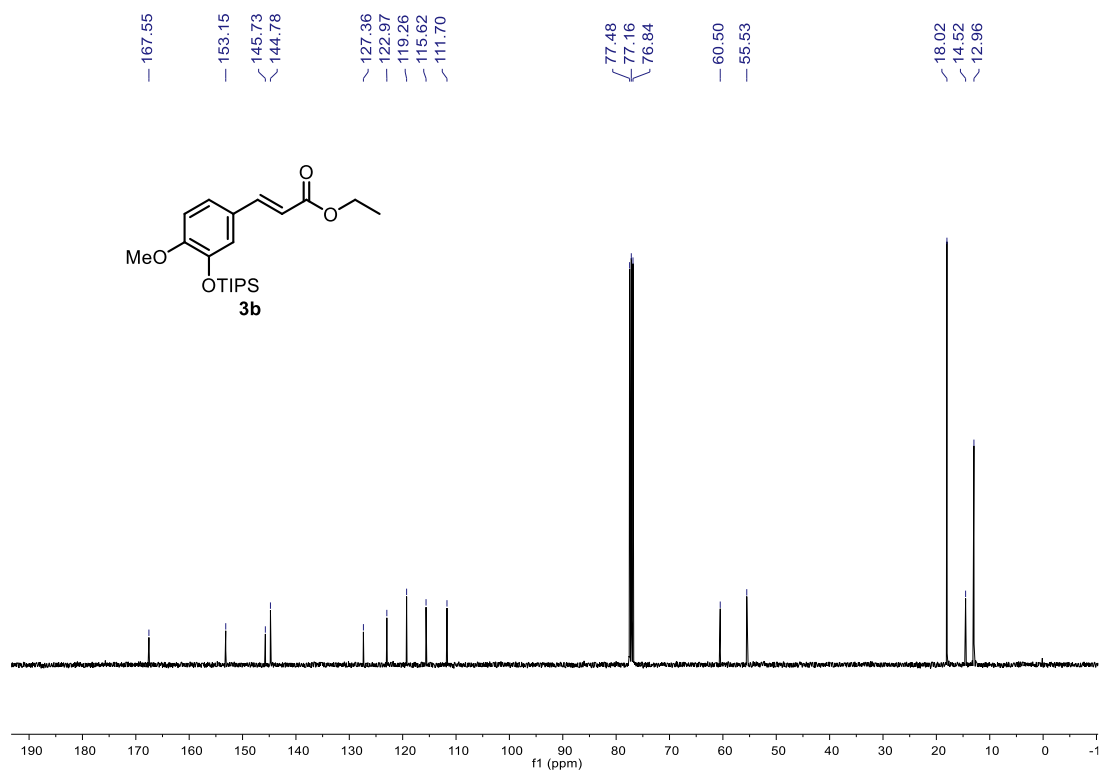

# HRMS of 3b

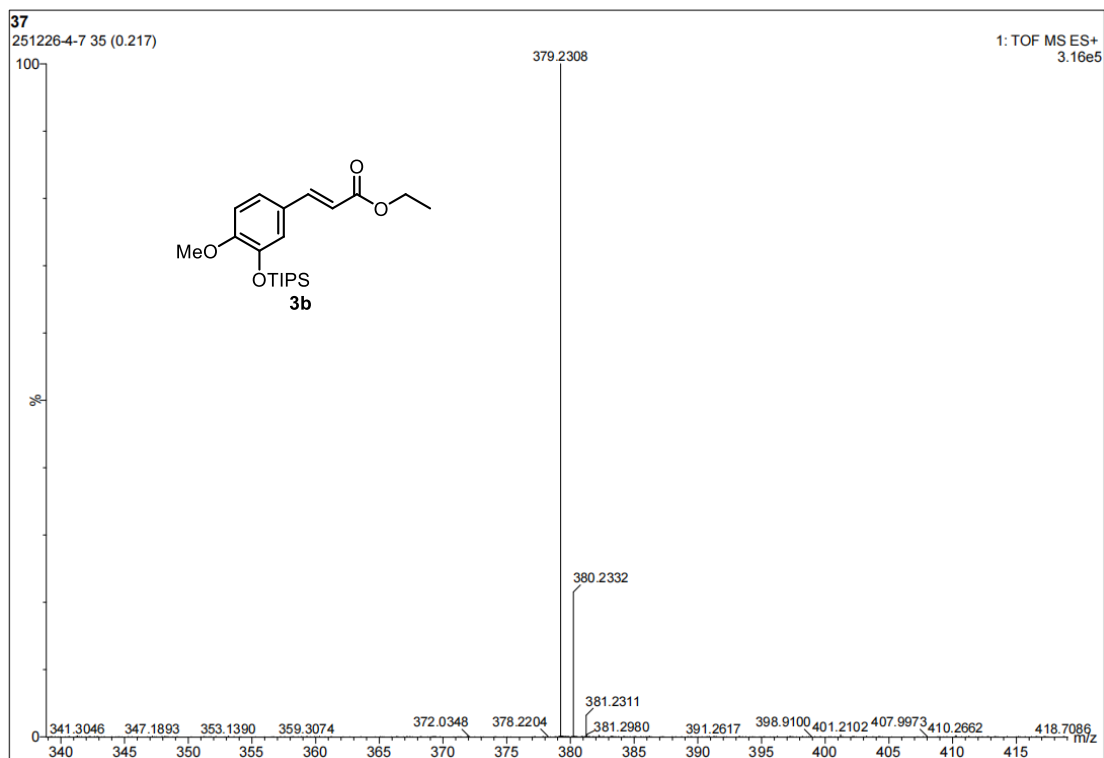

### <sup>1</sup>H NMR (400 MHz, CDCl<sub>3</sub>) Spectrum of 4b

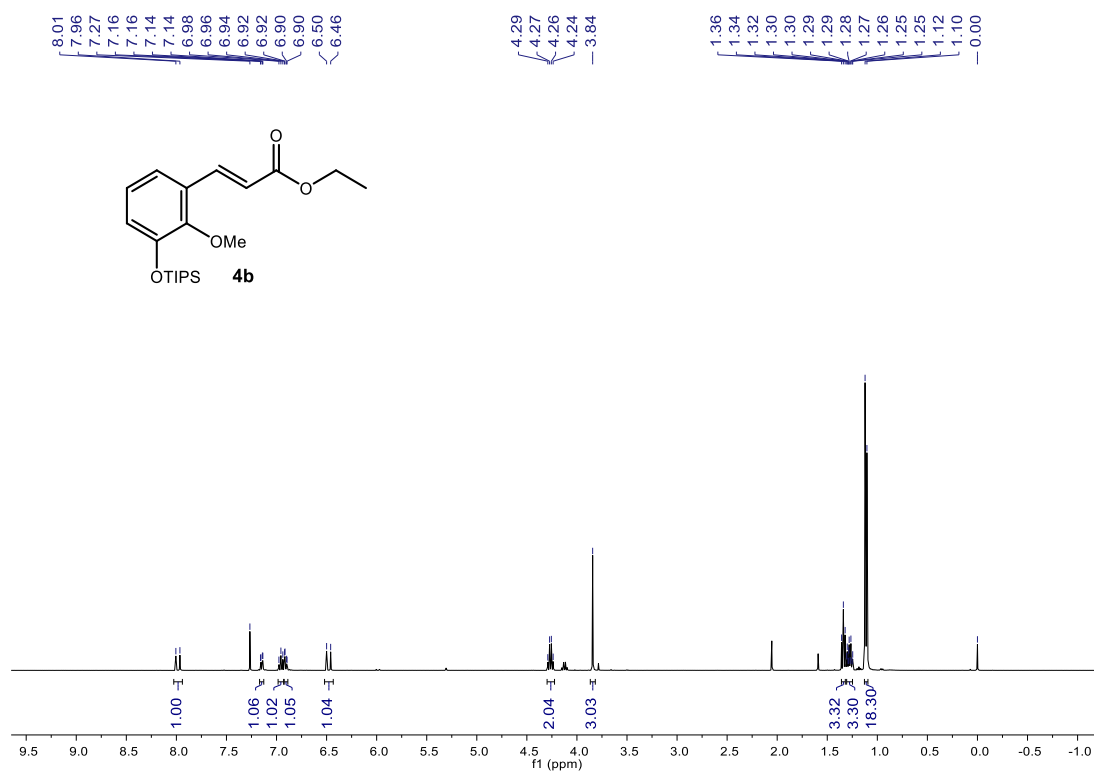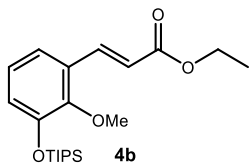

### <sup>13</sup>C NMR (101 MHz, CDCl<sub>3</sub>) Spectrum of 4b

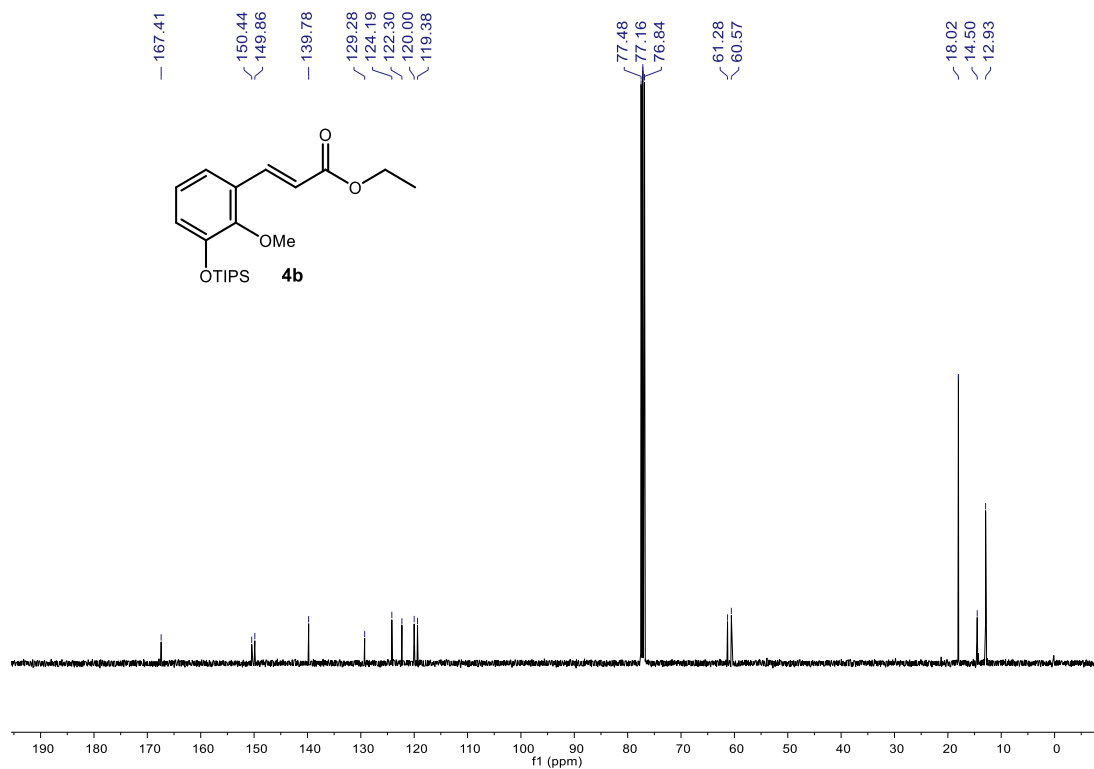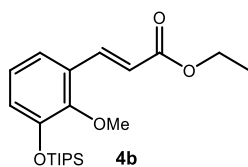

# HRMS of 4b

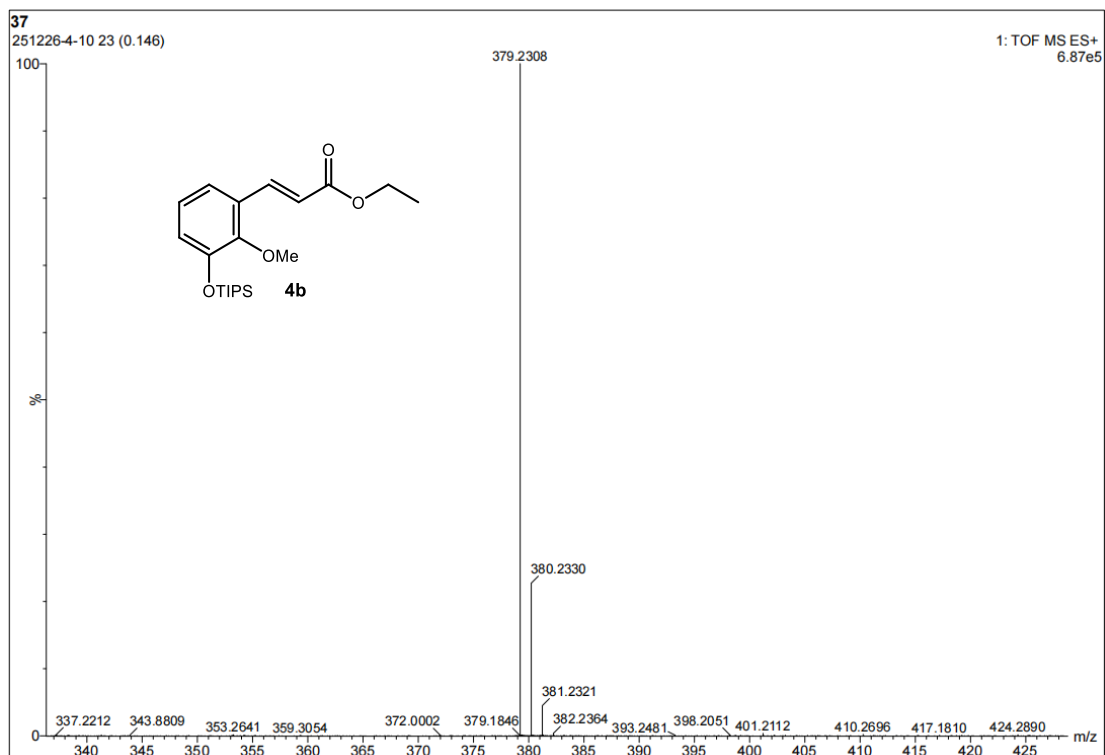

### <sup>1</sup>H NMR (400 MHz, CDCl<sub>3</sub>) Spectrum of 5b

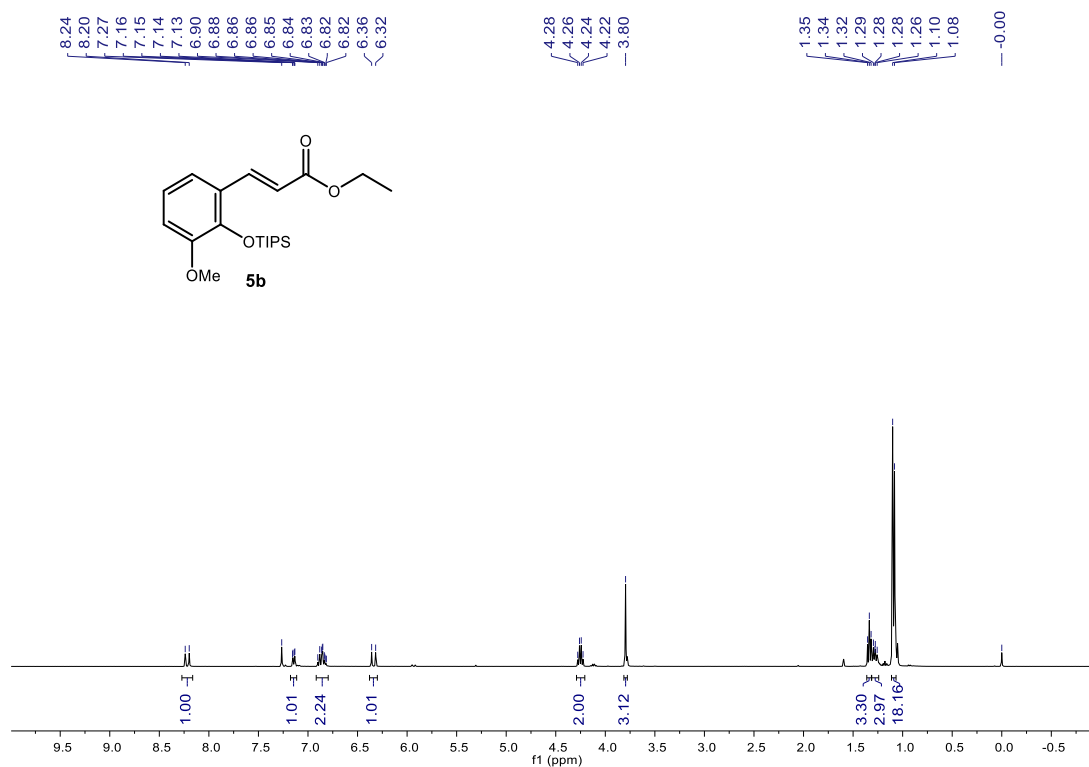

### <sup>13</sup>C NMR (101 MHz, CDCl<sub>3</sub>) Spectrum of 5b

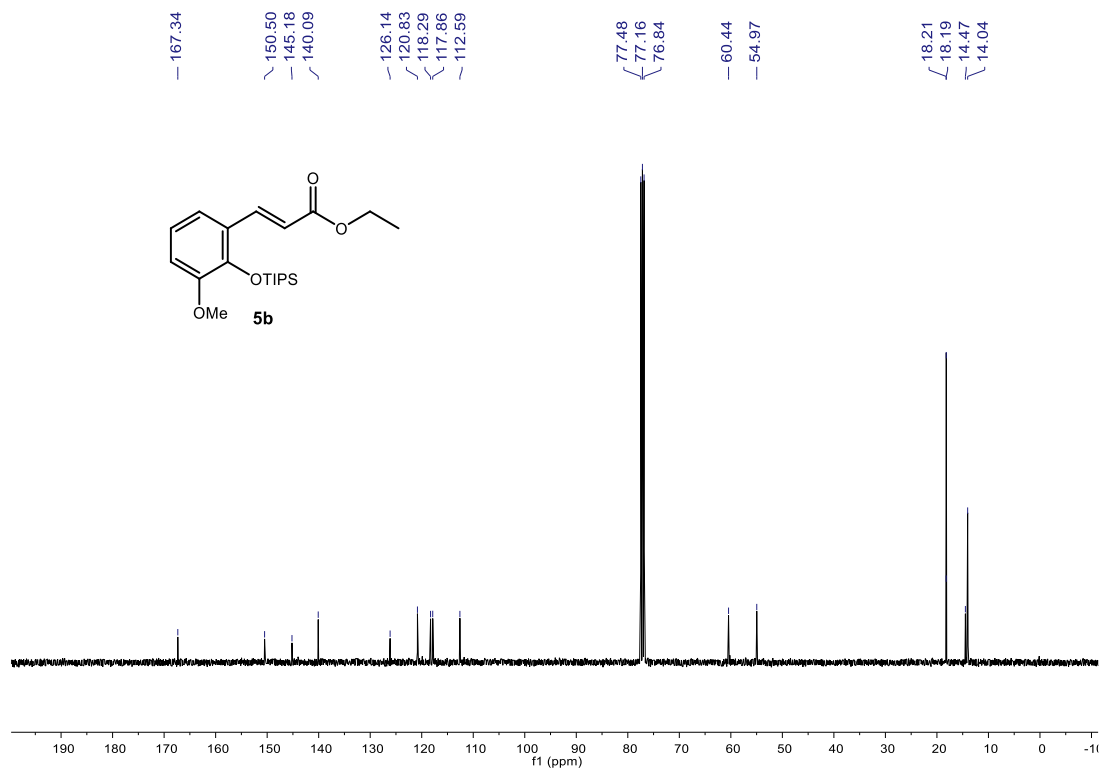

# HRMS of 5b

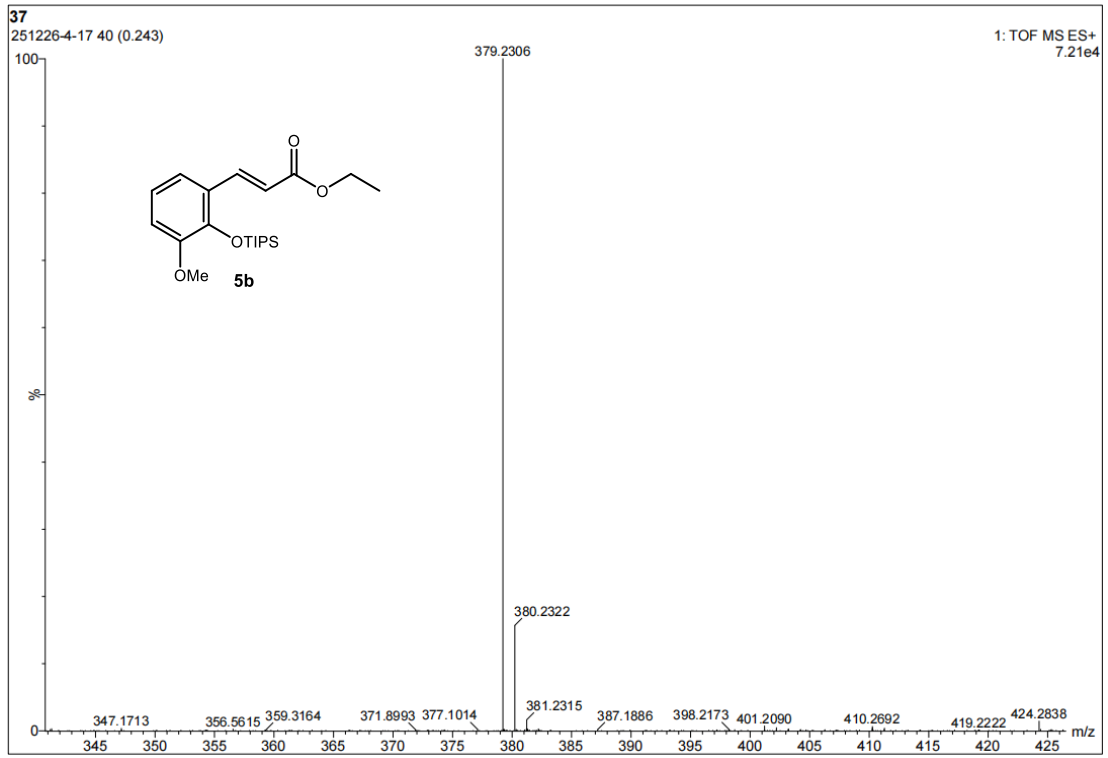

### <sup>1</sup>H NMR (400 MHz, CDCl<sub>3</sub>) Spectrum of 6b

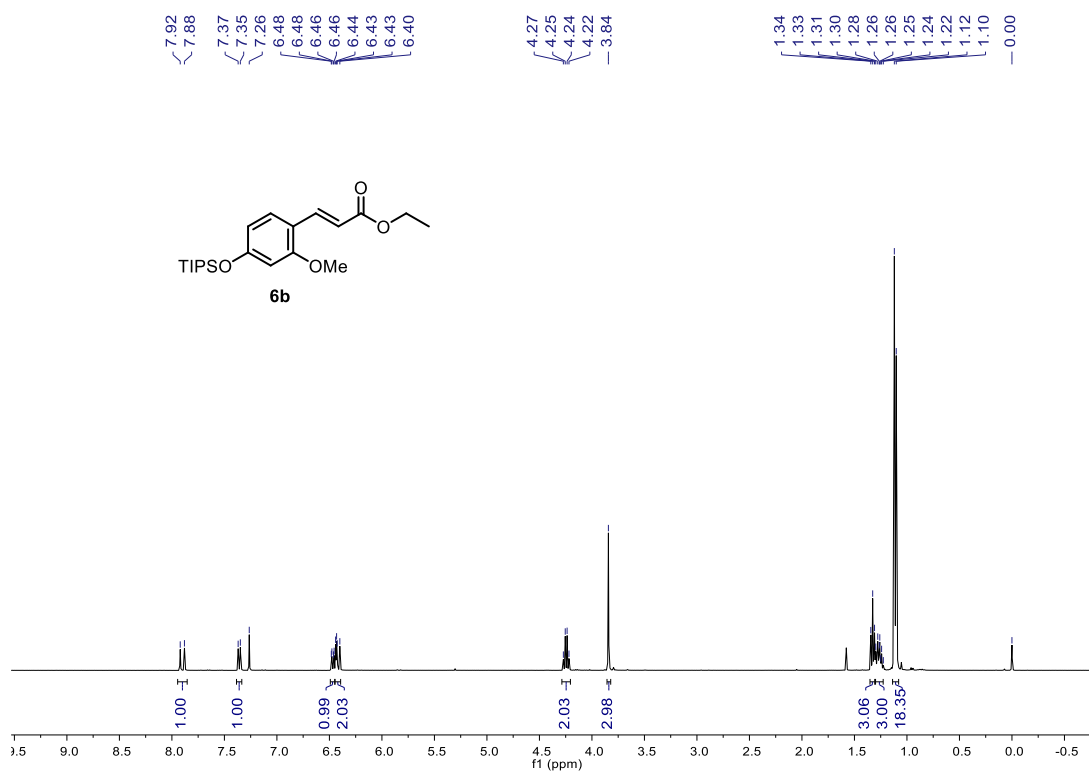

### <sup>13</sup>C NMR (101 MHz, CDCl<sub>3</sub>) Spectrum of 6b

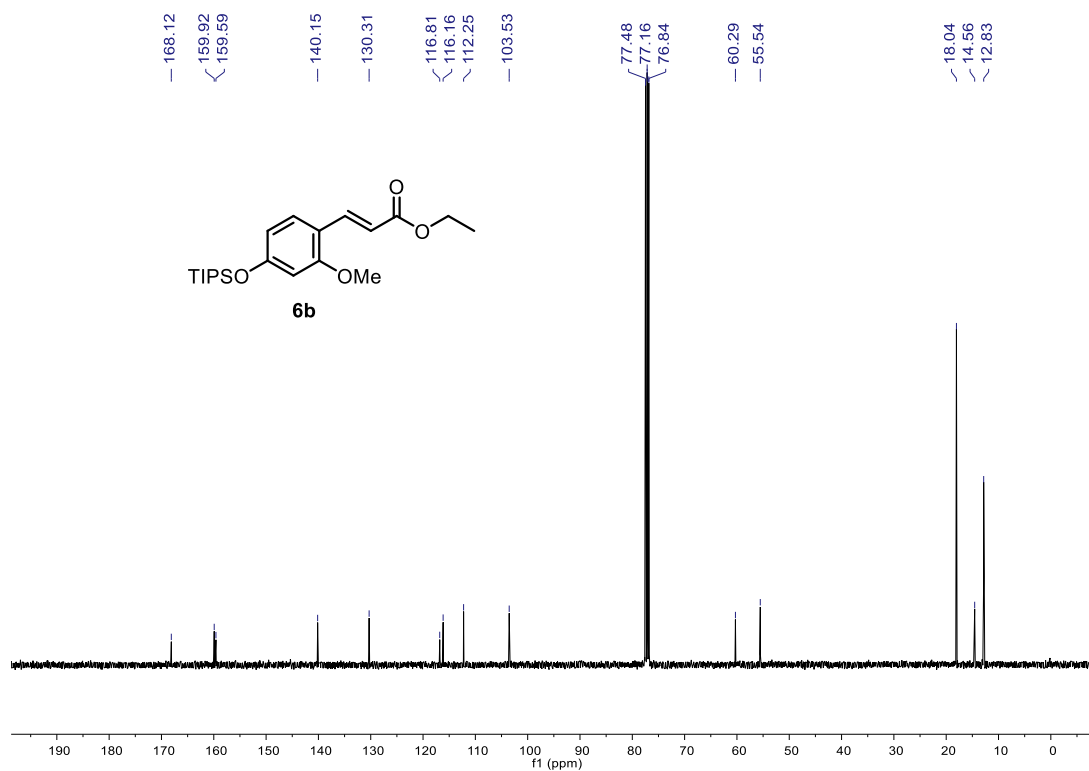

# HRMS of 6b

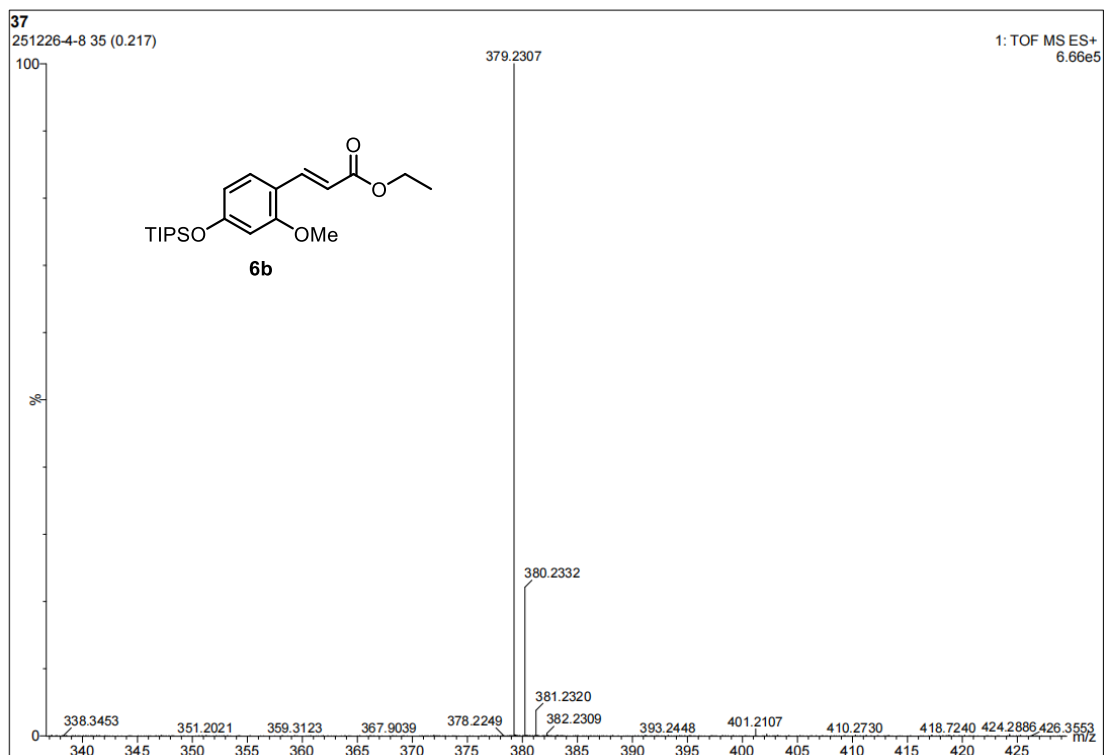

### <sup>1</sup>H NMR (400 MHz, CDCl<sub>3</sub>) Spectrum of 7b

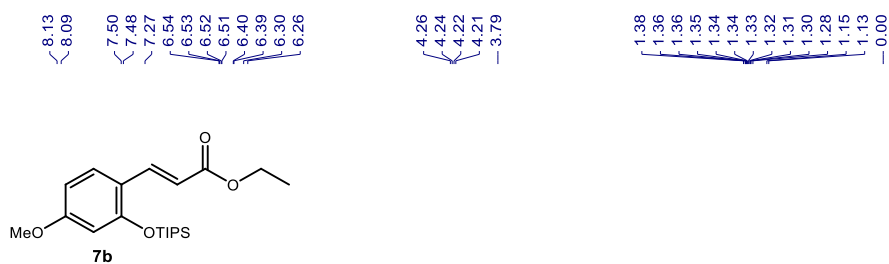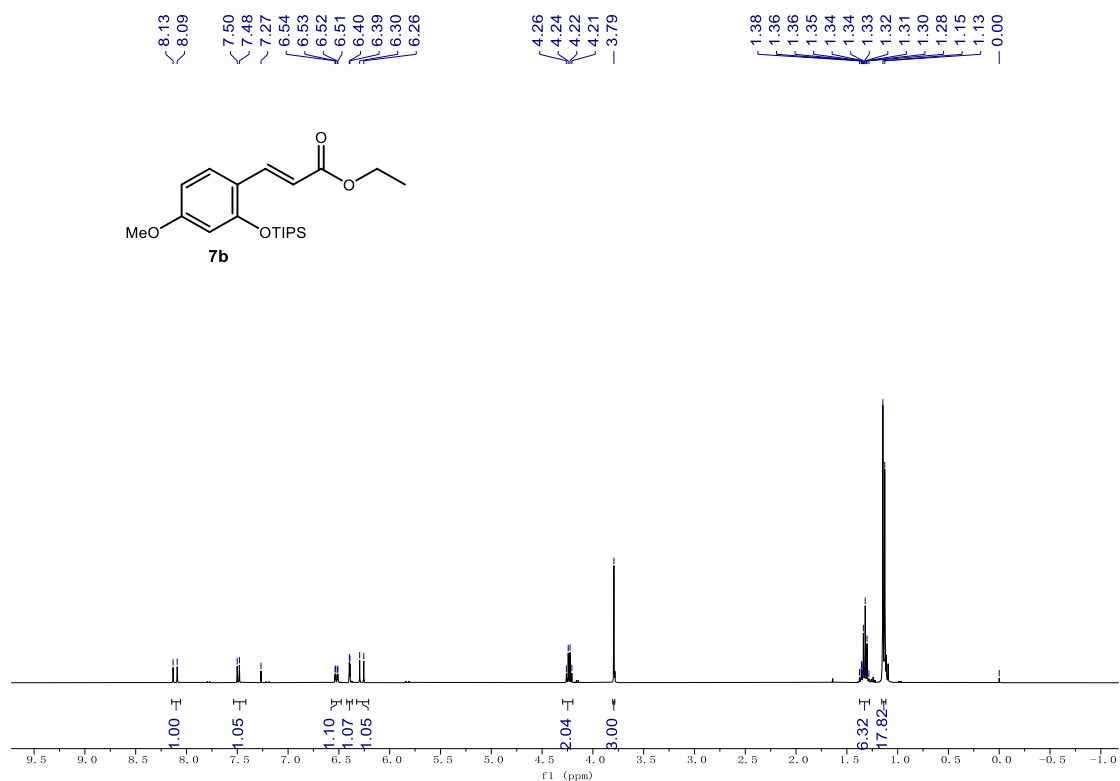

### <sup>13</sup>C NMR (101 MHz, CDCl<sub>3</sub>) Spectrum of 7b

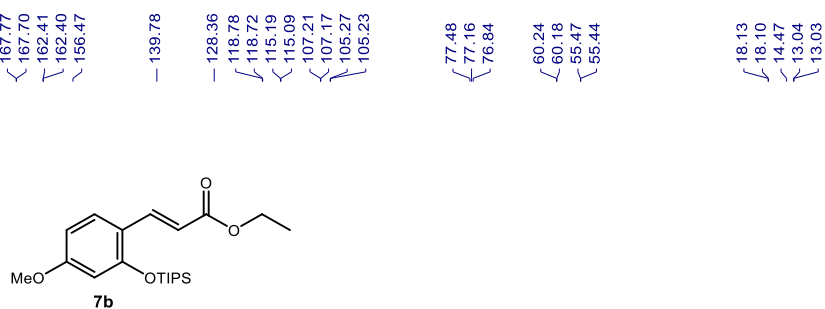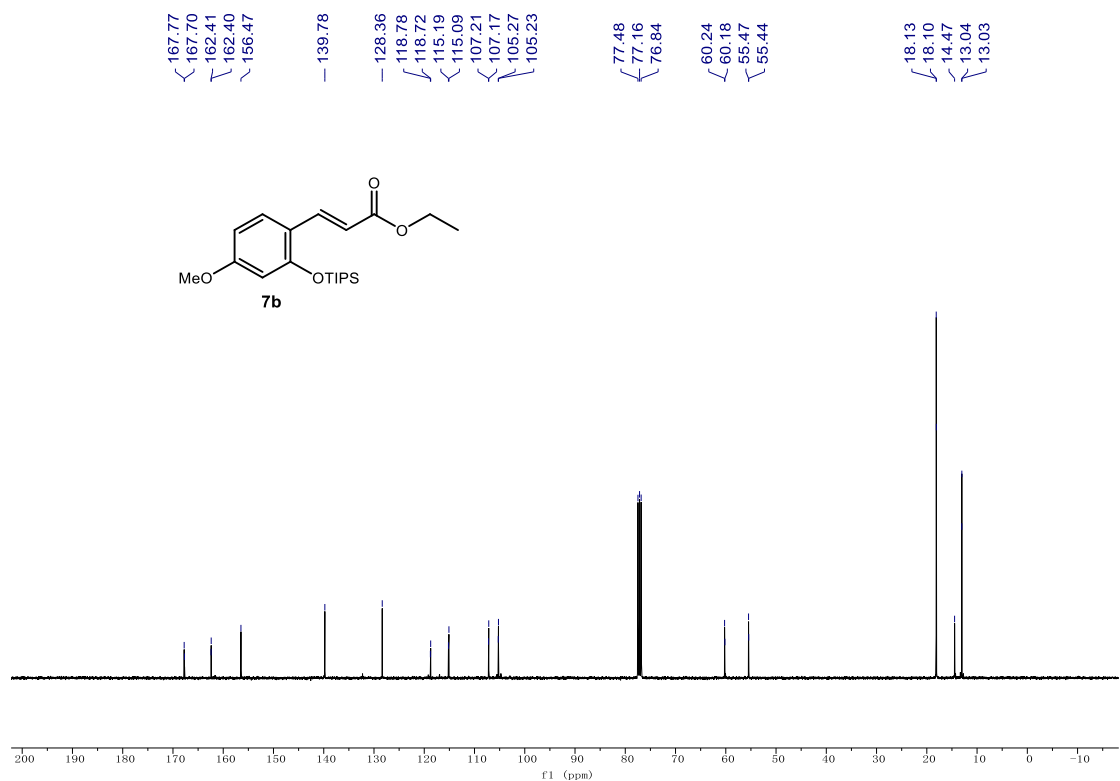

# HRMS of 7b

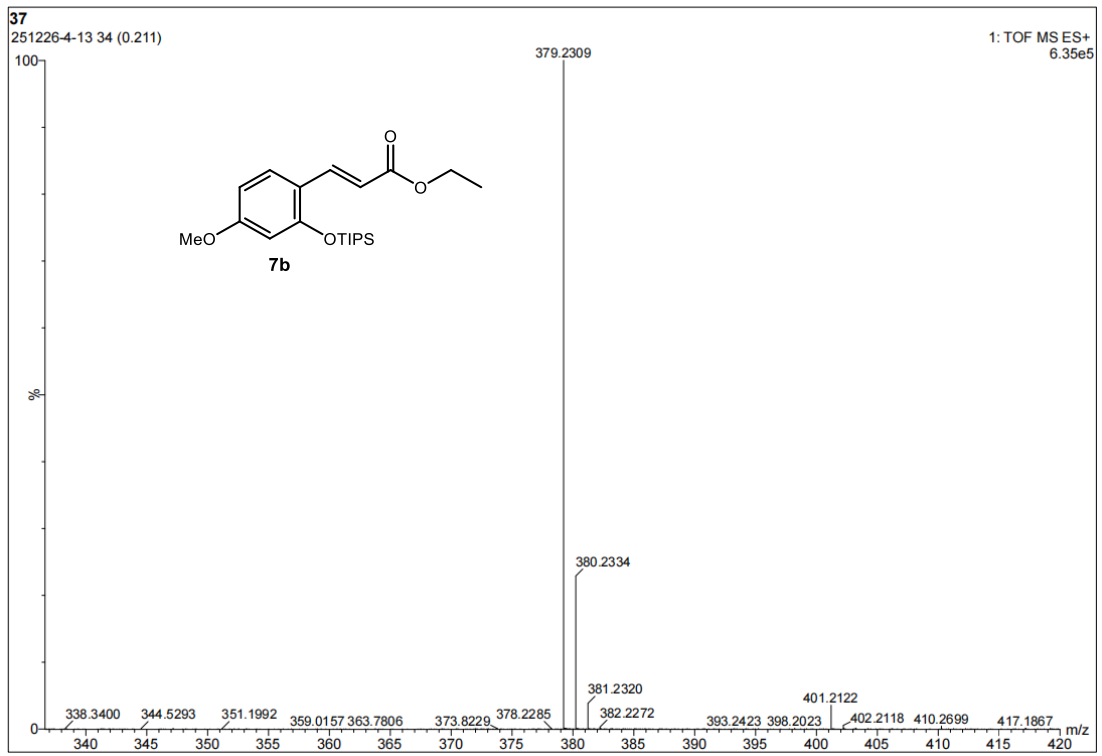

### <sup>1</sup>H NMR (400 MHz, CDCl<sub>3</sub>) Spectrum of 2c

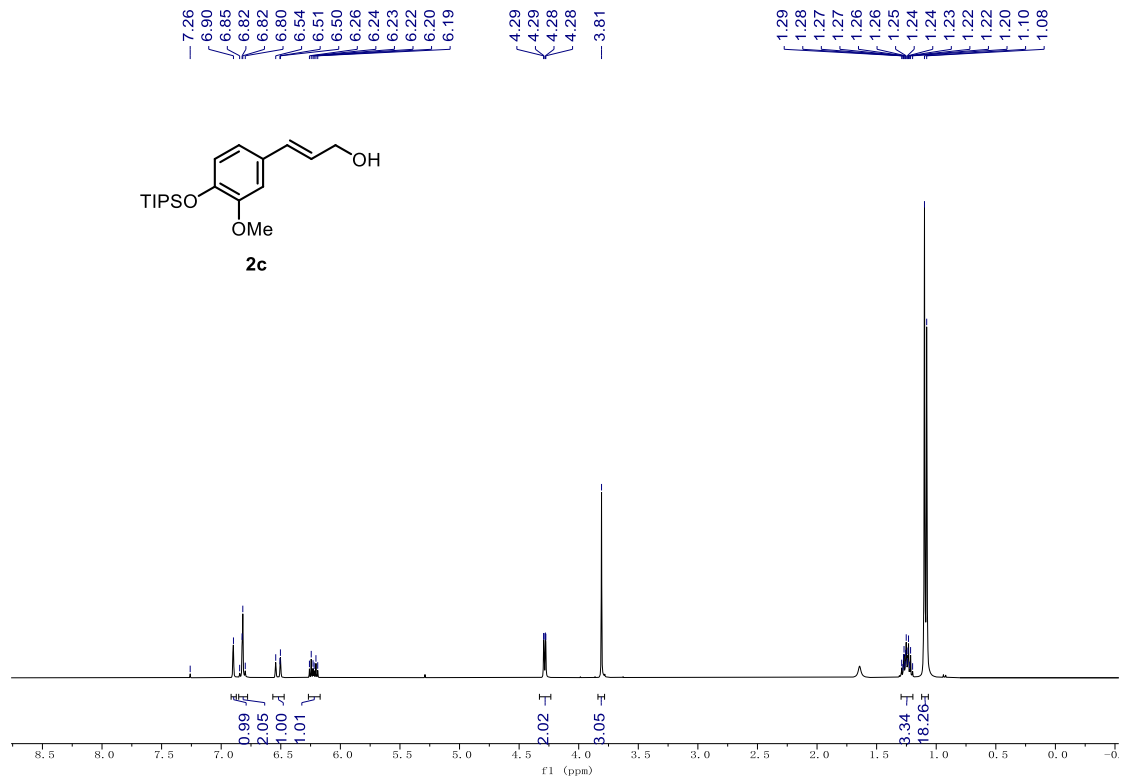

### <sup>13</sup>C NMR (101 MHz, CDCl<sub>3</sub>) Spectrum of 2c

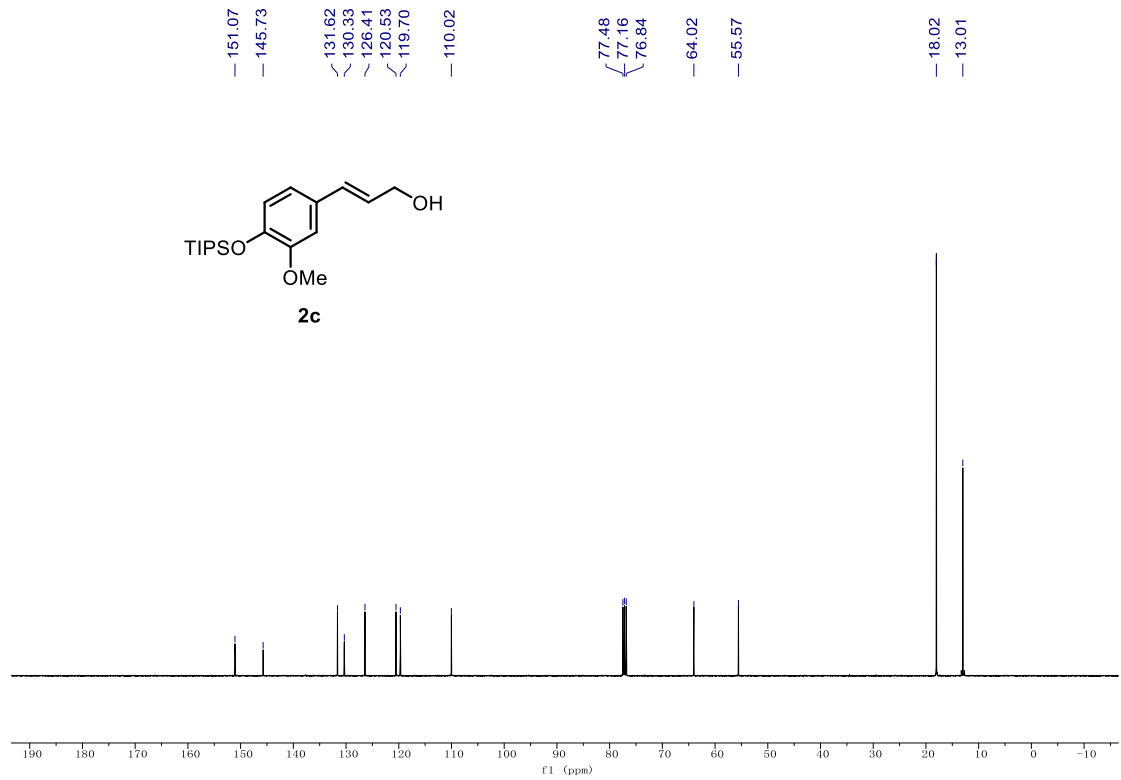

# HRMS of 2c

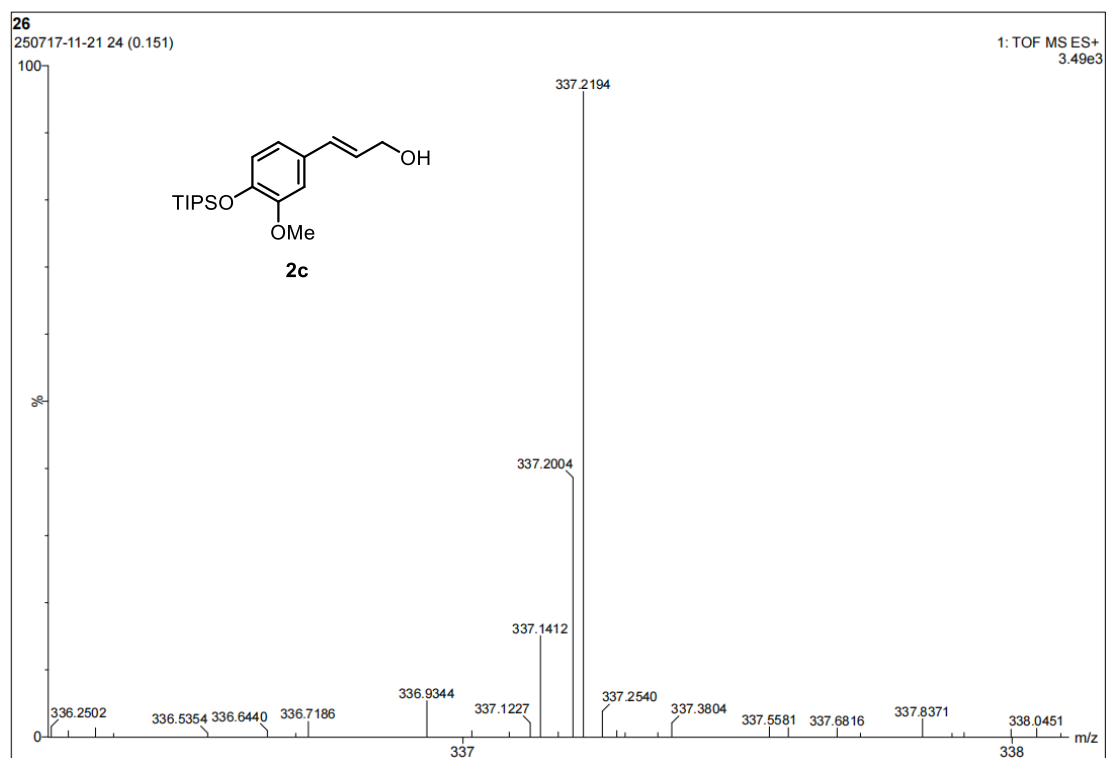

### <sup>1</sup>H NMR (400 MHz, CDCl<sub>3</sub>) Spectrum of 3c

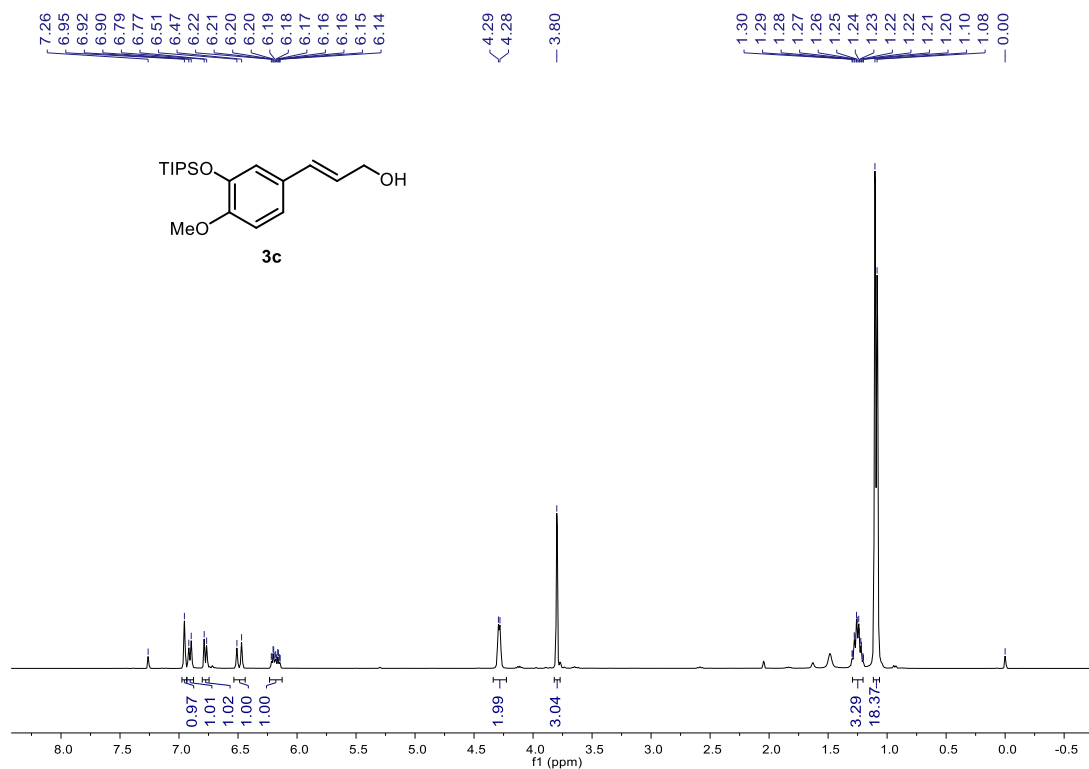

### <sup>13</sup>C NMR (101 MHz, CDCl<sub>3</sub>) Spectrum of 3c

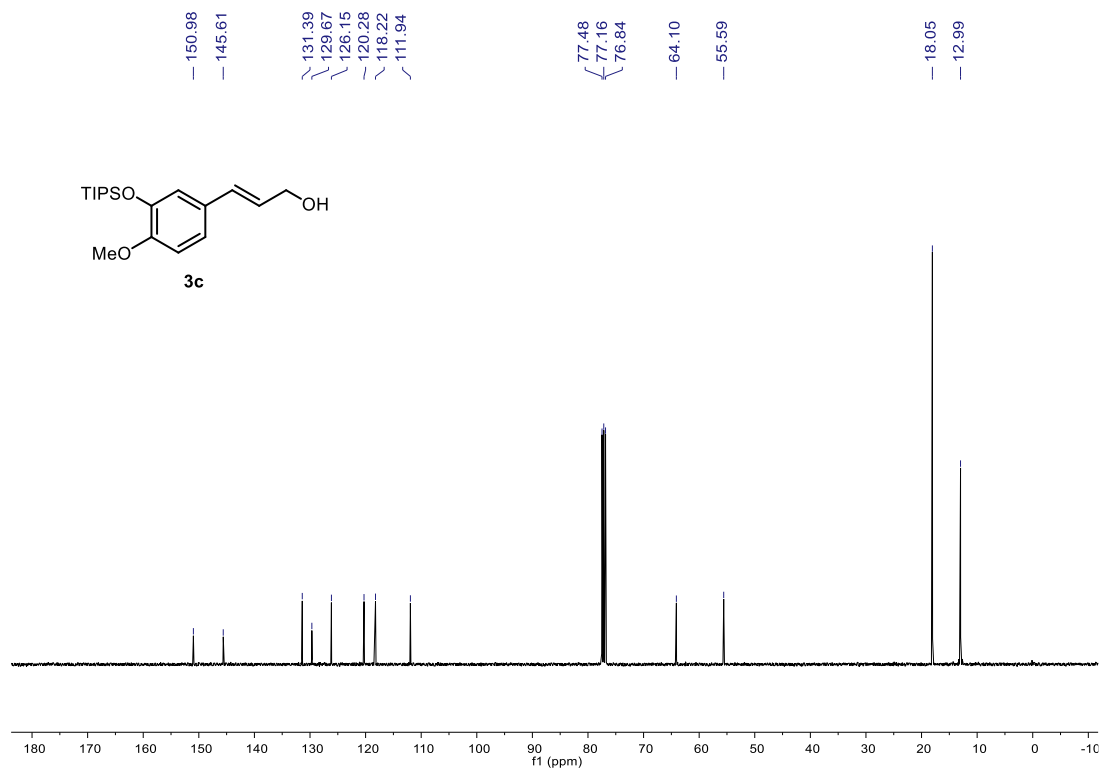

# HRMS of 3c

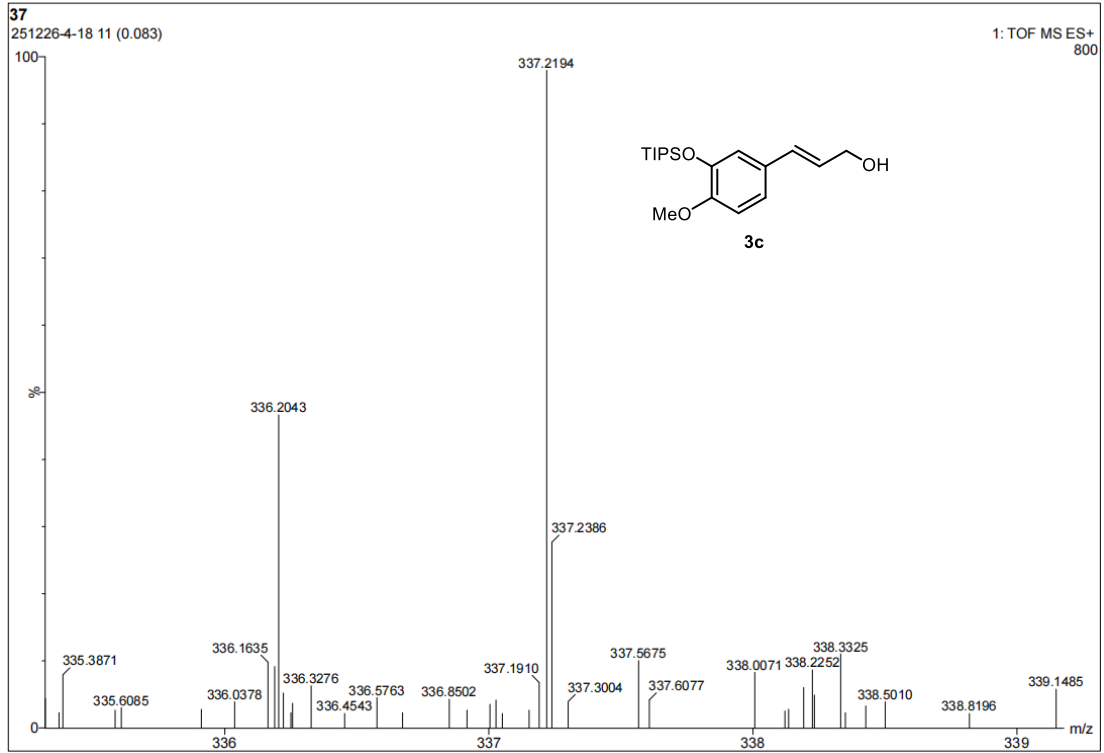

### <sup>1</sup>H NMR (400 MHz, CDCl<sub>3</sub>) Spectrum of 4c

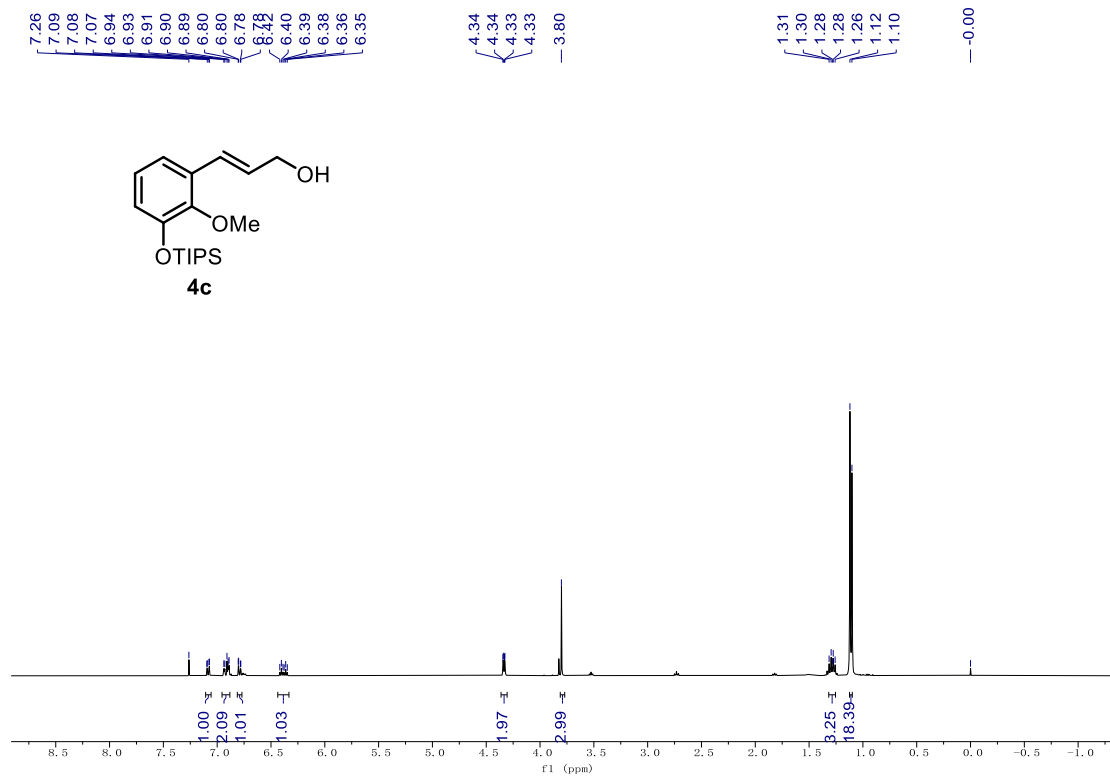

### <sup>13</sup>C NMR (101 MHz, CDCl<sub>3</sub>) Spectrum of 4c

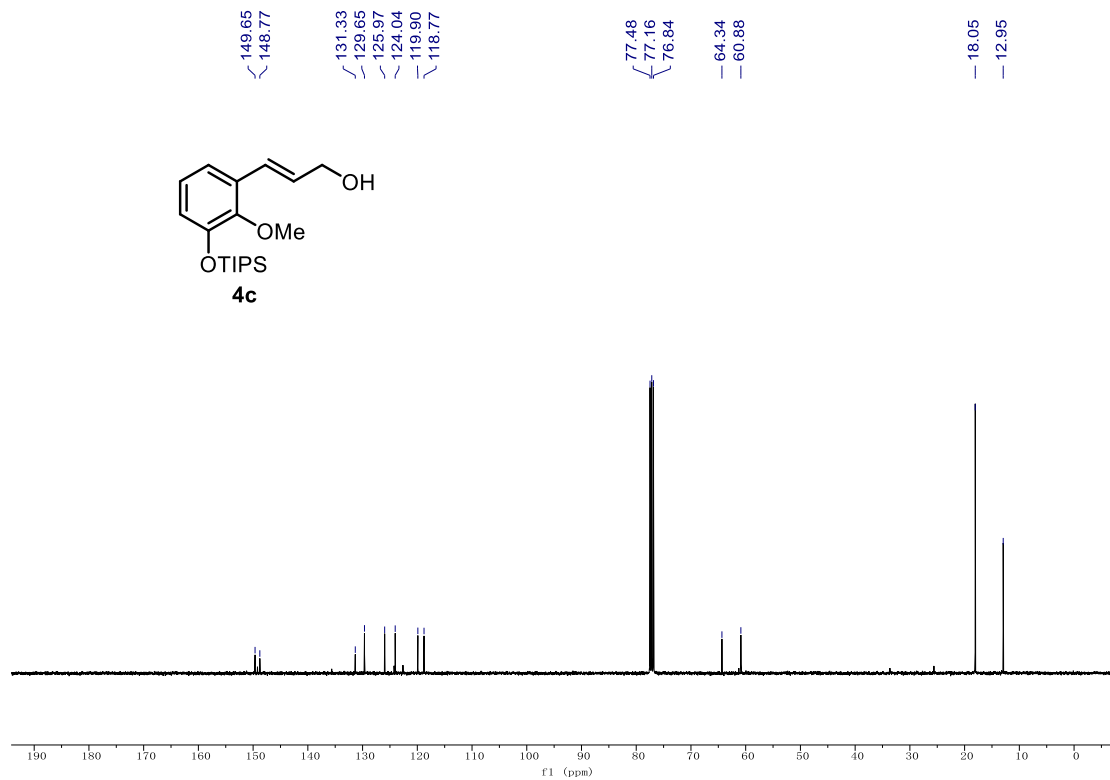

# HRMS of 4c

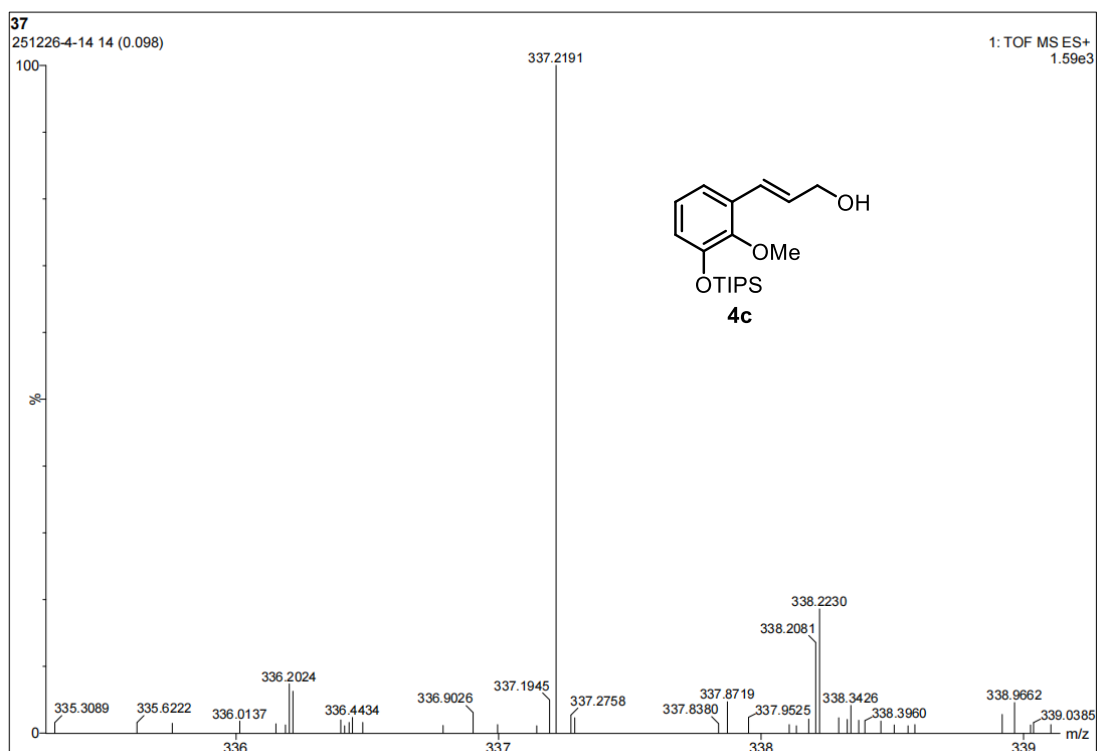

### <sup>1</sup>H NMR (400 MHz, CDCl<sub>3</sub>) Spectrum of 5c

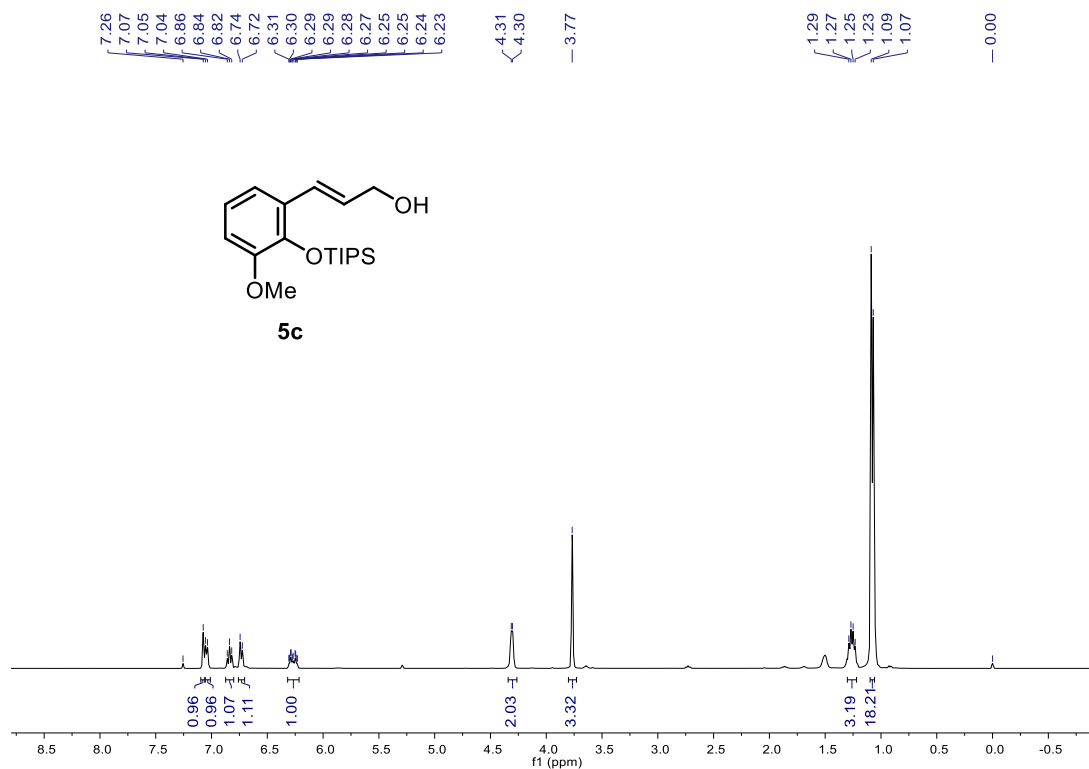

### <sup>13</sup>C NMR (101 MHz, CDCl<sub>3</sub>) Spectrum of 5c

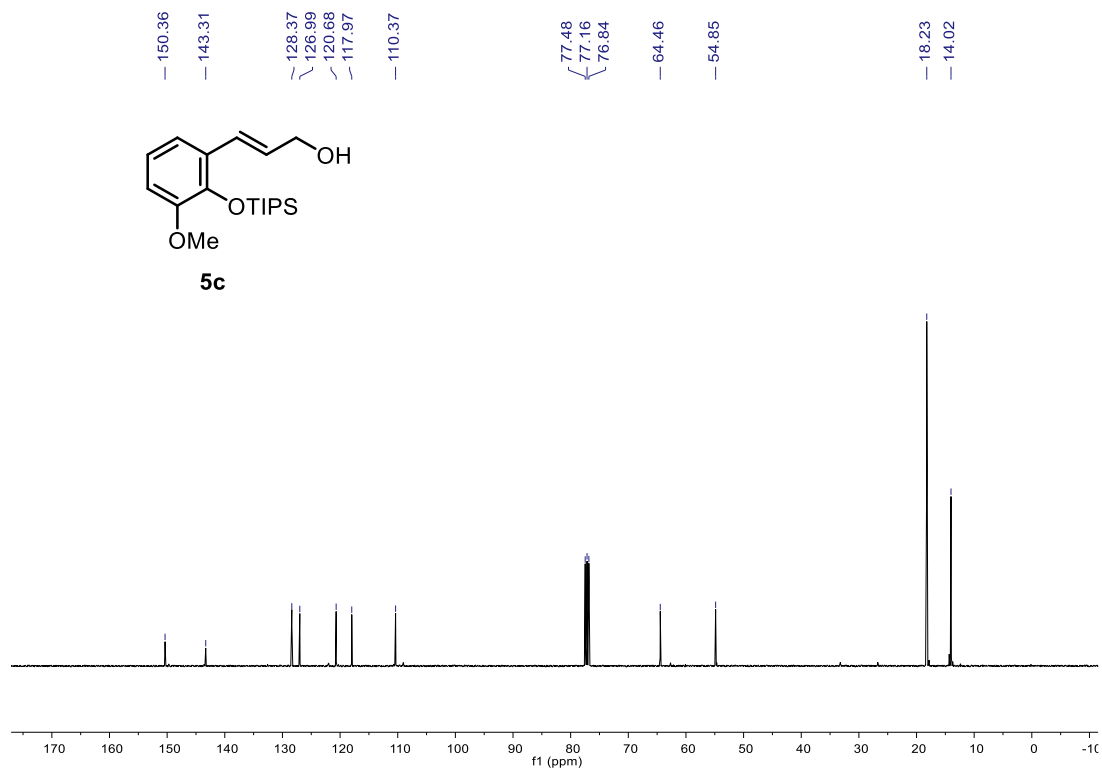

# HRMS of 5c

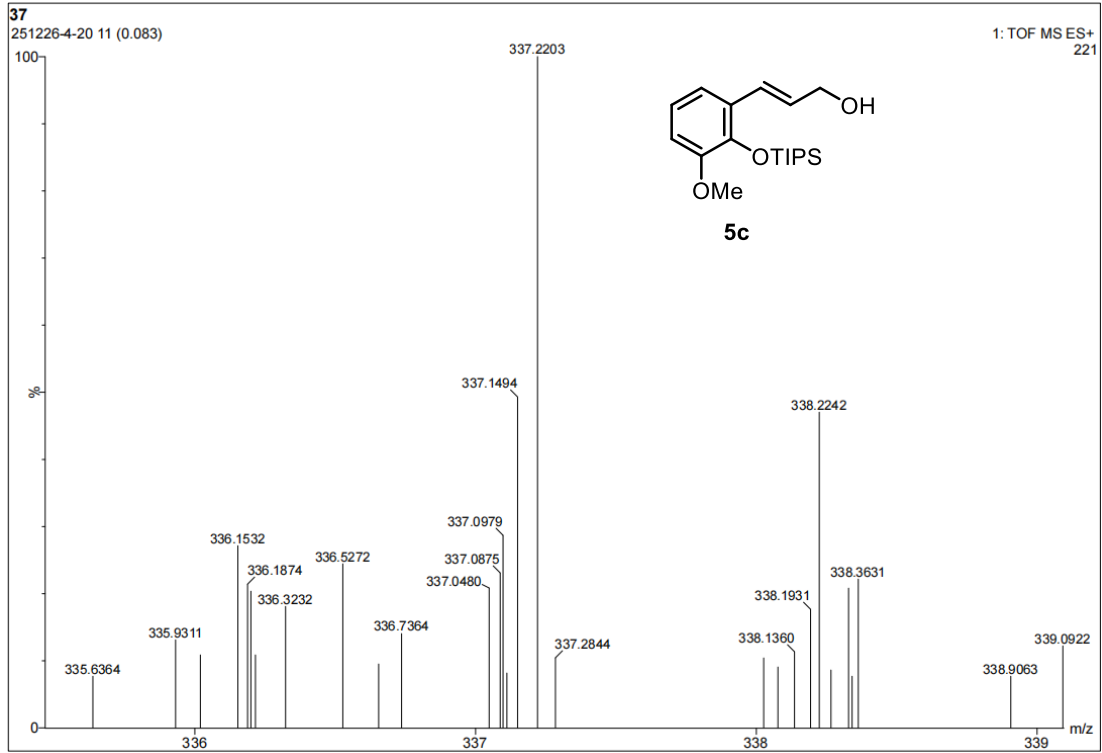

### <sup>1</sup>H NMR (400 MHz, CDCl<sub>3</sub>) Spectrum of 6c

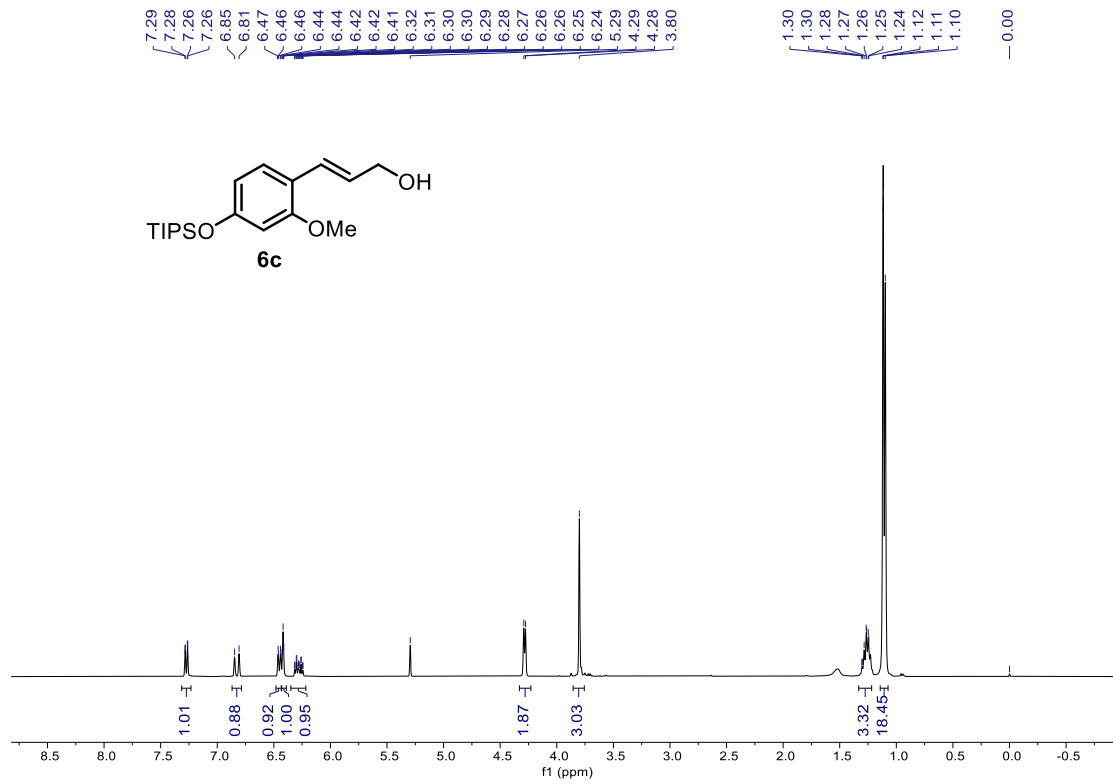

### <sup>13</sup>C NMR (101 MHz, CDCl<sub>3</sub>) Spectrum of 6c

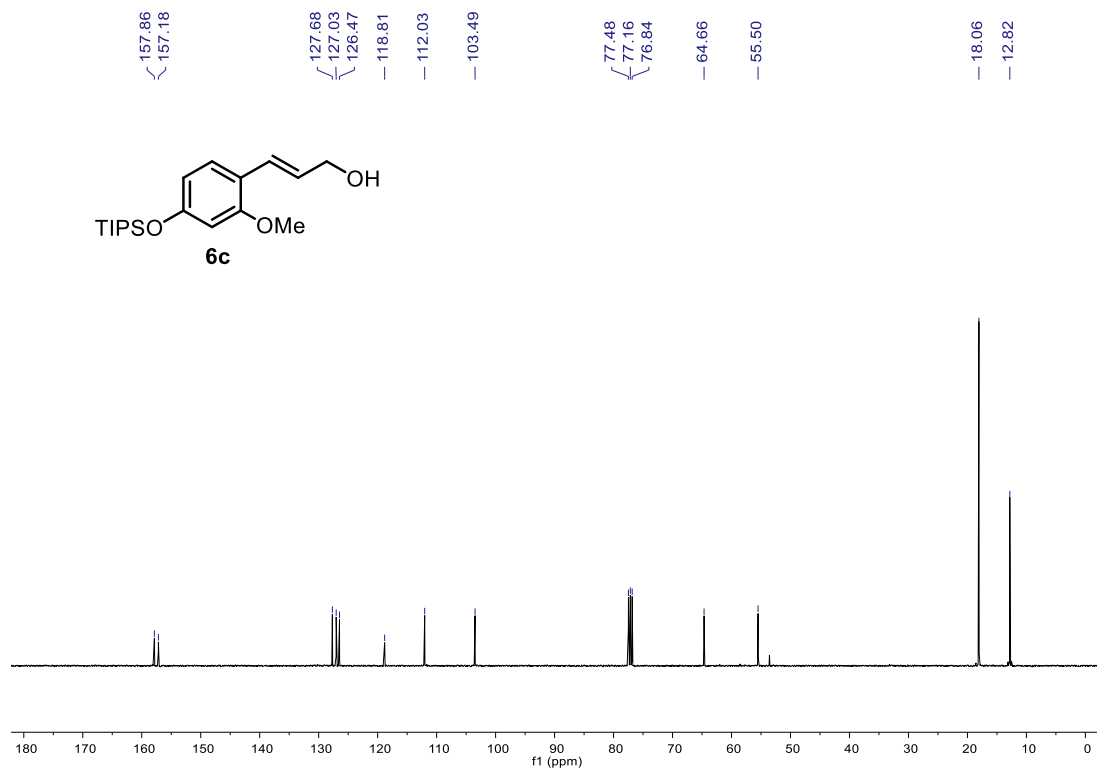

# HRMS of 6c

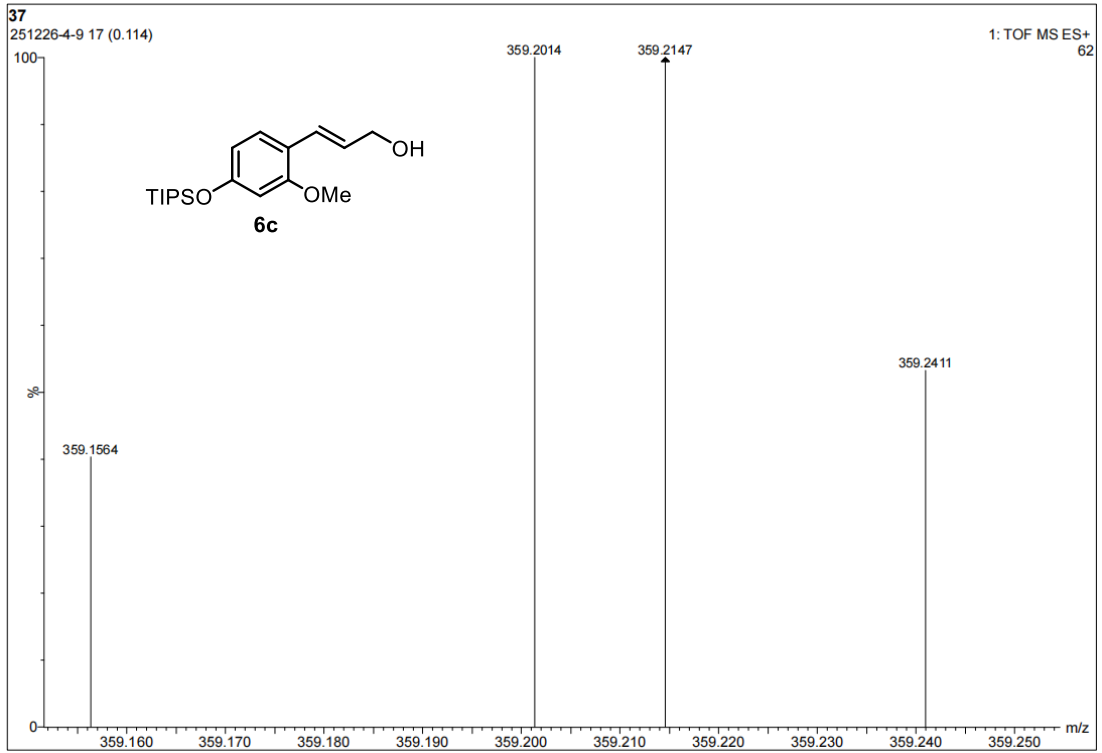

### <sup>1</sup>H NMR (400 MHz, CDCl<sub>3</sub>) Spectrum of 7c

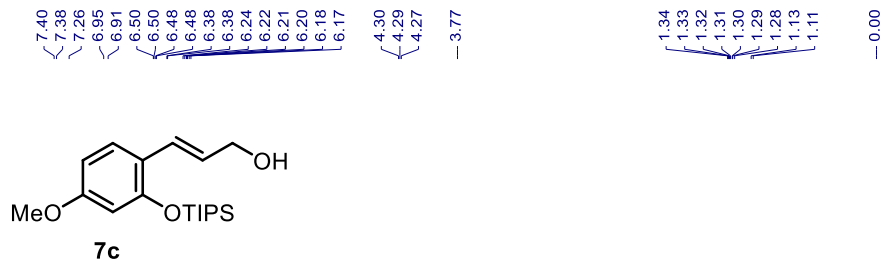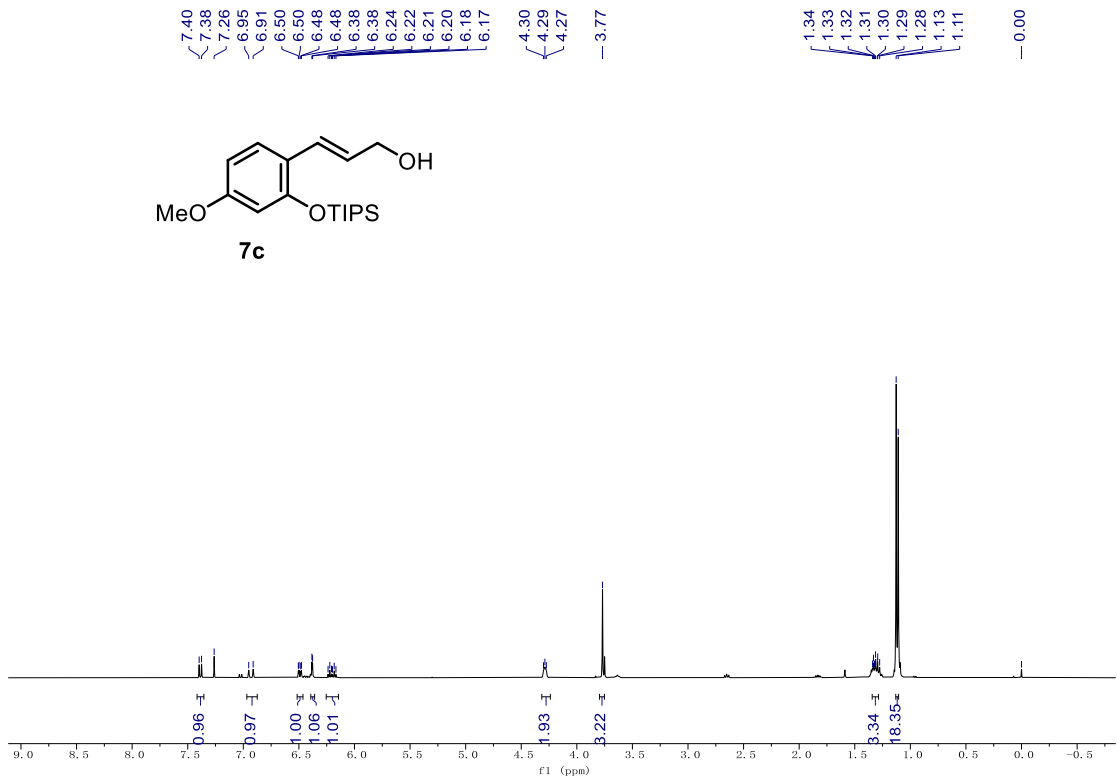

### <sup>13</sup>C NMR (101 MHz, CDCl<sub>3</sub>) Spectrum of 7c

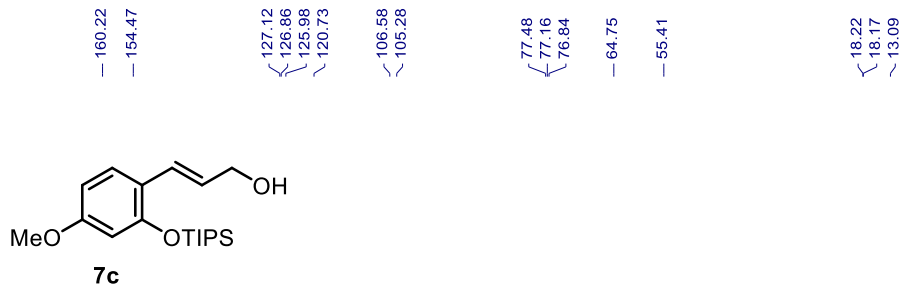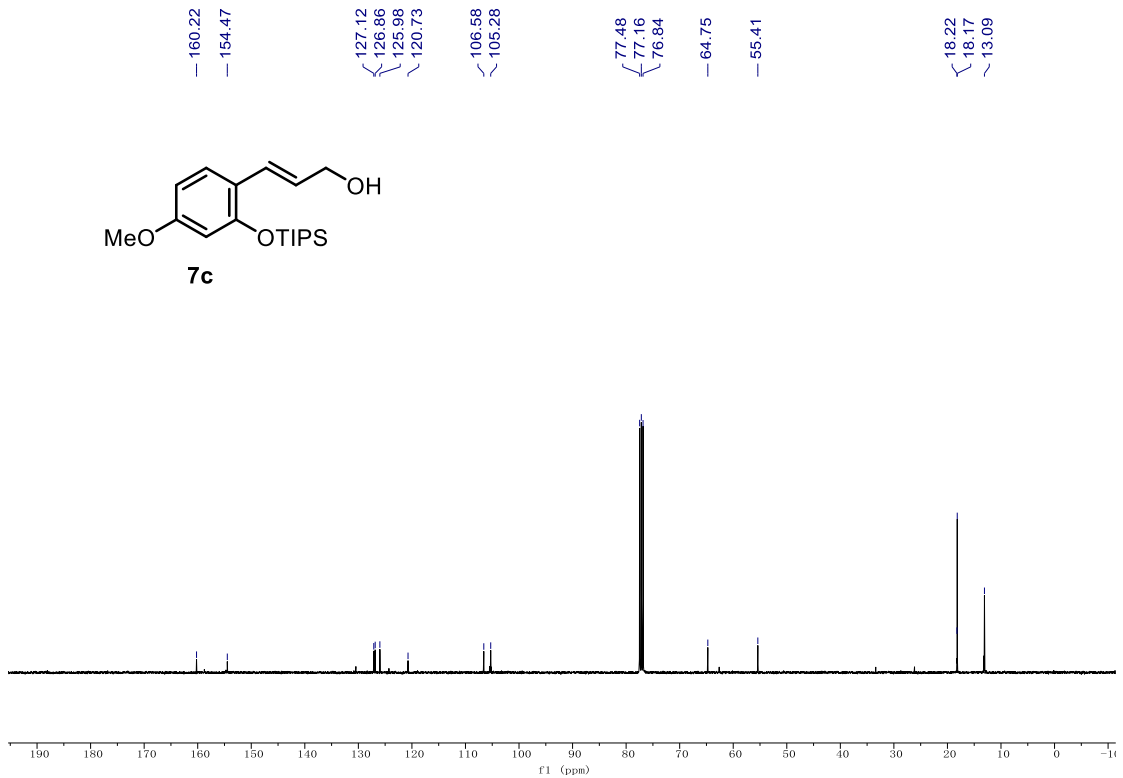

# HRMS of 7c

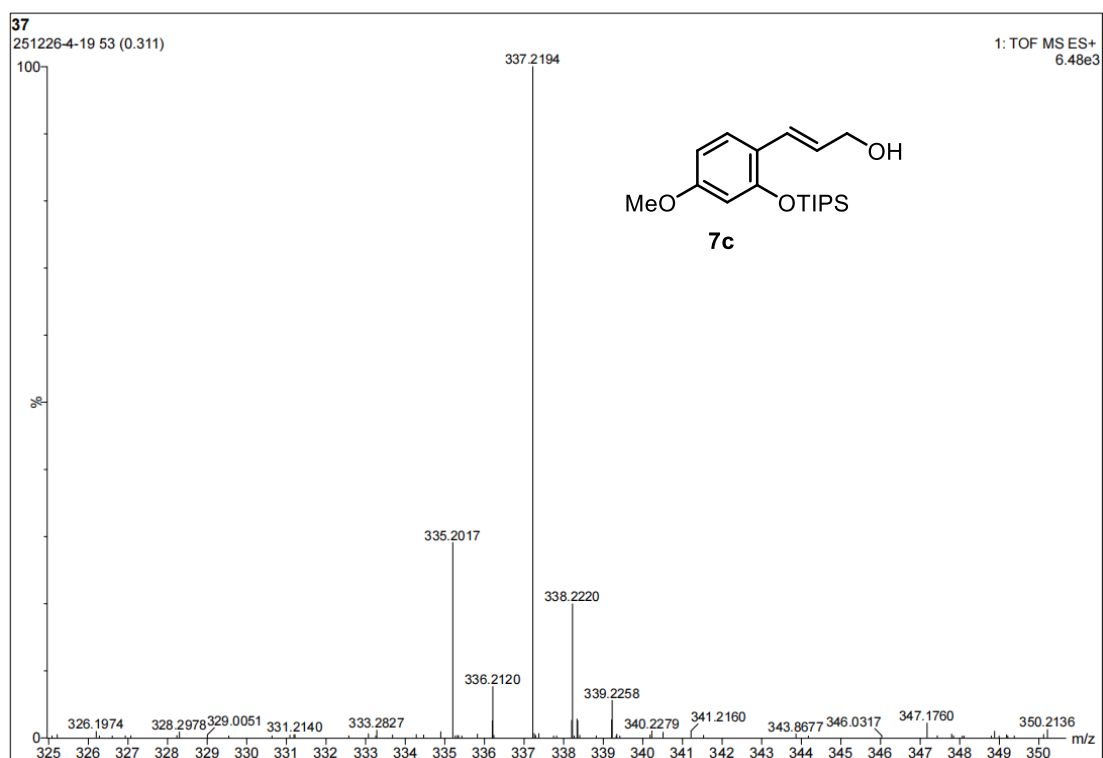

### <sup>1</sup>H NMR (400 MHz, DMSO-*d*<sub>6</sub>) Spectrum of 2f

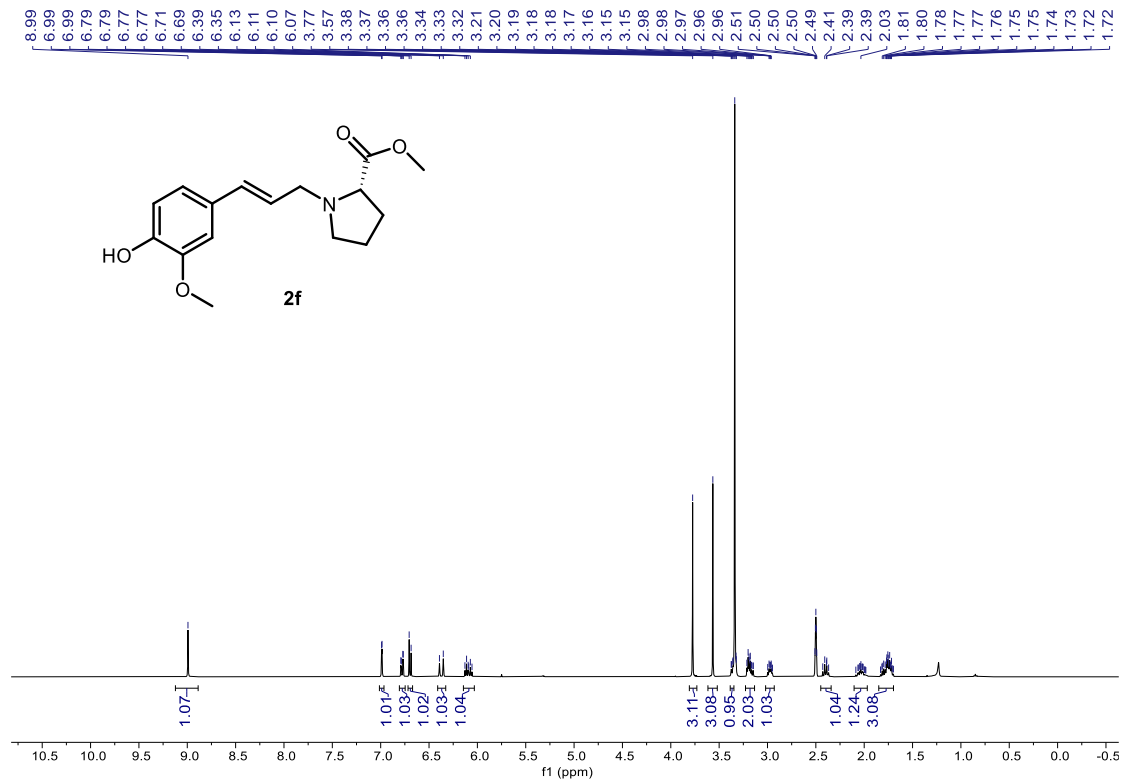

### <sup>13</sup>C NMR (101 MHz, DMSO-*d*<sub>6</sub>) Spectrum of 2f

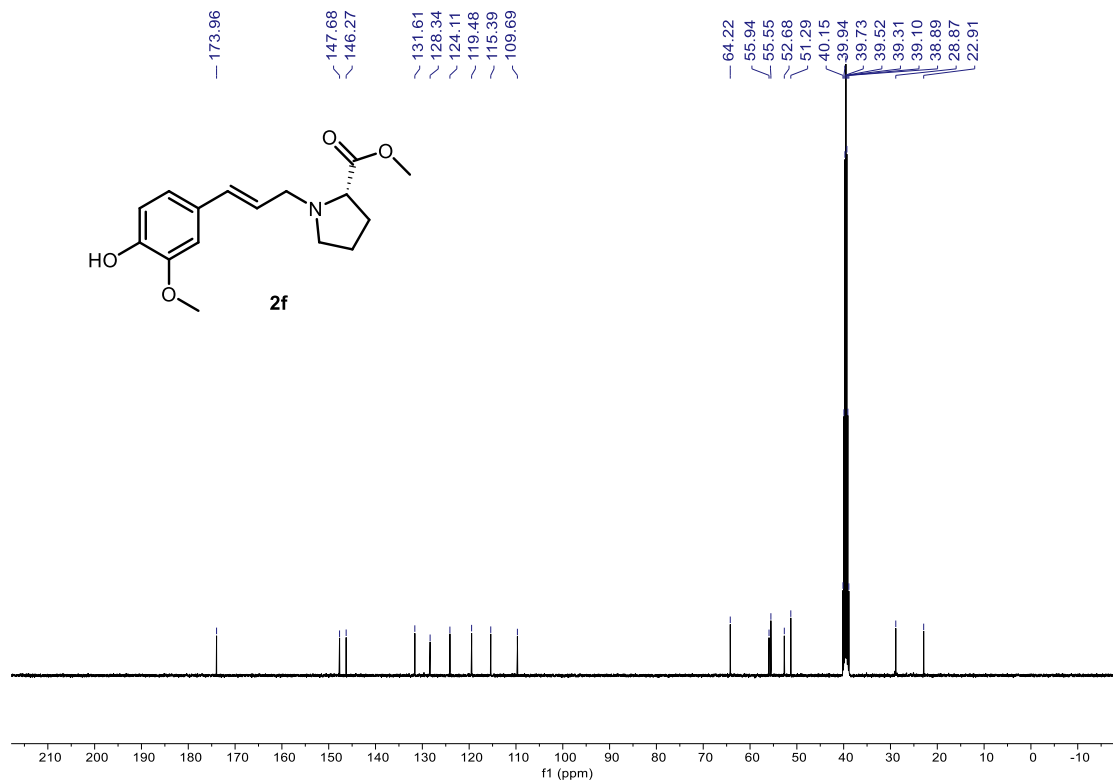

### DEPT135 (400 MHz, DMSO-*d*<sub>6</sub>) Spectrum of 2f

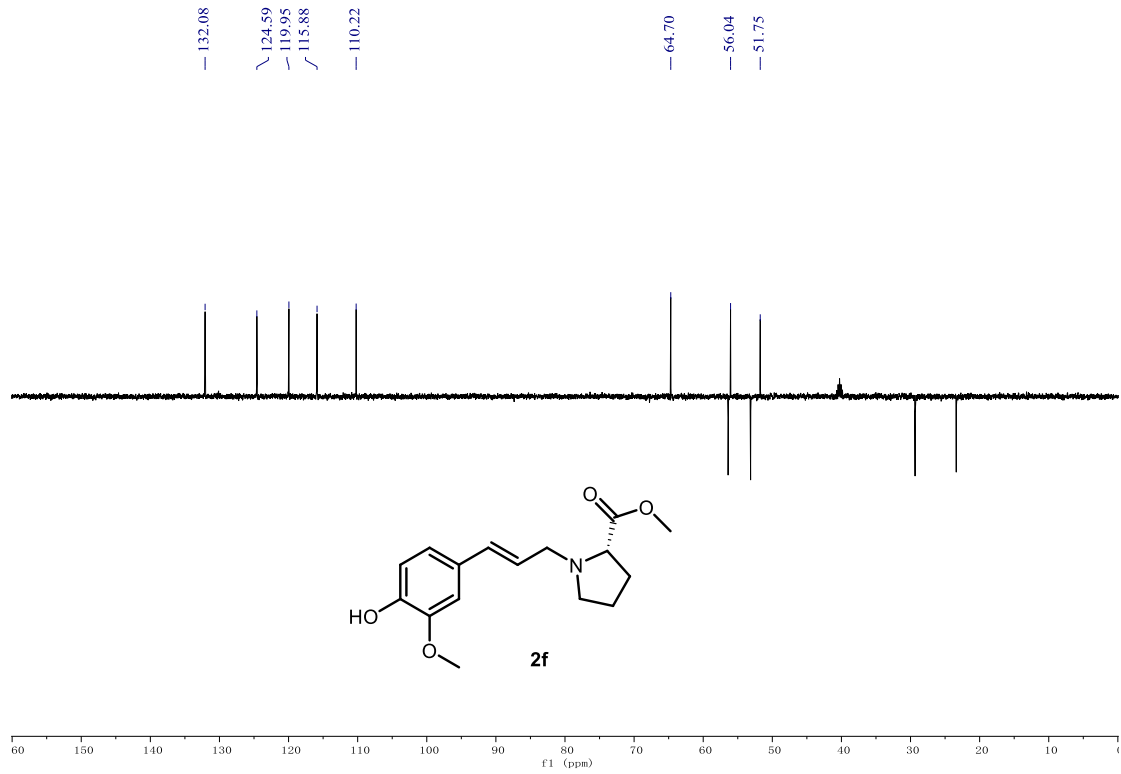

### <sup>1</sup>H-<sup>1</sup>H COSY (400 MHz, DMSO-*d*<sub>6</sub>) Spectrum of 2f

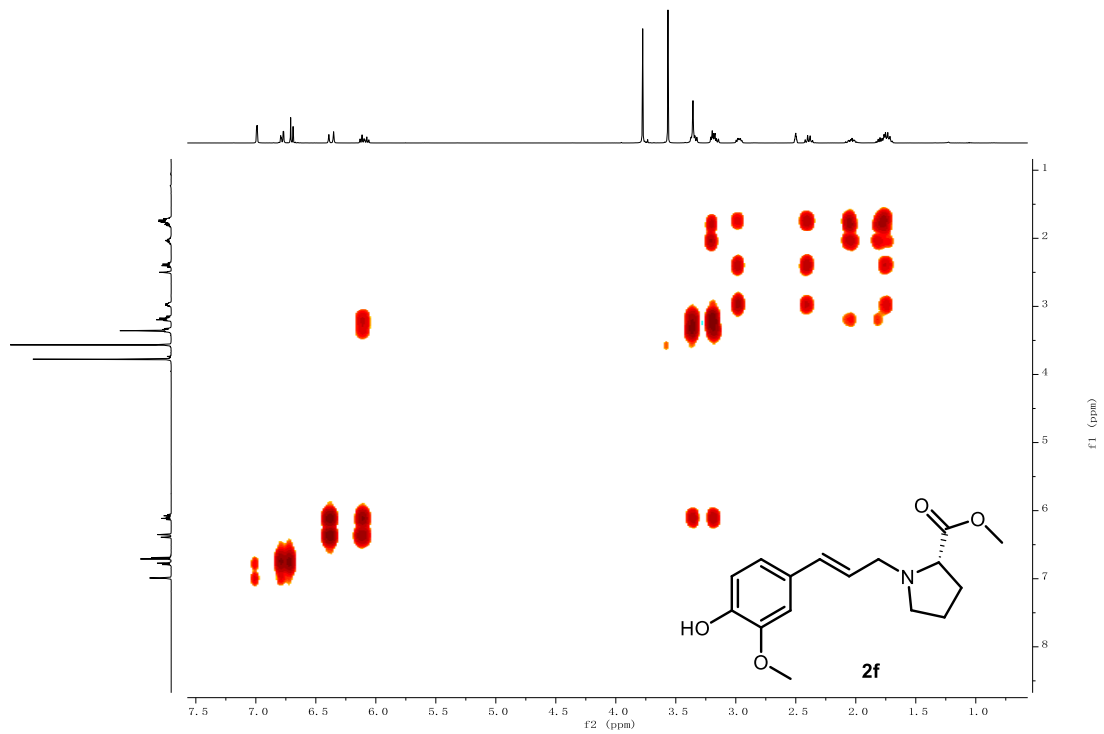

### HSQC (400 MHz, DMSO-*d*<sub>6</sub>) Spectrum of 2f

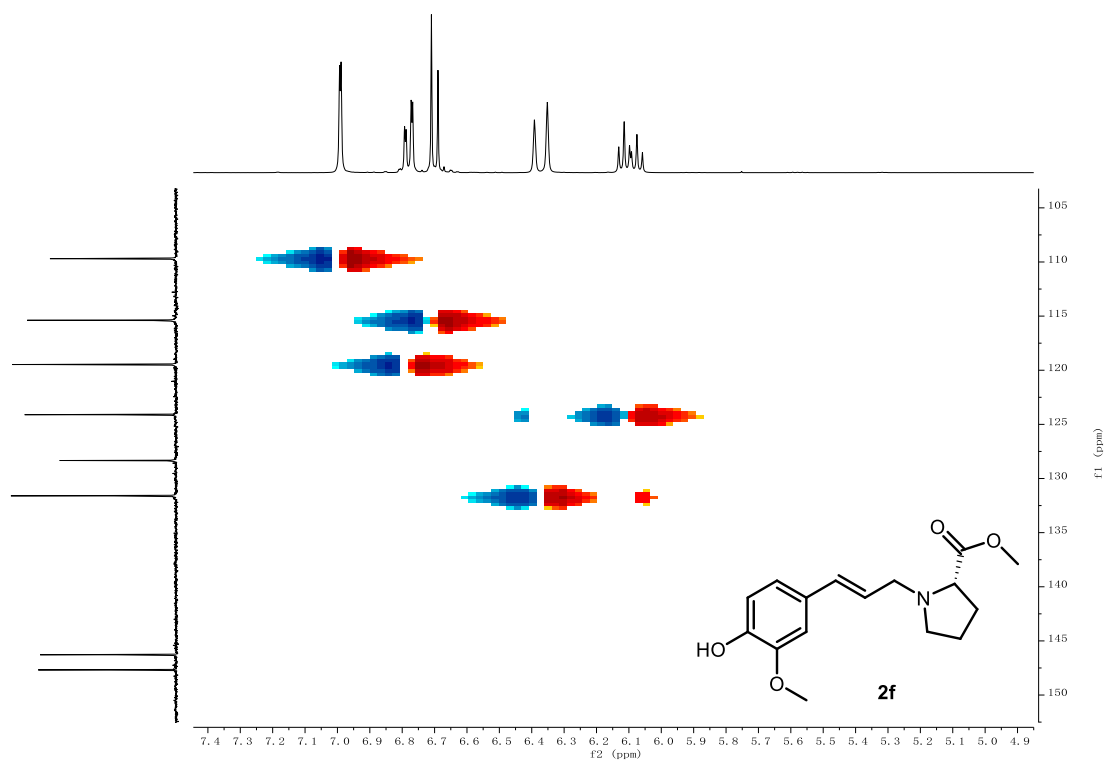

### HMBC (400 MHz, DMSO-*d*<sub>6</sub>) Spectrum of 2f

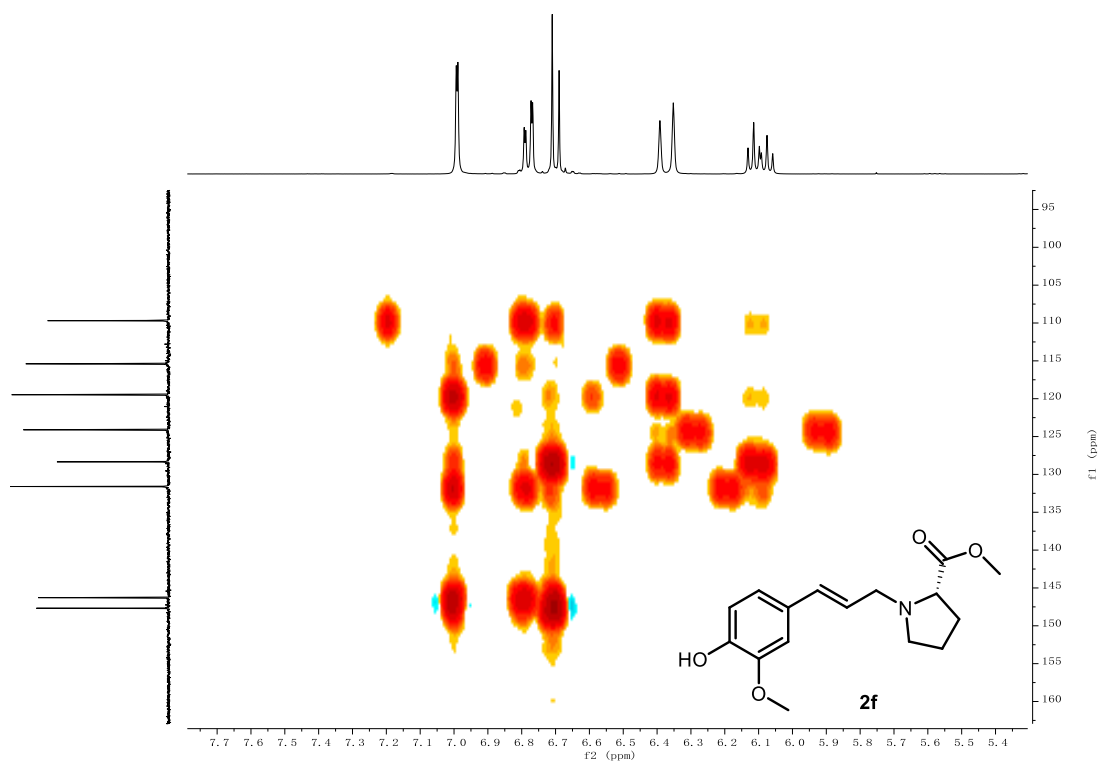

# HRMS of 2f

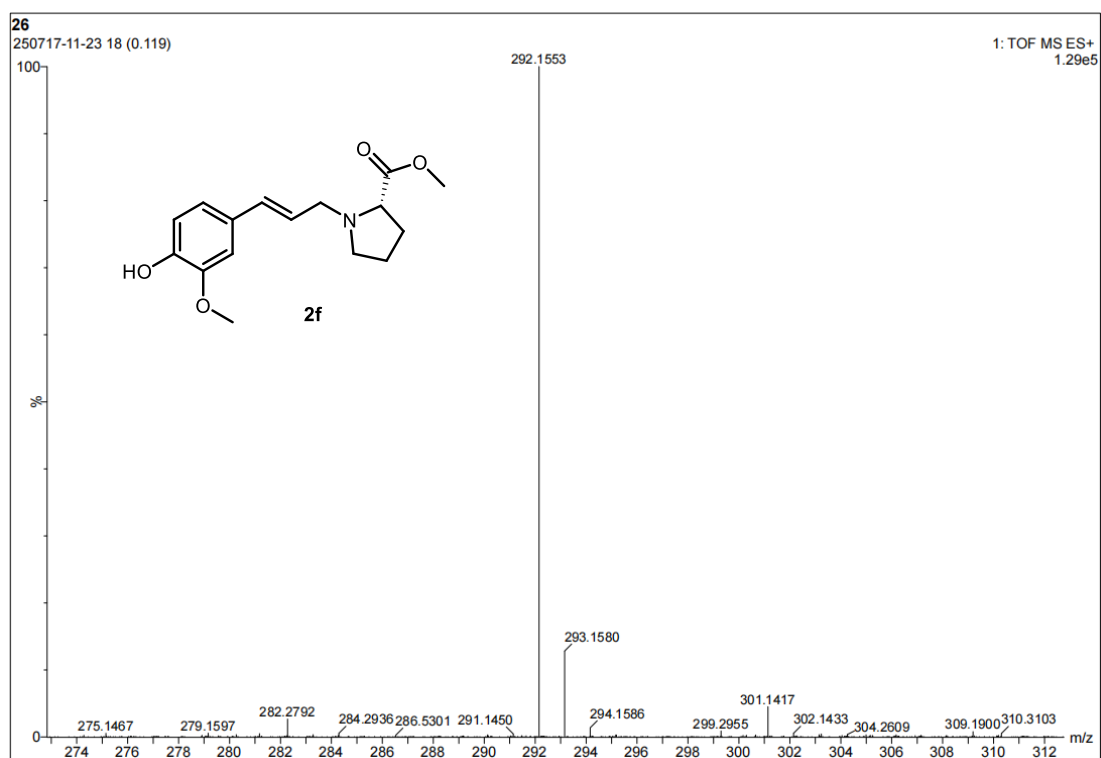

### <sup>1</sup>H NMR (400 MHz, DMSO-d<sub>6</sub>) Spectrum of 3f

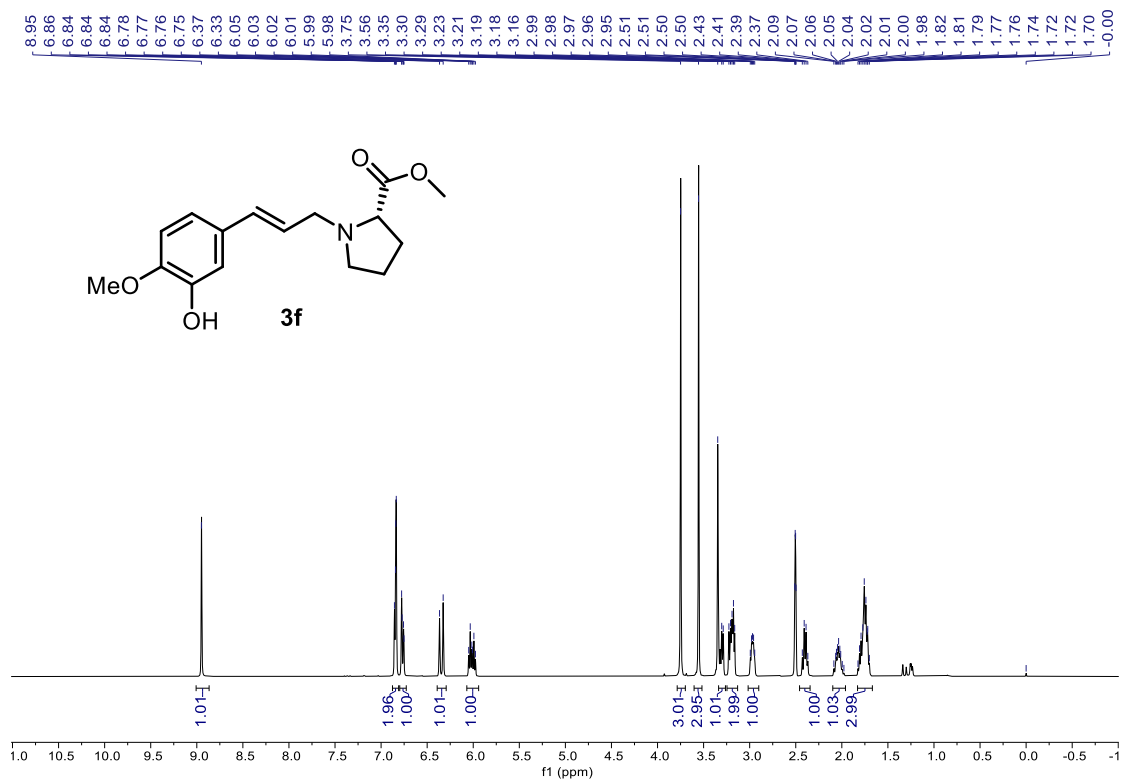

### <sup>13</sup>C NMR (101 MHz, DMSO-d<sub>6</sub>) Spectrum of 3f

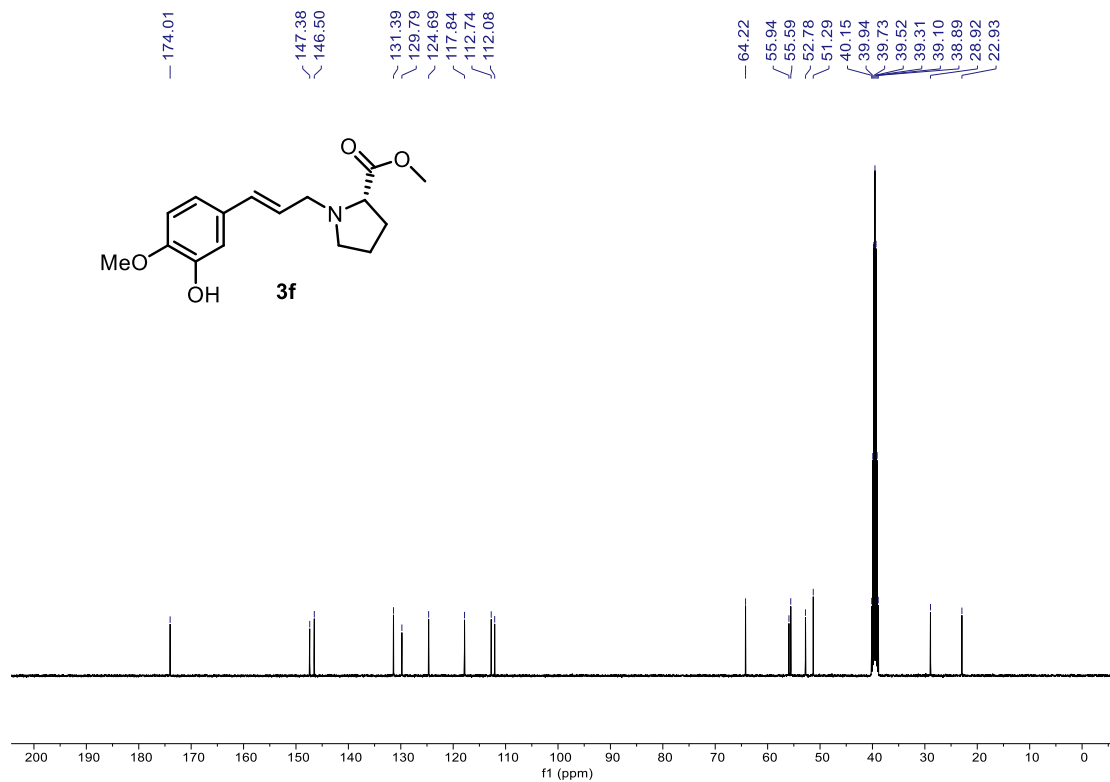

# HRMS of 3f

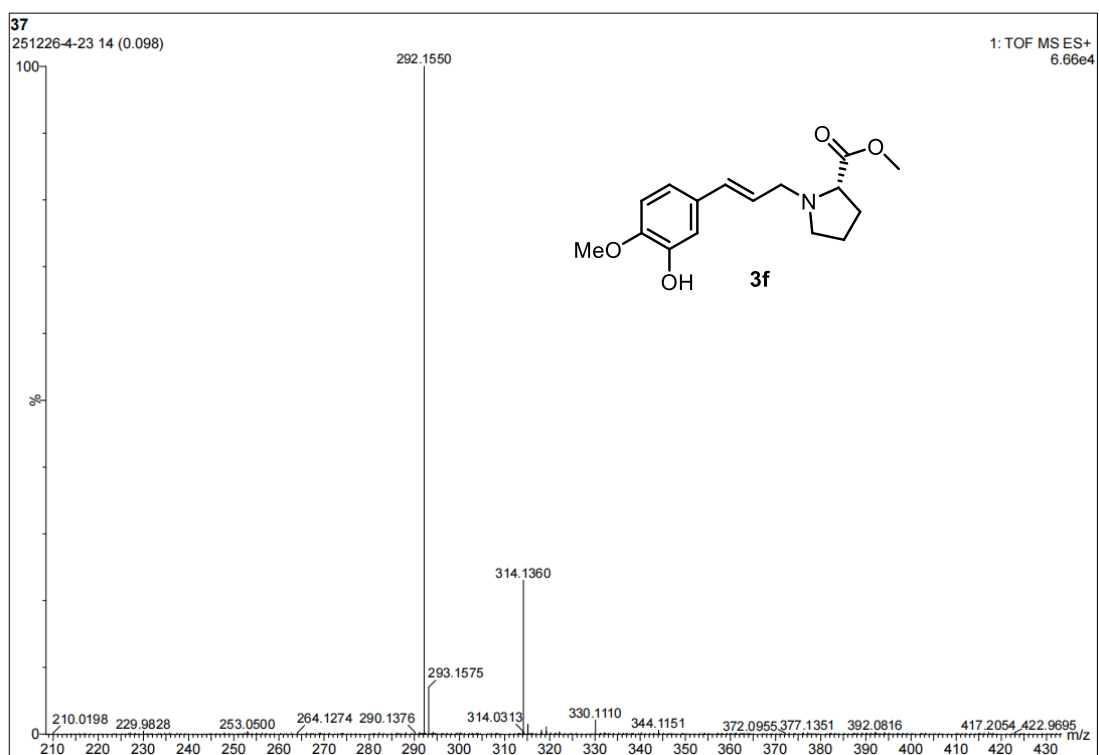

### <sup>1</sup>H NMR (400 MHz, DMSO-*d*<sub>6</sub>) Spectrum of 4f

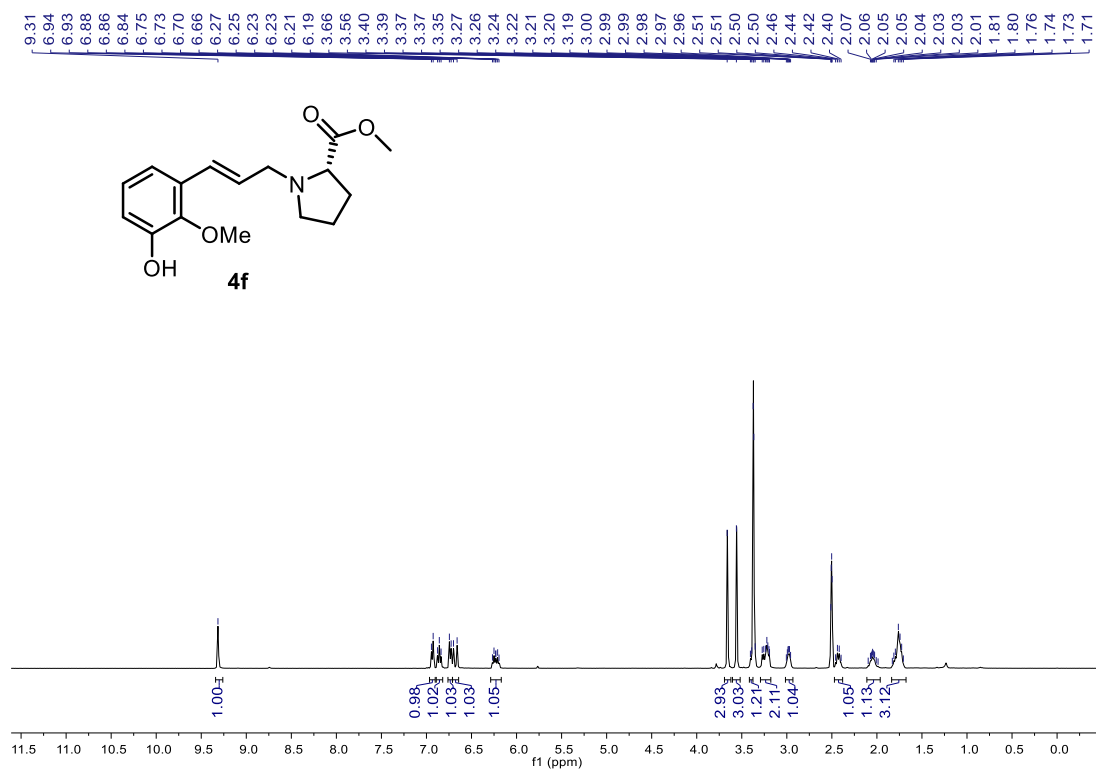

### <sup>13</sup>C NMR (101 MHz, DMSO-*d*<sub>6</sub>) Spectrum of 4f

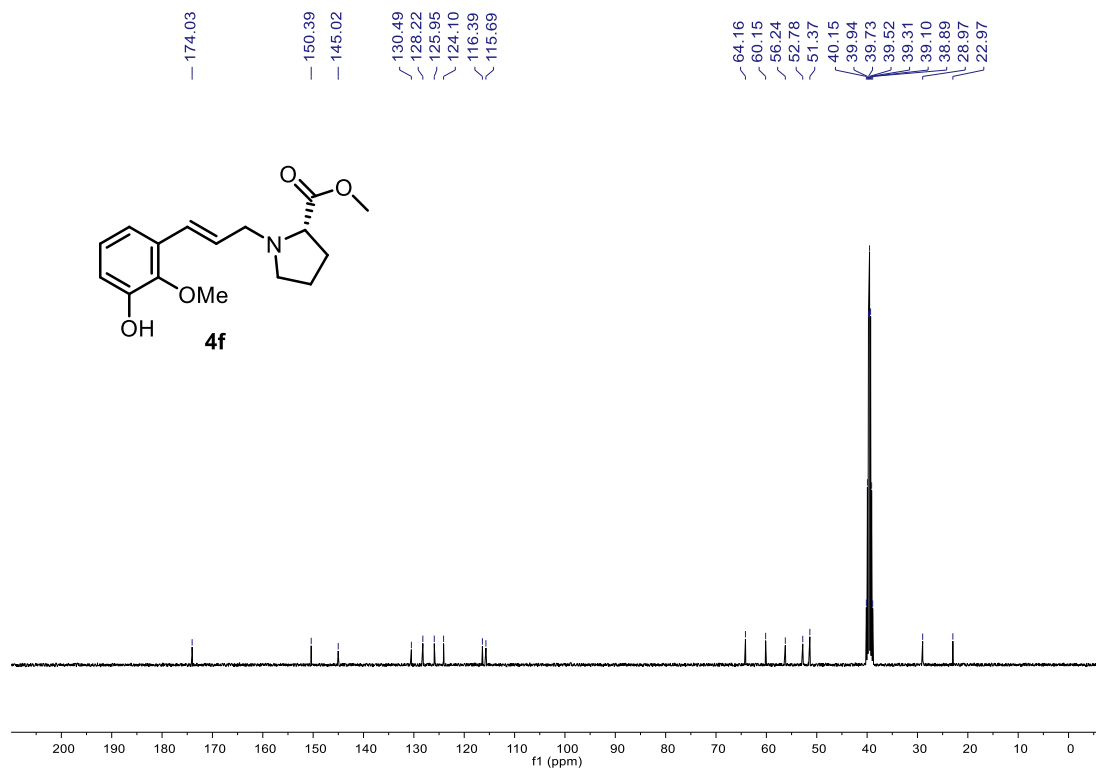

# HRMS of 4f

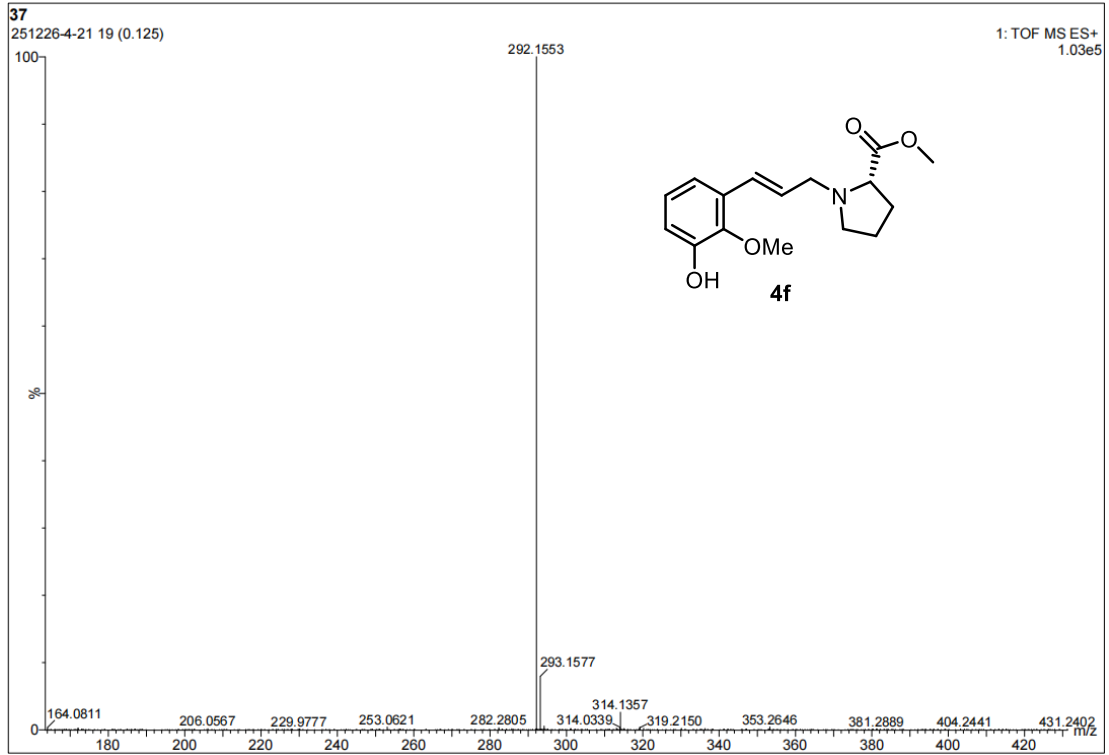

### <sup>1</sup>H NMR (400 MHz, DMSO-*d*<sub>6</sub>) Spectrum of 5f

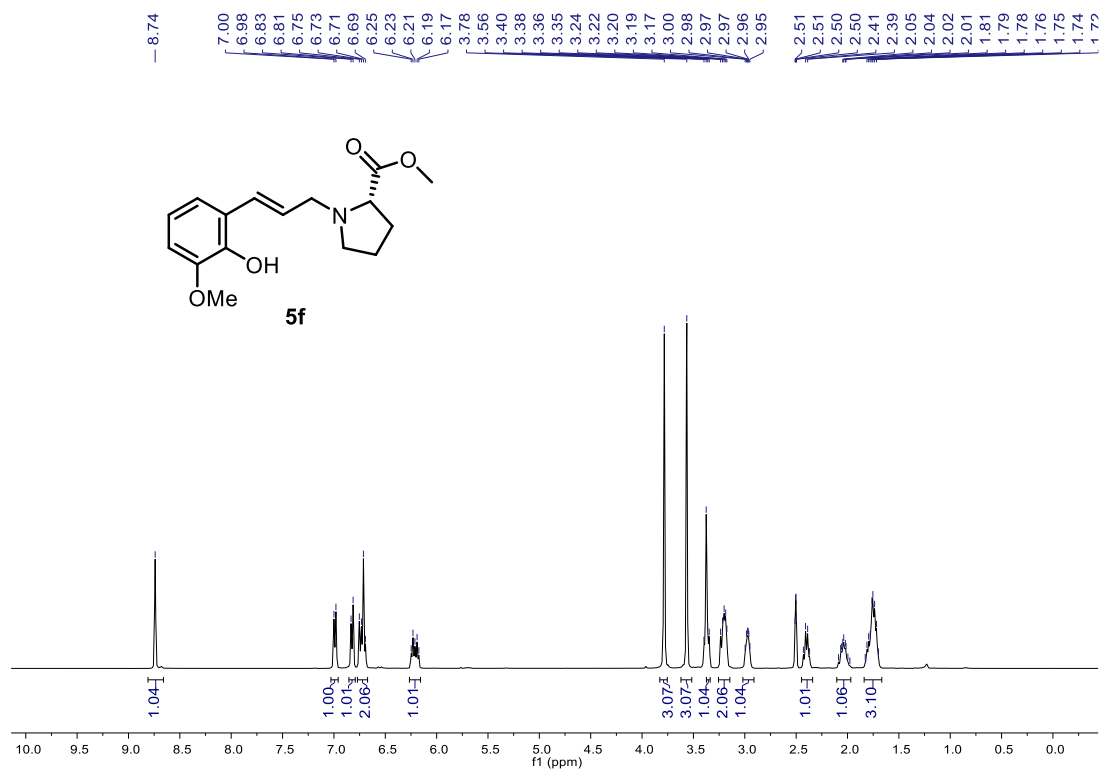

### <sup>13</sup>C NMR (101 MHz, DMSO-*d*<sub>6</sub>) Spectrum of 5f

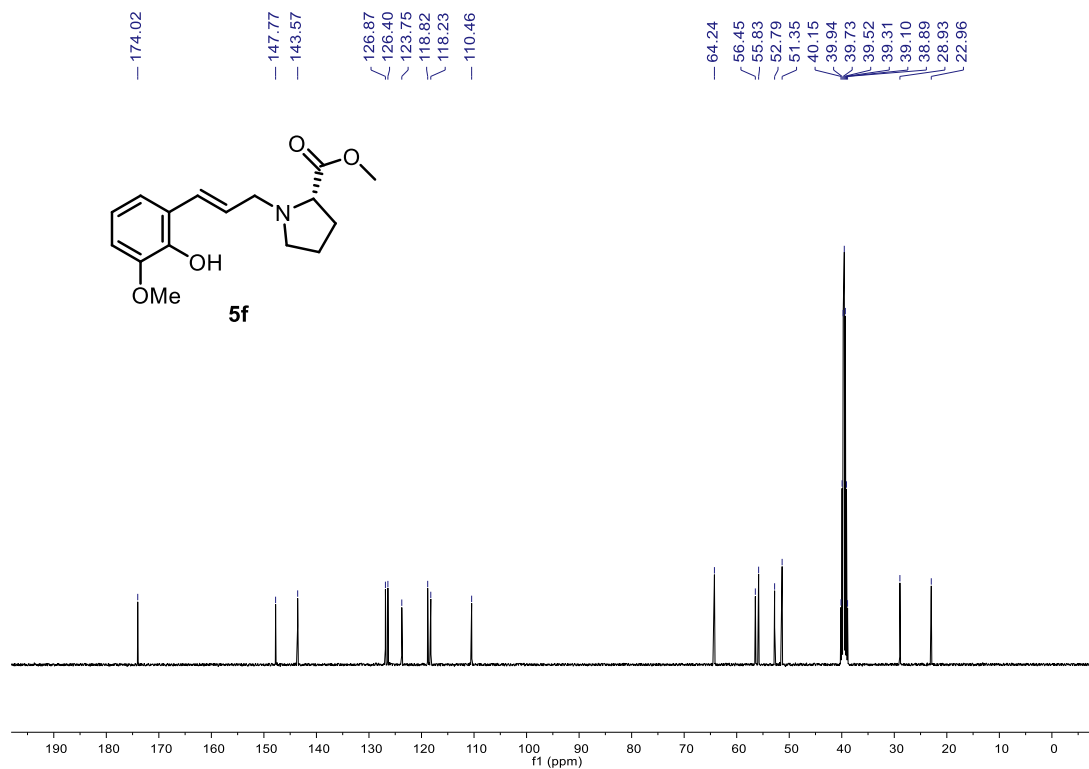

# HRMS of 5f

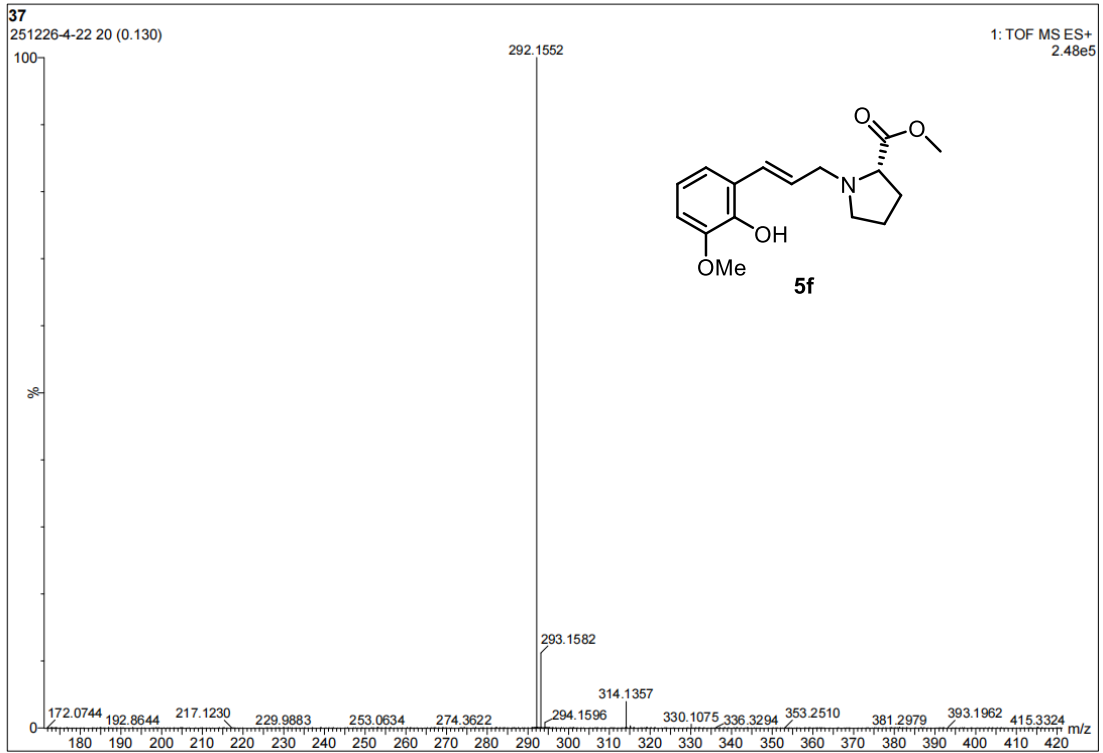

### <sup>1</sup>H NMR (600 MHz, DMSO-d<sub>6</sub>) Spectrum of 6f

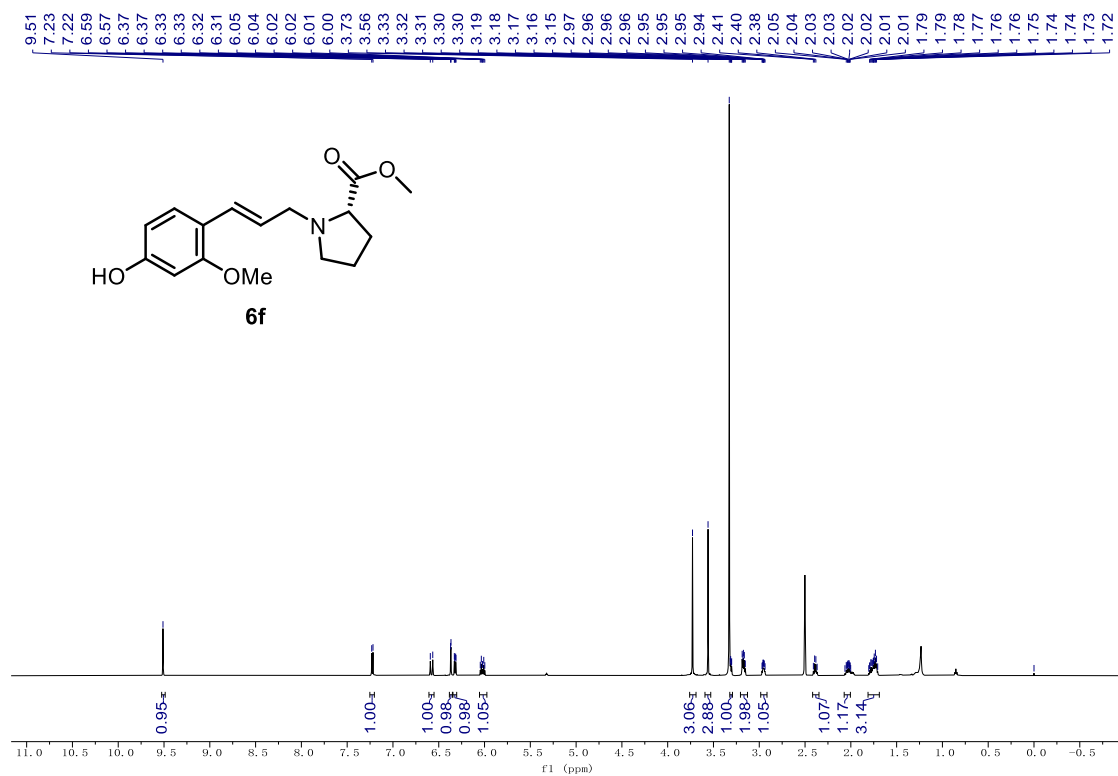

### <sup>13</sup>C NMR (151 MHz, DMSO-d<sub>6</sub>) Spectrum of 6f

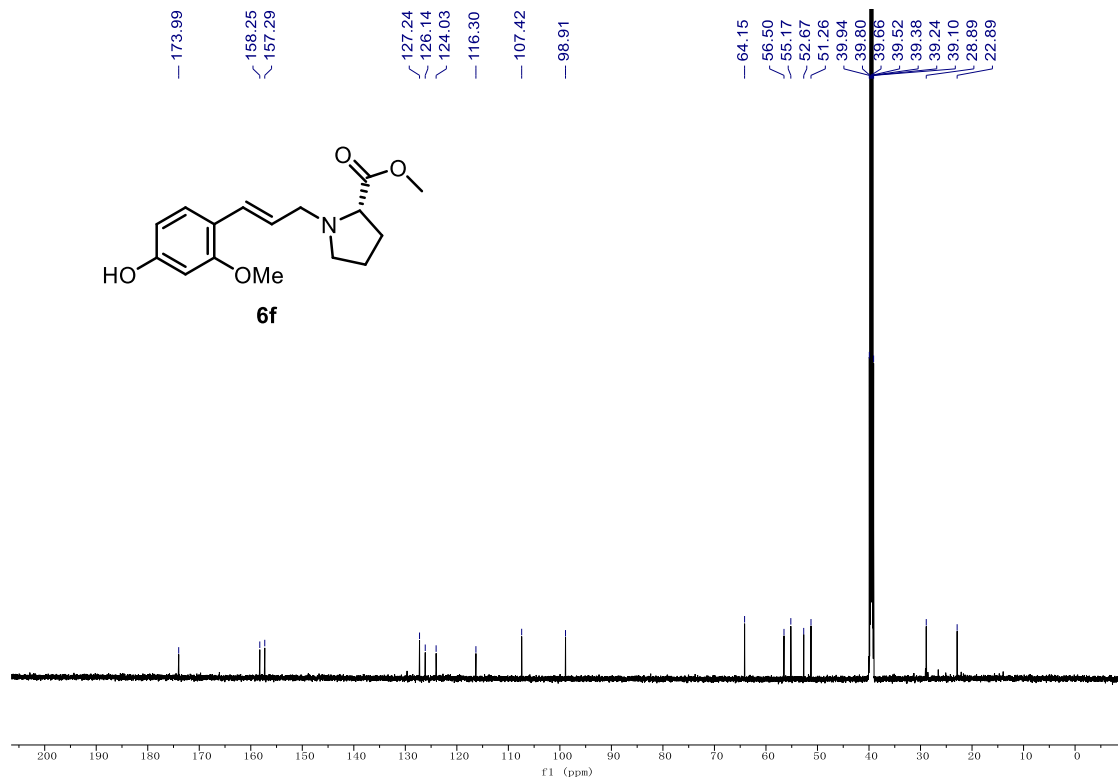

# HRMS of 6f

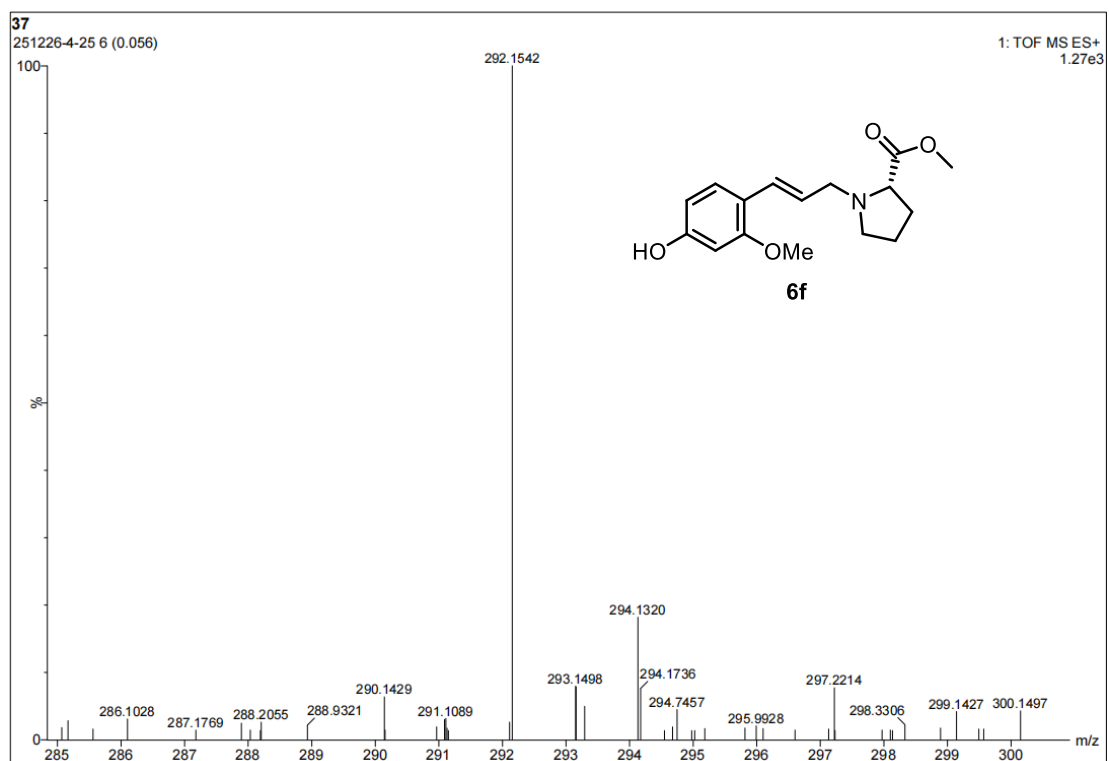

### <sup>1</sup>H NMR (400 MHz, DMSO-d<sub>6</sub>) Spectrum of 7f

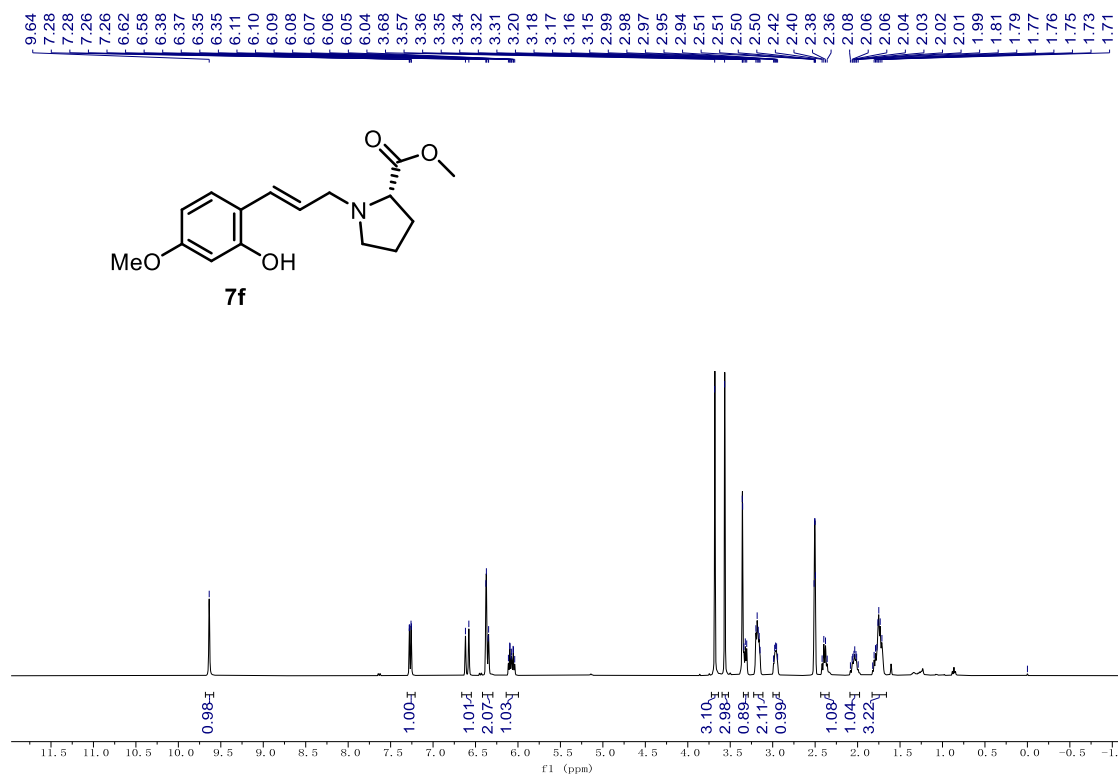

### <sup>13</sup>C NMR (101 MHz, DMSO-d<sub>6</sub>) Spectrum of 7f

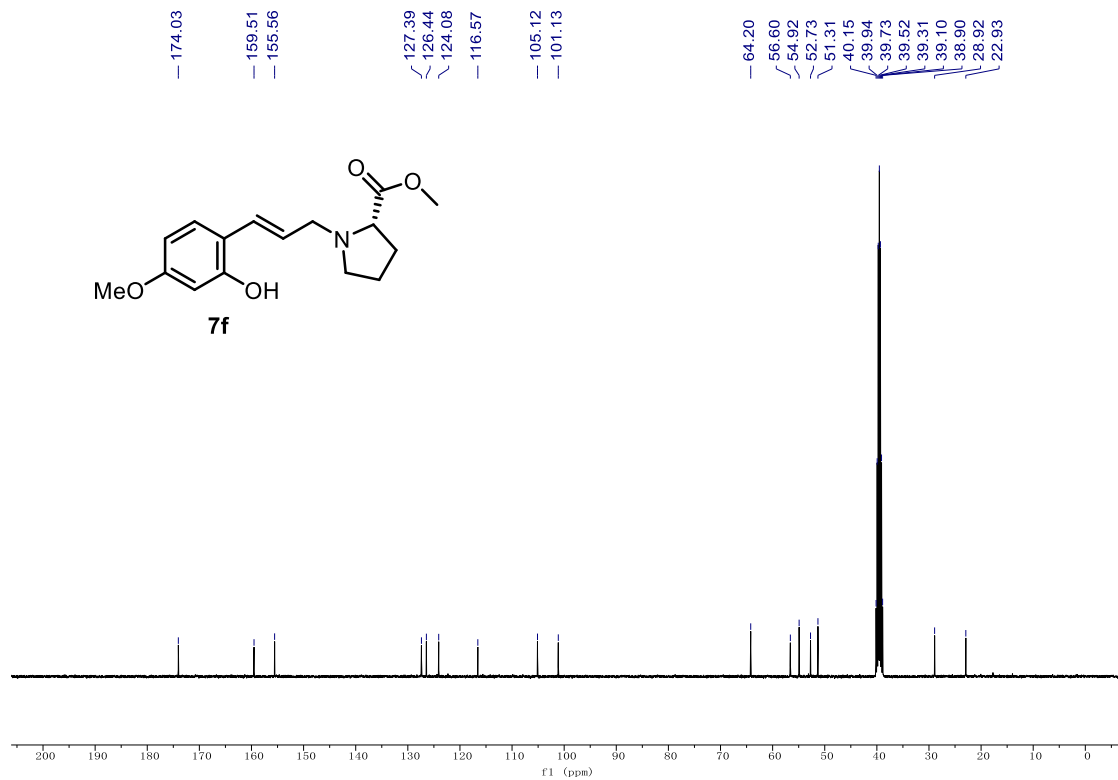

# HRMS of 7f

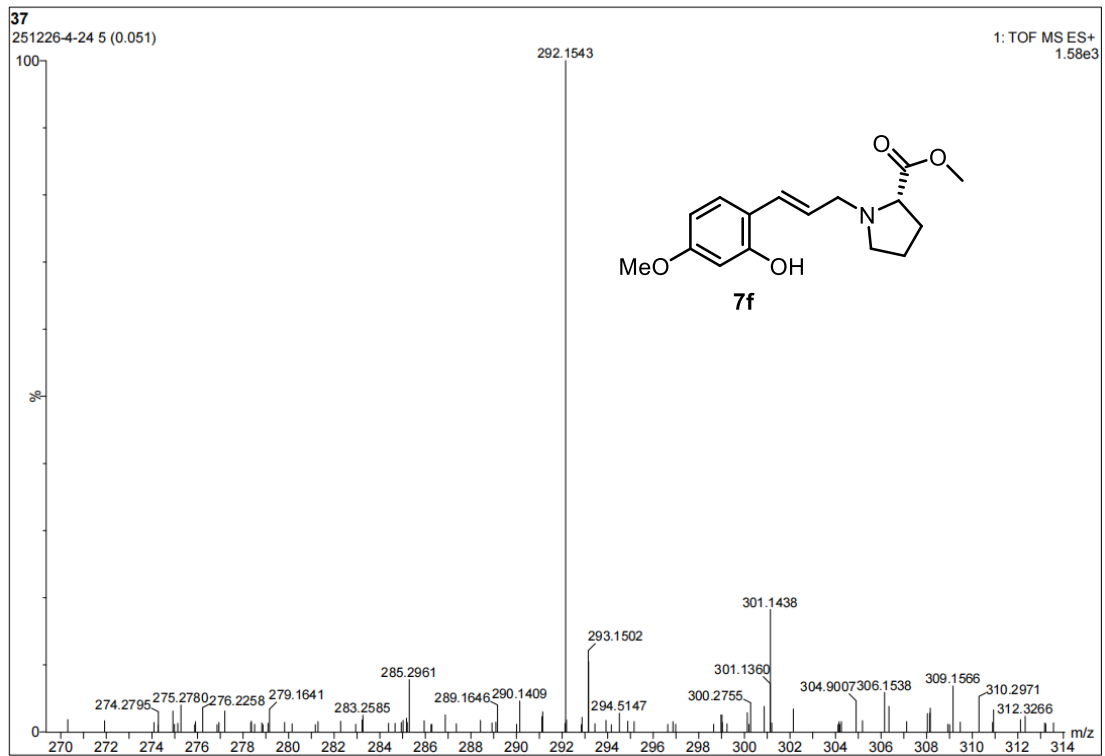

#### 4. Antimicrobial Susceptibility Testing

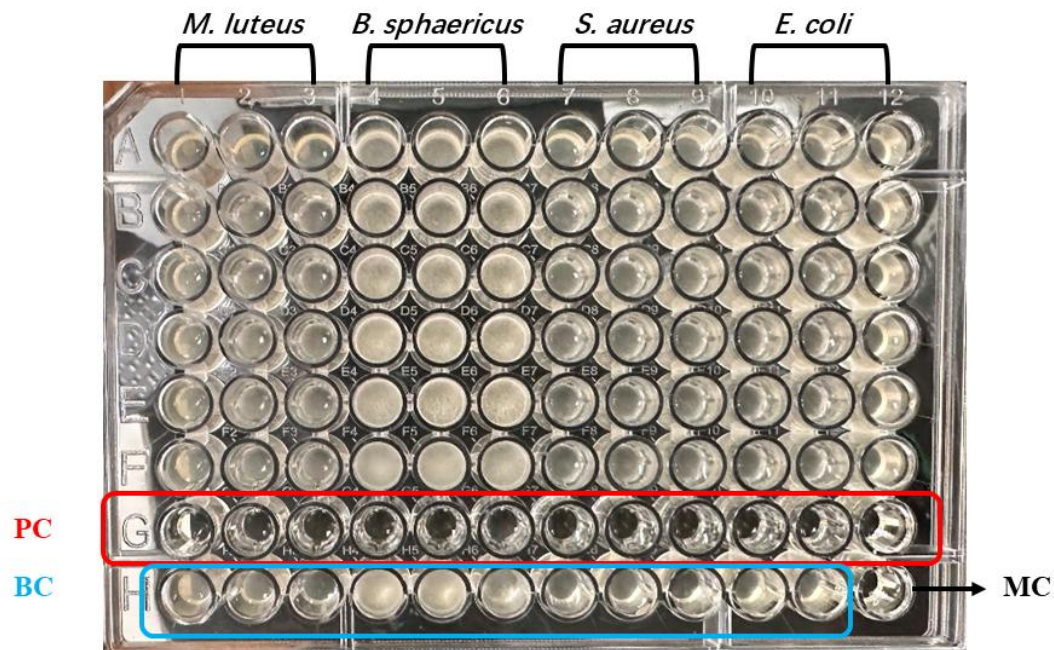

**Positive Control (PC):** A sample known to produce a positive result, used to verify that the testing method itself is valid and functioning properly.

**Bacterial Control (BC):** Containing bacterial inoculum only, without any drug/treatment.

**Medium Control (MC) / Uninoculated Control:** Containing sterile medium only, without bacterial inoculum.
